# Supplementary material
Source: PubMed Central journal article supplement (PMC2562595)

## SUPPORTING INFORMATION

### Amino Acid-Bearing ROMP Polymers with a Stereoregular Backbone

Jae Chul Lee, Kathlyn A. Parker\*, and Nicole S. Sampson\*

Department of Chemistry, Stony Brook University, Stony Brook, NY 11794-3400

#### Table of Contents

|                                                                                                        |            |
|--------------------------------------------------------------------------------------------------------|------------|
| <b>General Information</b> -----                                                                       | <b>S3</b>  |
| <b>Cyclobut-1-enecarboxylic acid</b> -----                                                             | <b>S3</b>  |
| <b>[(Cyclobut-1-enecarbonyl)-amino]-acetic acid methyl ester, (1)</b> -----                            | <b>S4</b>  |
| <b>ROM (Ring Opening Metathesis) One-mer, (3)</b> -----                                                | <b>S5</b>  |
| <b>General procedure for ROMP of 1</b> -----                                                           | <b>S6</b>  |
| <b>7: 10-mer</b> -----                                                                                 | <b>S6</b>  |
| <b>8: 18-mer, 9: 35-mer and 10: 50-mer</b> -----                                                       | <b>S7</b>  |
| <b>Characterization of the polymers</b> -----                                                          | <b>S7</b>  |
| <b>Polymer 7 (<sup>1</sup>H-NMR, <sup>13</sup>C-NMR and gHMQC)</b> -----                               | <b>S8</b>  |
| <b>Polymers 8, 9 and 10 (<sup>1</sup>H-NMR and <sup>13</sup>C-NMR)</b> -----                           | <b>S8</b>  |
| <b>Polymer 8, <sup>13</sup>C-APT</b> -----                                                             | <b>S8</b>  |
| <b>[(E)-2-methyl-but-2-enoylamino]-acetic acid methyl ester, 11</b> -----                              | <b>S9</b>  |
| <b>[(Z)-2-methyl-but-2-enoylamino]-acetic acid methyl ester, 12</b> -----                              | <b>S10</b> |
| <b>PDI (Poly Dispersity Index) determination</b> -----                                                 | <b>S10</b> |
| <b>MALDI-TOF Mass Analysis</b> -----                                                                   | <b>S11</b> |
| <b>References</b> -----                                                                                | <b>S12</b> |
| <b>Figure S1. <sup>1</sup>H-NMR spectra of ROMP polymers</b> -----                                     | <b>S13</b> |
| <b>Figure S2. <sup>13</sup>C-NMR and <sup>13</sup>C-APT-NMR spectra of 8</b> -----                     | <b>S14</b> |
| <b>Figure S3. Plot of molecular weight versus [Monomer]/[Catalyst] for polymers 7-10</b> ----<br>----- | <b>S15</b> |
| <b>Figure S4. MALDI-TOF mass spectrum of polymer 7</b> -----                                           | <b>S16</b> |
| <b>Spectrum list</b>                                                                                   |            |
| <sup>1</sup> H-NMR Spectrum of 1 -----                                                                 | <b>S17</b> |

|                                                 |            |
|-------------------------------------------------|------------|
| <sup>13</sup> C-NMR Spectrum of <b>1</b> -----  | <b>S18</b> |
| <sup>1</sup> H-NMR Spectrum of <b>3</b> -----   | <b>S19</b> |
| gCOSY Spectrum of <b>3</b> -----                | <b>S20</b> |
| <sup>13</sup> C-NMR Spectrum of <b>3</b> -----  | <b>S21</b> |
| <sup>1</sup> H-NMR Spectrum of <b>7</b> -----   | <b>S22</b> |
| <sup>1</sup> H-NMR Spectrum of <b>8</b> -----   | <b>S23</b> |
| <sup>1</sup> H-NMR Spectrum of <b>9</b> -----   | <b>S24</b> |
| <sup>1</sup> H-NMR Spectrum of <b>10</b> -----  | <b>S25</b> |
| gHMQC Spectrum of <b>7</b> -----                | <b>S26</b> |
| <sup>13</sup> C-NMR Spectrum of <b>7</b> -----  | <b>S27</b> |
| <sup>13</sup> C-NMR Spectrum of <b>8</b> -----  | <b>S28</b> |
| <sup>13</sup> C-APT Spectrum of <b>8</b> -----  | <b>S29</b> |
| <sup>13</sup> C-NMR Spectrum of <b>9</b> -----  | <b>S30</b> |
| <sup>1</sup> H-NMR Spectrum of <b>11</b> -----  | <b>S31</b> |
| <sup>13</sup> C-NMR Spectrum of <b>11</b> ----- | <b>S32</b> |
| <sup>1</sup> H-NMR Spectrum of <b>12</b> -----  | <b>S33</b> |
| <sup>13</sup> C-NMR Spectrum of <b>12</b> ----- | <b>S34</b> |

## General Information

All reactions were performed under an N<sub>2</sub> or Ar atmosphere. CH<sub>2</sub>Cl<sub>2</sub> was dried over CaH<sub>2</sub> and distilled prior to use. CD<sub>2</sub>Cl<sub>2</sub> was degassed before use for reactions. Second generation Grubbs' catalyst [(H<sub>2</sub>IMes)(Pcy<sub>3</sub>)(Cl)<sub>2</sub>Ru=CHPh] and ethyl 1-bromocyclobutanecarboxylate were purchased from Aldrich (Cat # 56974-7 and 19729-7). The synthesis of precatalyst **2** was performed using the procedure published by Love, J.A. et al.<sup>1</sup> Neutral alumina and Mallinckrodt silica gel 60 (230-400 mesh) were used for column chromatography. Aluminum TLC (thin layer chromatography) plates were silica gel 60 (F<sub>254</sub>). <sup>1</sup>H NMR spectra were reported as chemical shift in ppm (multiplicity, coupling constant in Hz, and integration). <sup>13</sup>C NMR spectra were reported as chemical shift in ppm. The solvent peak was used as an internal reference. High resolution mass spectra (ESI) were acquired at the University of Illinois at Urbana-Champaign mass spectrometry facility supported by a grant from the National Science Foundation, Division of Biological Infrastructure (DBI-010085).

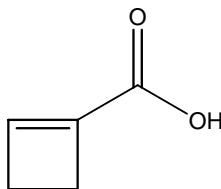

### Cyclobut-1-enecarboxylic acid<sup>2</sup>

Cyclobut-1-enecarboxylic acid was prepared according to the procedure for preparation of 3,3-dimethylcyclobutene carboxylic acid<sup>3</sup> as described by Campbell et al. with minor modifications. KOH (6.00 g, 107 mmol) and toluene (90 mL) were mixed and then heated to reflux until the KOH dissolved. Ethyl 1-bromocyclobutanecarboxylate (4.90 g, 23.7 mmol) was added dropwise without heating.

The reaction mixture was heated at reflux for 1 h, then cooled to RT. Cold water (60 mL) was added, the aqueous layer was washed with pentane (2 x 40 mL) and the pH was adjusted to 2.5 with 30% aq H<sub>2</sub>SO<sub>4</sub>. The product was then extracted from the aqueous layer with Et<sub>2</sub>O (4 x 40 mL) and dried over anhydrous Na<sub>2</sub>SO<sub>4</sub>. The Et<sub>2</sub>O was evaporated to give a yellow oil. The oil was dissolved in pentane (50 mL) and the upper layer was separated from the lower layer. The upper layer was cooled in an acetone-dry ice bath and stirred for 20 min. The resulting precipitate was filtered and dried under vacuum (1.14 g, 49% yield). The dried solid was stored at -20 °C to prevent decomposition. <sup>1</sup>H-NMR (400 MHz, CDCl<sub>3</sub>) δ 10.23 (bs, 1H), 6.94 (t, J=1.2 Hz, 1H), 2.76 (t, J=3.2 Hz, 2H), 2.51 (td, J=3.2 Hz, 1.2 Hz, 2H); <sup>13</sup>C-NMR (100 MHz, CDCl<sub>3</sub>) δ 167.5, 150.1, 138.4, 29.1, 27.5.

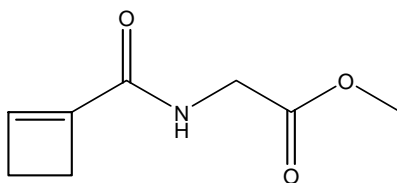

**[(Cyclobut-1-enecarbonyl)-amino]-acetic acid methyl ester, (1).**

Cyclobut-1-enecarboxylic acid (300 mg, 3.06 mmol), glycine methyl ester hydrochloride (423 mg, 3.37 mmol), and 1-(3-dimethylaminopropyl)-3-ethylcarbodiimide hydrochloride (704 mg, 3.67 mmol) were added to a round-bottomed flask. After addition of CH<sub>2</sub>Cl<sub>2</sub> (6 mL) and N,N-diisopropylethylamine (1.07 mL, 6.12 mmol), the reaction mixture was stirred for 12 h at 24 °C. When the reaction was complete, EtOAc (60 mL) was added and the resulting solution was washed with 1N aq HCl (3 x 20 mL) and 5% aq NaHCO<sub>3</sub> (3 x 20 mL). The combined aqueous HCl wash (60

mL) was re-extracted with ethyl acetate (2 x 30 mL). The combined organic solution was washed with the separated aqueous NaHCO<sub>3</sub> solution. The combined organic solution was dried over anhydrous Na<sub>2</sub>SO<sub>4</sub>. The solvent was evaporated and the residue was purified by neutral aluminum oxide column chromatography with 40% EtOAc/CH<sub>2</sub>Cl<sub>2</sub> (216 mg, 42% yield). The purified fractions were concentrated and diluted with dry CH<sub>2</sub>Cl<sub>2</sub> (3 mL) (complete concentration by vacuum should be avoided to prevent radical or ionic polymerization). In the solution state, monomer **1** is stable. For long term storage, the solution was kept at -80 °C to prevent possible decomposition. <sup>1</sup>H-NMR (400 MHz, CDCl<sub>3</sub>) δ 6.67 (t, J=1.2 Hz, 1H), 6.09 (br s, 1H), 4.11 (d, J=5.2 Hz, 2H), 3.78 (s, 3H), 2.73 (t, J=3.2 Hz, 2H), 2.49 (td, J=3.2 Hz, 1.2 Hz, 2H); <sup>13</sup>C-NMR (100 MHz, CDCl<sub>3</sub>) δ 170.6, 162.7, 141.5, 140.9, 52.5, 40.9, 28.6, 26.5; HRMS (ESI) calcd for C<sub>8</sub>H<sub>12</sub>NO<sub>3</sub> [M+H]<sup>+</sup> 170.0817, found 170.0809.

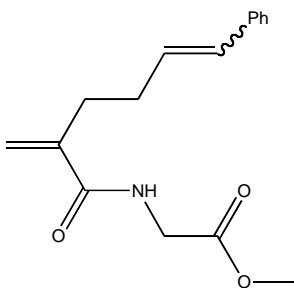

### ROM (Ring Opening Metathesis) One-mer, (**3**).

Precatalyst **2** (70.8 mg, 0.0798 mmol) was dissolved in CH<sub>2</sub>Cl<sub>2</sub> (200 μL) under an Ar atmosphere. A solution of **1** (13.5 mg, 0.0798 mmol) in CH<sub>2</sub>Cl<sub>2</sub> (200 μL) was added to the catalyst solution. After 1 h, the reaction was quenched with ethyl vinyl ether (382 μL, 3.99 mmol). After evaporation of solvent, the residue was purified by silica gel column chromatography with 40% EtOAc/CH<sub>2</sub>Cl<sub>2</sub> to obtain the ROM One-mer (mixture of *E* and

*Z* isomers, 3 mg, 15% yield).  $^1\text{H-NMR}$  (500 MHz,  $\text{CD}_3\text{OD}$ ) *Z-isomer*  $\delta$  7.31-7.17 (m, 5H), 6.44 (d,  $J=11.5$  Hz, 1H), 5.70 (s, 1H), 5.66 (dt,  $J=11.5$  Hz, 7.0 Hz, 1H) 5.38 (s, 1H), 3.93 (s, 2H), 3.70 (s, 3H), 2.50 (m, 4H); *E-isomer*  $\delta$  7.36-7.14 (m, 5H), 6.42 (d,  $J=15.5$  Hz, 1H), 6.24 (dt,  $J=15.5$  Hz, 7.0 Hz, 1H), 5.73 (s, 1H) 5.43 (s, 1H), 3.95 (s, 2H), 3.72 (s, 3H), 2.49 (t,  $J=7.5$  Hz, 2H), 2.38 (q,  $J=7.0$  Hz, 2H);  $^{13}\text{C-NMR}$  (100 MHz,  $\text{CD}_3\text{OD}$ ) *Z-isomer*  $\delta$  172.0, 145.5, 139.0, 132.4, 130.9, 129.9, 129.6, 129.3, 119.9, 52.7, 42.2, 33.7, 28.4 ; *E-isomer*  $\delta$  172.0, 145.6, 139.3, 132.2, 130.5, 128.1, 127.8, 127.2, 120.1, 52.7, 42.2, 33.5, 32.9; HRMS (ESI) calcd for  $\text{C}_{16}\text{H}_{20}\text{NO}_3$   $[\text{M}+\text{H}]^+$  274.1443, found 274.1436.

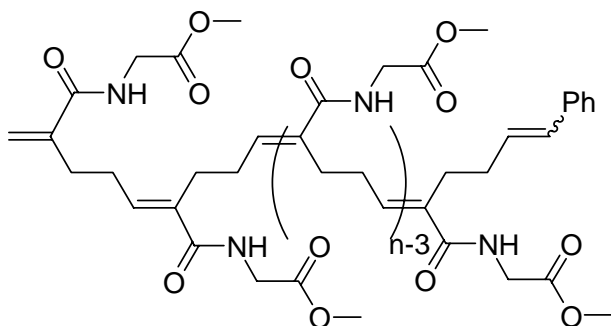

## General procedure for ROMP of **1**

### 7: 10-mer

Under an  $\text{N}_2$  atmosphere, precatalyst **2** (27.0 mg, 0.0302 mmol) was dissolved in  $\text{CH}_2\text{Cl}_2$  (1.8 mL). A solution of 51 mg of **1** in  $\text{CH}_2\text{Cl}_2$  (600  $\mu\text{L}$ ) was added to the catalyst solution. The reaction mixture was stirred for 2 h at 24  $^\circ\text{C}$  and then the reaction was quenched with ethyl vinyl ether (300  $\mu\text{L}$ , 3.13 mmol). After evaporation of solvent, 0.5 mL of  $\text{CH}_2\text{Cl}_2$  was added to dissolve the residue and 2 mL of  $\text{Et}_2\text{O}$  was added while stirring. The resulting sticky precipitate (48 mg, 89% yield) was further purified by

silica gel column chromatography with 10% MeOH/CH<sub>2</sub>Cl<sub>2</sub>. The pure fractions were combined and dried under vacuum to yield 31 mg of the polymer (57% final yield).

### 8: 18-mer, 9: 35-mer and 10: 50-mer

For polymers longer than the 10-mer, **7**, the polymerization procedure was slightly modified. Polymerizations were performed in an NMR tube and CD<sub>2</sub>Cl<sub>2</sub> was used in order to monitor the reactions. For **9** and **10**, the reaction mixtures were warmed to 40 °C after 5 min to increase the reaction rate. A summary of the reaction conditions is presented in Table S1.

**Table S1.** Reaction Summary

| Product                | Rxn solvent                     | Rxn temp (°C) | Rxn time (h) | % yield after precipitation (MC/diethyl ether) | % yield after silica column purification |
|------------------------|---------------------------------|---------------|--------------|------------------------------------------------|------------------------------------------|
| <b>3</b> , ROM One-mer | CH <sub>2</sub> Cl <sub>2</sub> | 24            | 1.5          | -----                                          | 15                                       |
| <b>7</b> , 10-mer      | CH <sub>2</sub> Cl <sub>2</sub> | 24            | 2            | 90                                             | 57                                       |
| <b>8</b> , 18-mer      | CD <sub>2</sub> Cl <sub>2</sub> | 24            | 20           | 80                                             | 59                                       |
| <b>9</b> , 35-mer      | CD <sub>2</sub> Cl <sub>2</sub> | 24-40         | 4            | 71                                             | 59                                       |
| <b>10</b> , 50-mer     | CD <sub>2</sub> Cl <sub>2</sub> | 24-40         | 4            | 76                                             | 64                                       |

### Characterization of the polymers

The polymers were characterized by <sup>1</sup>H NMR, <sup>13</sup>C NMR, gHMQC, and <sup>13</sup>C-APT spectroscopy.

**Polymer 7:**  $^1\text{H-NMR}$  (500 MHz,  $\text{CD}_2\text{Cl}_2:\text{CD}_3\text{OD}/2:1$ )  $\delta$  7.90~7.60 (bm, NH), 7.36~7.15 (m, 5H), 6.35~6.10 (bs, 11H), 5.56 (bs, 1H), 5.39 (bs, 1H), 4.03~3.84 (bs, 20H), 3.75~3.58 (bs, 30H) 2.55~2.10 (bm, 40H);  $^{13}\text{C-NMR}$  (100 MHz,  $\text{CD}_2\text{Cl}_2:\text{CD}_3\text{OD}/2:1$ )  $\delta$  171.7, 171.6, 136.4, 136.3, 133.0–128.5 (styrenyl carbons), 119.8, 52.6, 42.0, 28.4, 26.9. The gHMQC data is summarized in Table S2.

**Table S2.**  $^1\text{H-NMR}$  and  $^{13}\text{C-NMR}$  correlation of **7** using gHMQC spectroscopy.

|                                  |       |       |      |      |      |      |
|----------------------------------|-------|-------|------|------|------|------|
| $^1\text{H-NMR}$ ( $\delta$ )    | 7.29  | 6.22  | 3.91 | 3.65 | 2.39 | 2.25 |
| $^{13}\text{C-NMR}$ ( $\delta$ ) | 129.3 | 136.4 | 42.0 | 52.6 | 26.9 | 28.4 |

**Polymers 8, 9 and 10:** The  $^1\text{H-NMR}$  and  $^{13}\text{C-NMR}$  spectra were the same as in polymer **7** except the relative integrations of peaks changed. The integration of the alkene peak at 6.22 ppm relative to the phenyl proton peak at 7.36-7.15 ppm increases as expected with the increasing length of the polymers. The integrations of the glycine (methylene and methyl protons) and backbone (methylene protons) protons also increase in the same way (Figure S1).<sup>7</sup>

**Polymer 8,  $^{13}\text{C-APT}$ :** A  $^{13}\text{C-APT}$  spectrum of polymer **8** was acquired. (100 MHz,  $\text{CD}_2\text{Cl}_2:\text{CD}_3\text{OD}/2:1$ )  $\delta$  171.7 (quaternary C, carbonyl), 171.6 (quaternary C, carbonyl), 136.4 (CH, alkene), 136.3 (quaternary C, alkene), 133.0–128.5 (CH, styrenyl carbons), 119.7 ( $\text{CH}_2$ , terminal alkene), 52.6 ( $\text{CH}_3$ , methyl ester of glycine), 42.0 ( $\text{CH}_2$ , methylene of glycine), 28.4 ( $\text{CH}_2$ , methylene of backbone), 26.9 ( $\text{CH}_2$ , methylene of backbone).



In order to elucidate the geometry of the conjugated double bond(s), we prepared two trisubstituted unsaturated amides as model compounds for the (*E*) or (*Z*) units of the polymers; [(*E*)-2-methyl-but-2-enoylamino]-acetic acid methyl ester (**11**) and [(*Z*)-2-methyl-but-2-enoylamino]-acetic acid methyl ester (**12**). The chemical shift of the proton on carbon 3 in reference compound **11** is 6.47 ppm and in reference compound **12** is 5.65 ppm. Furthermore, the chemical shift of the proton on carbon 3 of (*E*)-*N*,2-dimethyl-2-butenamide is 6.29 ppm.<sup>6</sup> The observed chemical shift of the alkene proton in polymers **7-10** is 6.22 ppm, and thus, these polymers are stereoregular with *E* stereochemistry.

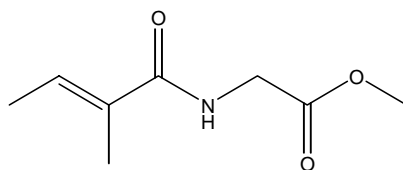

**[(*E*)-2-methyl-but-2-enoylamino]-acetic acid methyl ester, **11**.**

(*E*)-2-methyl-2-butenic acid (300 mg, 3.00 mmol) was dissolved in CH<sub>2</sub>Cl<sub>2</sub> (6 mL) and *N*-methyl morpholine (396 μL, 3.60 mmol) was added to the solution. The reaction mixture was cooled to -15 °C. Isobutyl chloroformate (389 μL, 3.00 mmol) was added and stirred at -15 °C for 15 min. Glycine methyl ester hydrochloride (377 mg, 3.00 mmol), CH<sub>2</sub>Cl<sub>2</sub> (4 mL), and *N*-methyl morpholine (330 μL, 3.00 mmol) were added to the solution. After stirring at -15 °C for 15 min, the reaction mixture was warmed to 24 °C and stirred for 16 h. CH<sub>2</sub>Cl<sub>2</sub> (60 mL) was added to the reaction mixture and the organic layer was washed with 1 N aq HCl (3 x 20 mL) and 5% aq NaHCO<sub>3</sub> (3 x 20 mL). The organic layer was dried over anhydrous Na<sub>2</sub>SO<sub>4</sub> and the solvent was evaporated. The crude product was purified by silica gel column chromatography using 30% and 40%

EtOAc/CH<sub>2</sub>Cl<sub>2</sub> to give **11** (219 mg, 43% yield). <sup>1</sup>H-NMR (400 MHz, CDCl<sub>3</sub>) δ 6.47 (m, 1H), 6.37 (bs, 1H), 4.05 (d, J=4.8 Hz, 2H), 3.73 (s, 3H), 1.83 (m, 3H), 1.73 (m, 3H); <sup>13</sup>C-NMR (100 MHz, CDCl<sub>3</sub>) δ 170.8, 169.4, 131.8, 131.2, 52.4, 41.6, 14.0, 12.3; HRMS (ESI) calcd for C<sub>8</sub>H<sub>14</sub>NO<sub>3</sub> [M+H]<sup>+</sup> 172.0974, found 172.0974.

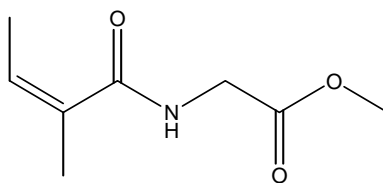

**[(Z)-2-methyl-but-2-enoylamino]-acetic acid methyl ester, 12.**

[(Z)-2-methyl-but-2-enoylamino]-acetic acid methyl ester was prepared by coupling procedure above with (Z)-2-methyl-2-butenic acid (300 mg, 3.00 mmol). Amide **12** was obtained after chromatography (219 mg, 45% yield). <sup>1</sup>H-NMR (400 MHz, CDCl<sub>3</sub>) δ 6.21 (bs, 1H), 5.65 (m, 1H), 4.07 (d, J=5.2 Hz, 1H), 4.06 (d, J=5.6 Hz, 1H), 3.73 (s, 3H), 1.86 (m, 3H), 1.81 (m, 3H); <sup>13</sup>C-NMR (100 MHz, CDCl<sub>3</sub>) δ 170.6, 170.2, 132.0, 129.3, 52.4, 41.1, 20.8, 15.2; HRMS (ESI) calcd for C<sub>8</sub>H<sub>14</sub>NO<sub>3</sub> [M+H]<sup>+</sup> 172.0974, found 172.0967.

**PDI (Poly Dispersity Index) determination**

Purified polymers were dissolved in 10% MeOH/CH<sub>2</sub>Cl<sub>2</sub> (0.25 mg/mL). An aliquot (50 μL) of the polymer solution was injected and analyzed by gel permeation chromatography using a Phenogel column (300 x 4.60 mm, 5 μm, linear mixed bed, 100-10<sup>7</sup> MW range). Elution was performed at 0.35 mL/min with CH<sub>2</sub>Cl<sub>2</sub>:MeOH (9:1) and

detection at 240 nm at 24 °C. Narrowly dispersed polystyrene standards from Aldrich were used as molecular weight calibrants. The number average and weighted average molecular weights were calculated from the chromatogram. The results are shown in Table 1 of the manuscript. A plot of molecular weight versus [Monomer]/[Catalyst] is linear (Figure S3).

### **MALDI-TOF Mass Analysis**

The 10-mer, **7**, was analyzed by MALDI-TOF on an Autoflex TOF/TOF (Bruker Daltonics) and spectra were recorded in the linear mode without matrix suppression. 5-Chloro-2-mercaptobenzothiazole (CMBT) was used as the matrix, and a three point calibration was performed using angiotensin II ( human, monoisotopic  $[M+H]^+$ : 1046.5423), ACTH fragment 18-39 ( human, monoisotopic  $[M+H]^+$ : 2465.1989), and insulin (bovine, average  $[M+H]^+$ : 5734.51). The polymer was dissolved in 10% MeOH/CH<sub>2</sub>Cl<sub>2</sub> at a concentration of 1 mg/mL. The matrix solution was prepared at a concentration of 4 mg/mL in 50% MeOH/ CH<sub>2</sub>Cl<sub>2</sub>. The polymer was mixed in a ratio of 1/10 (v/v) with the matrix solution and 1 μL of the mixture was applied to the target surface and dried. Fig S4 shows the spectrum with centroided mass/charge values. Only the  $[M+Na]^+$  ions were observed. The mass of the residual end group was 104.6 which is consistent with the expected structure of **7**. The number average molecular weight ( $\overline{M}_n$ ) is 1935.29, the weight average molecular weight ( $\overline{M}_w$ ) is 2230.44, the degree of polymerization is 11.45, and the PDI is 1.15 (calculated by PolyTools, Bruker) The calculated monoisotopic molecular weight for the 11-mer was 1986.82  $[M+Na]^+$  and the observed monoisotopic peak was 1986.75  $[M+Na]^+$  (Figure S4, inset).

## References:

1. Love, J. A.; Morgan, J. P.; Trnka, T. M.; Grubbs, R. H., *Angew. Chem. Int. Ed.* **2002**, *41*, 4035-4037.
2. This compound has been prepared previously by the method of Campbell et al.<sup>3</sup> However, no spectroscopic data appeared in these reports.<sup>4,5</sup>
3. Campbell, A.; Rydon, H. N., *J. Chem. Soc.* **1953**, 3002-3008.
4. Griffin, R. J.; Arris, C. E.; Bleasdale, C.; Boyle, F. T.; Calvert, A. H.; Curtin, N. J.; Dalby, C.; Kanugula, S.; Lembicz, N. K.; Newell, D. R.; Pegg, A. E.; Golding, B. T. *J. Med. Chem.* **2000**, *43*, 4071-4083.
5. Lange, G. L.; Otulakowski, J. A. *J. Org. Chem.* **1982**, *47*, 5093-5096.
6. Beak, P.; Kempf, D. J.; Wilson, K. D., *J. Am. Chem. Soc.* **1985**, *107*, 4745-4756.
7. A small doublet appears at  $\delta$  5.66 in the  $^1\text{H}$  NMR spectrum of **7**. The multiplicity of this peak is inconsistent with assignment to the Z-isomer. Moreover, the relative integration of this peak decreases as the polymer becomes longer. It appears to be an impurity arising from the catalyst. This impurity also appears in the  $^{13}\text{C}$  NMR spectra at 137.4 ppm and 134.9 ppm. Again, the peak intensity decreases with increasing polymer length, consistent with it originating from catalyst.

**Figure S1.**  $^1\text{H-NMR}$  spectra of ROMP polymers.

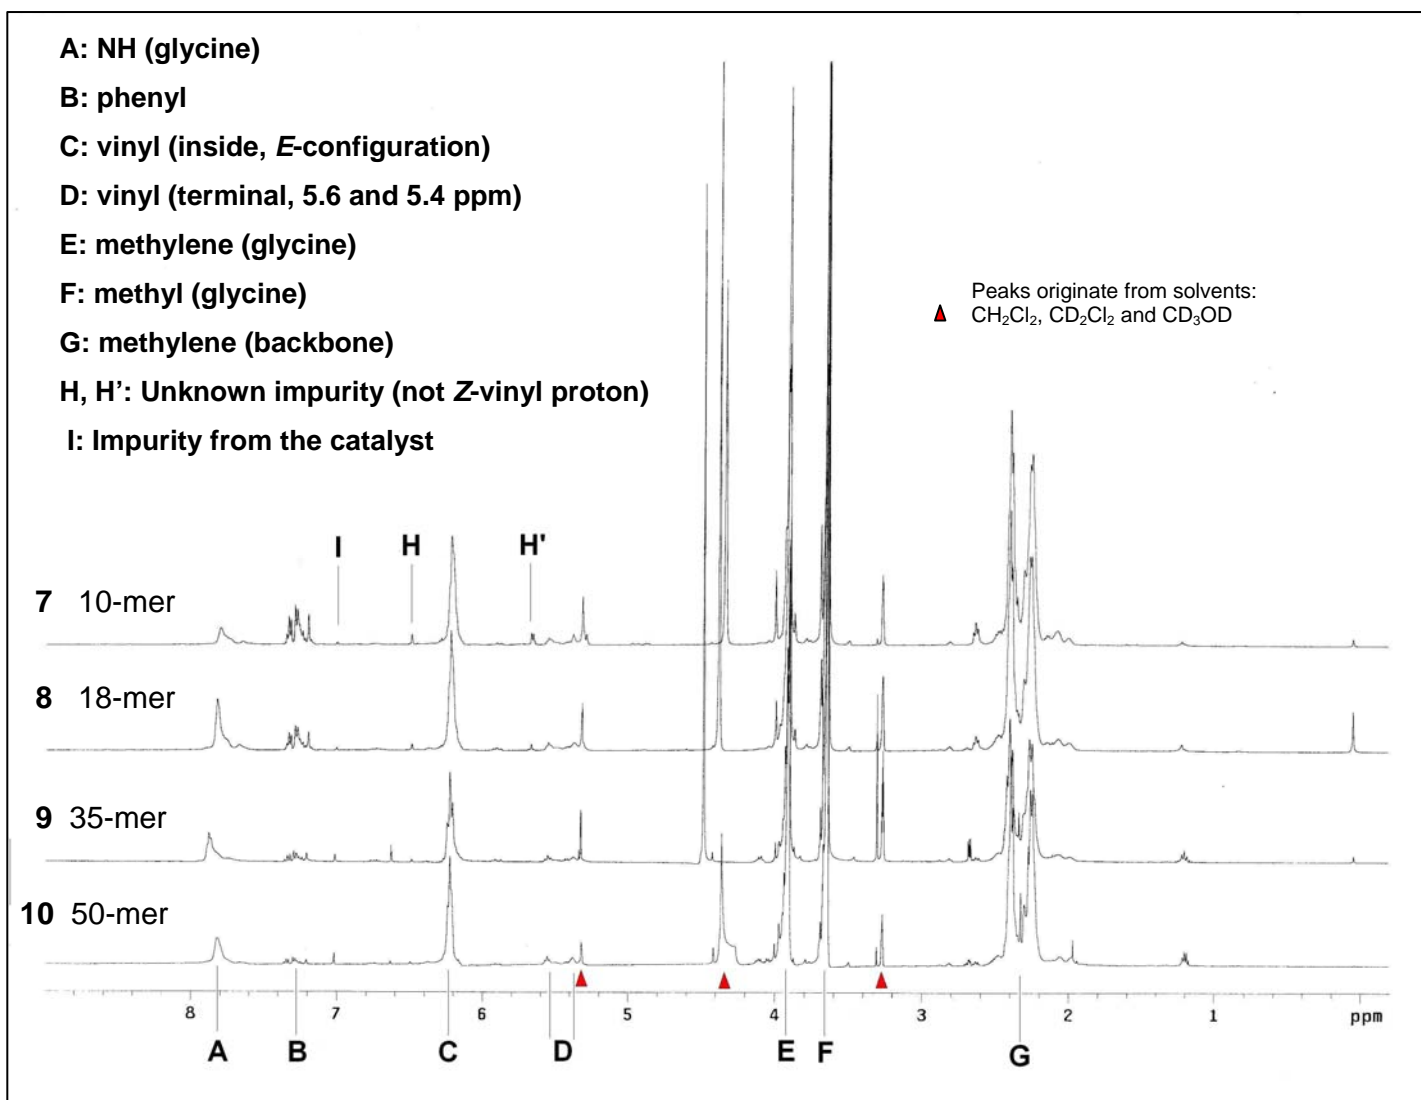

**Figure S2.**  $^{13}\text{C}$ -NMR and  $^{13}\text{C}$ -APT-NMR spectra of **8**.

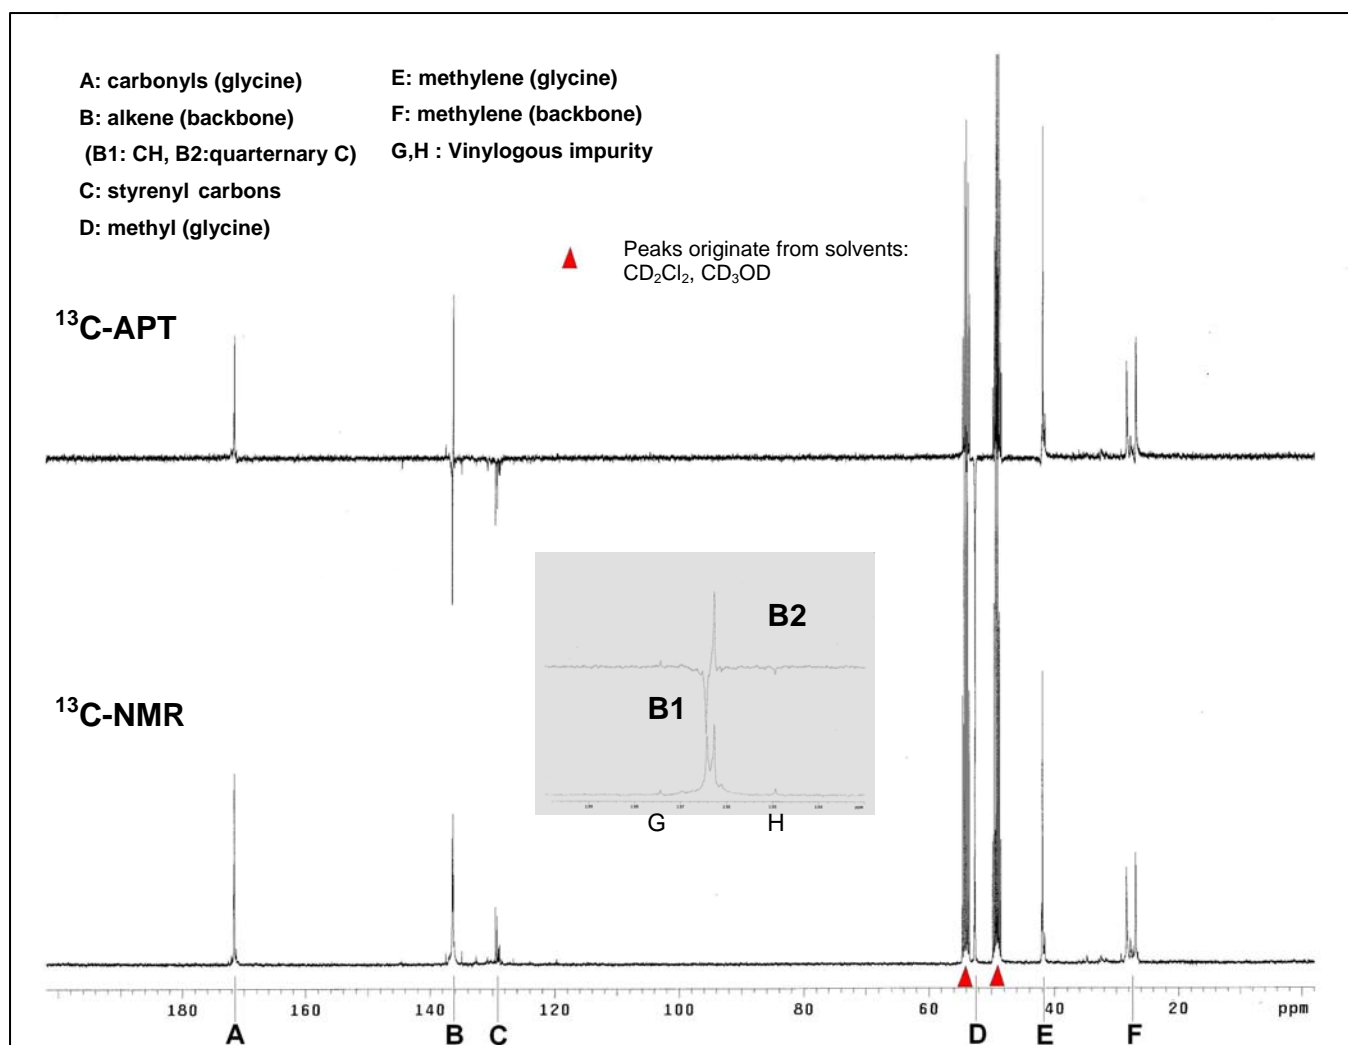

**Figure S3.** Plot of molecular weight versus [Monomer]/[Catalyst] for polymers **7-10**.

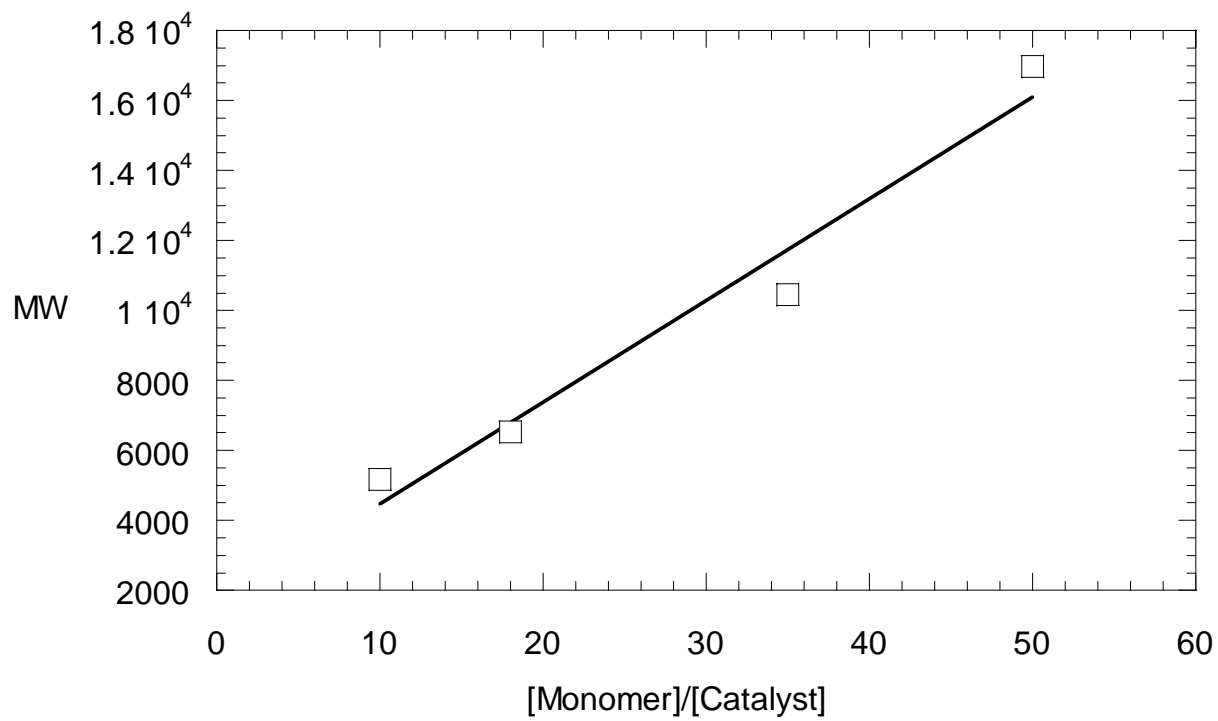

**Figure S4.** MALDI-TOF mass spectrum of polymer **7**. (The inset shows the peaks corresponding to  $n=11$ , labeled with the monoisotopic mass/charge ratio.)

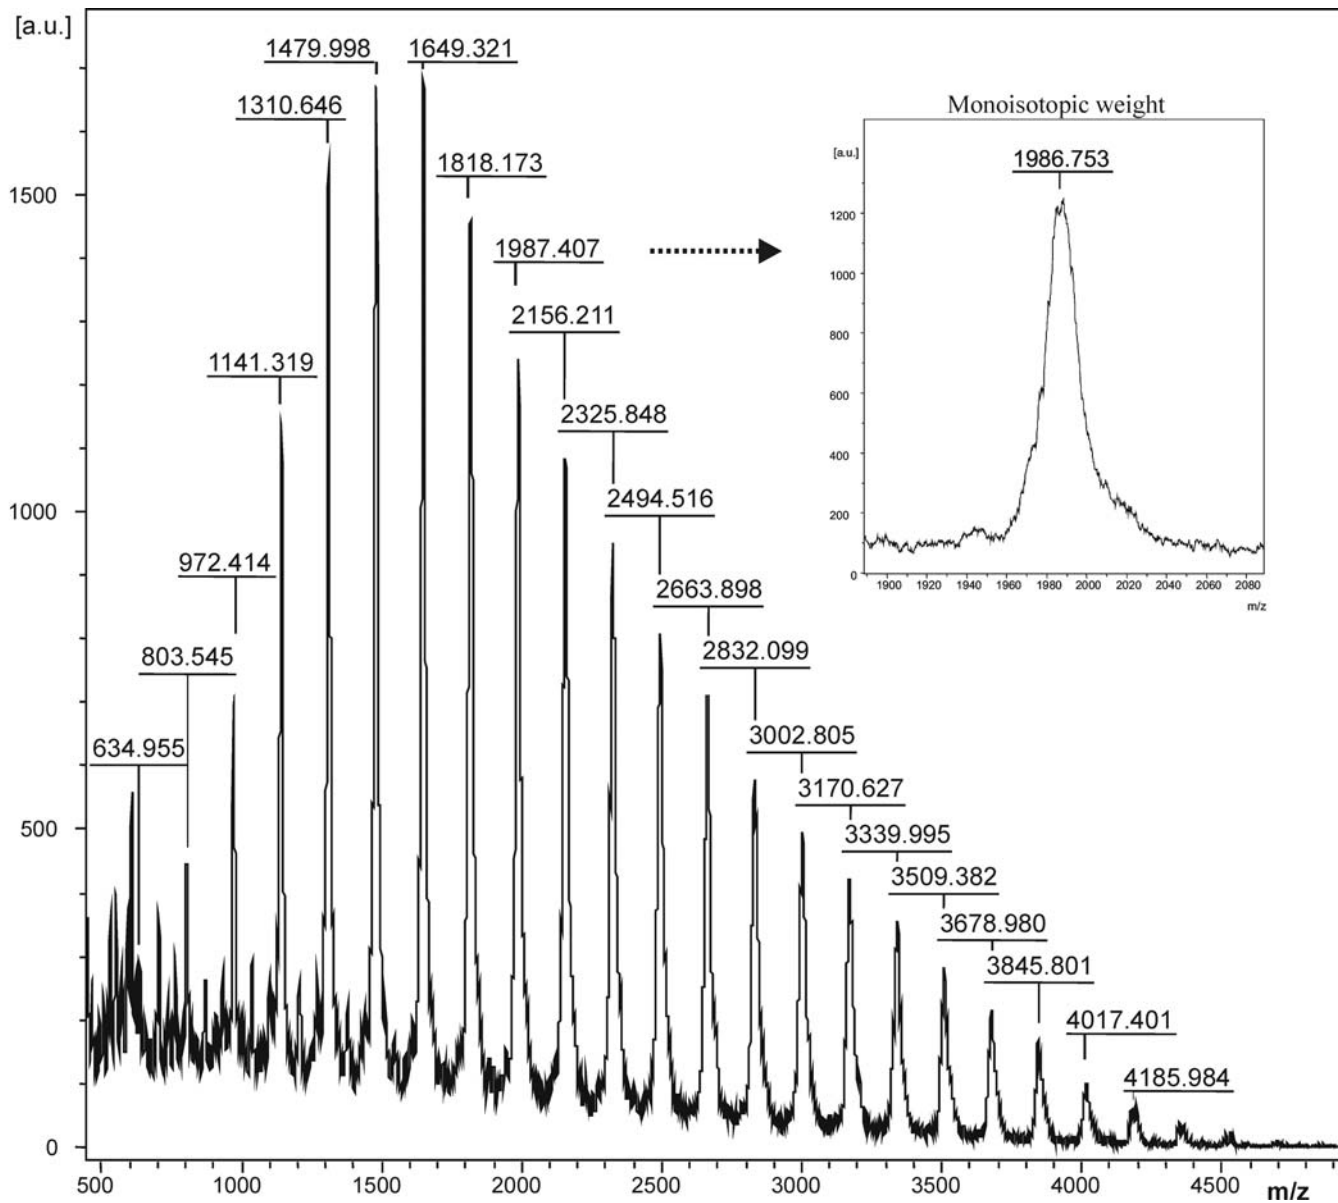



## 1H-NMR

062305-CyBuGlyOMe

Pulse Sequence: s2pu1

Solvent: CDCl3  
Temp. 25.0 C / 298.1 K  
INOVA-400 "inv400"Relax. delay 1.000 sec  
Pulse 66.0 degrees  
Acq. time 3.744 sec  
Width 6000.6 Hz  
120 repetitions  
OBSERVE H1, 399.8379347 MHz  
DATA PROCESSING  
FT Size 65536  
Total time 15 min, 50 sec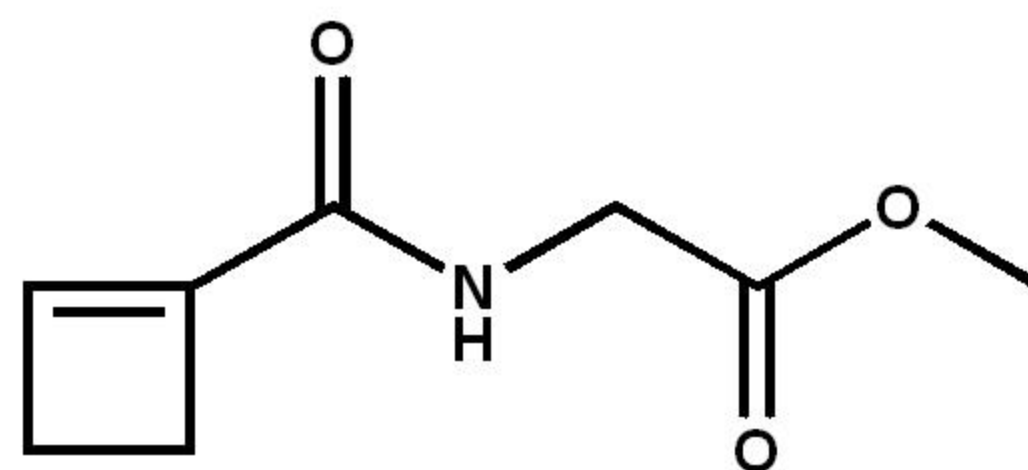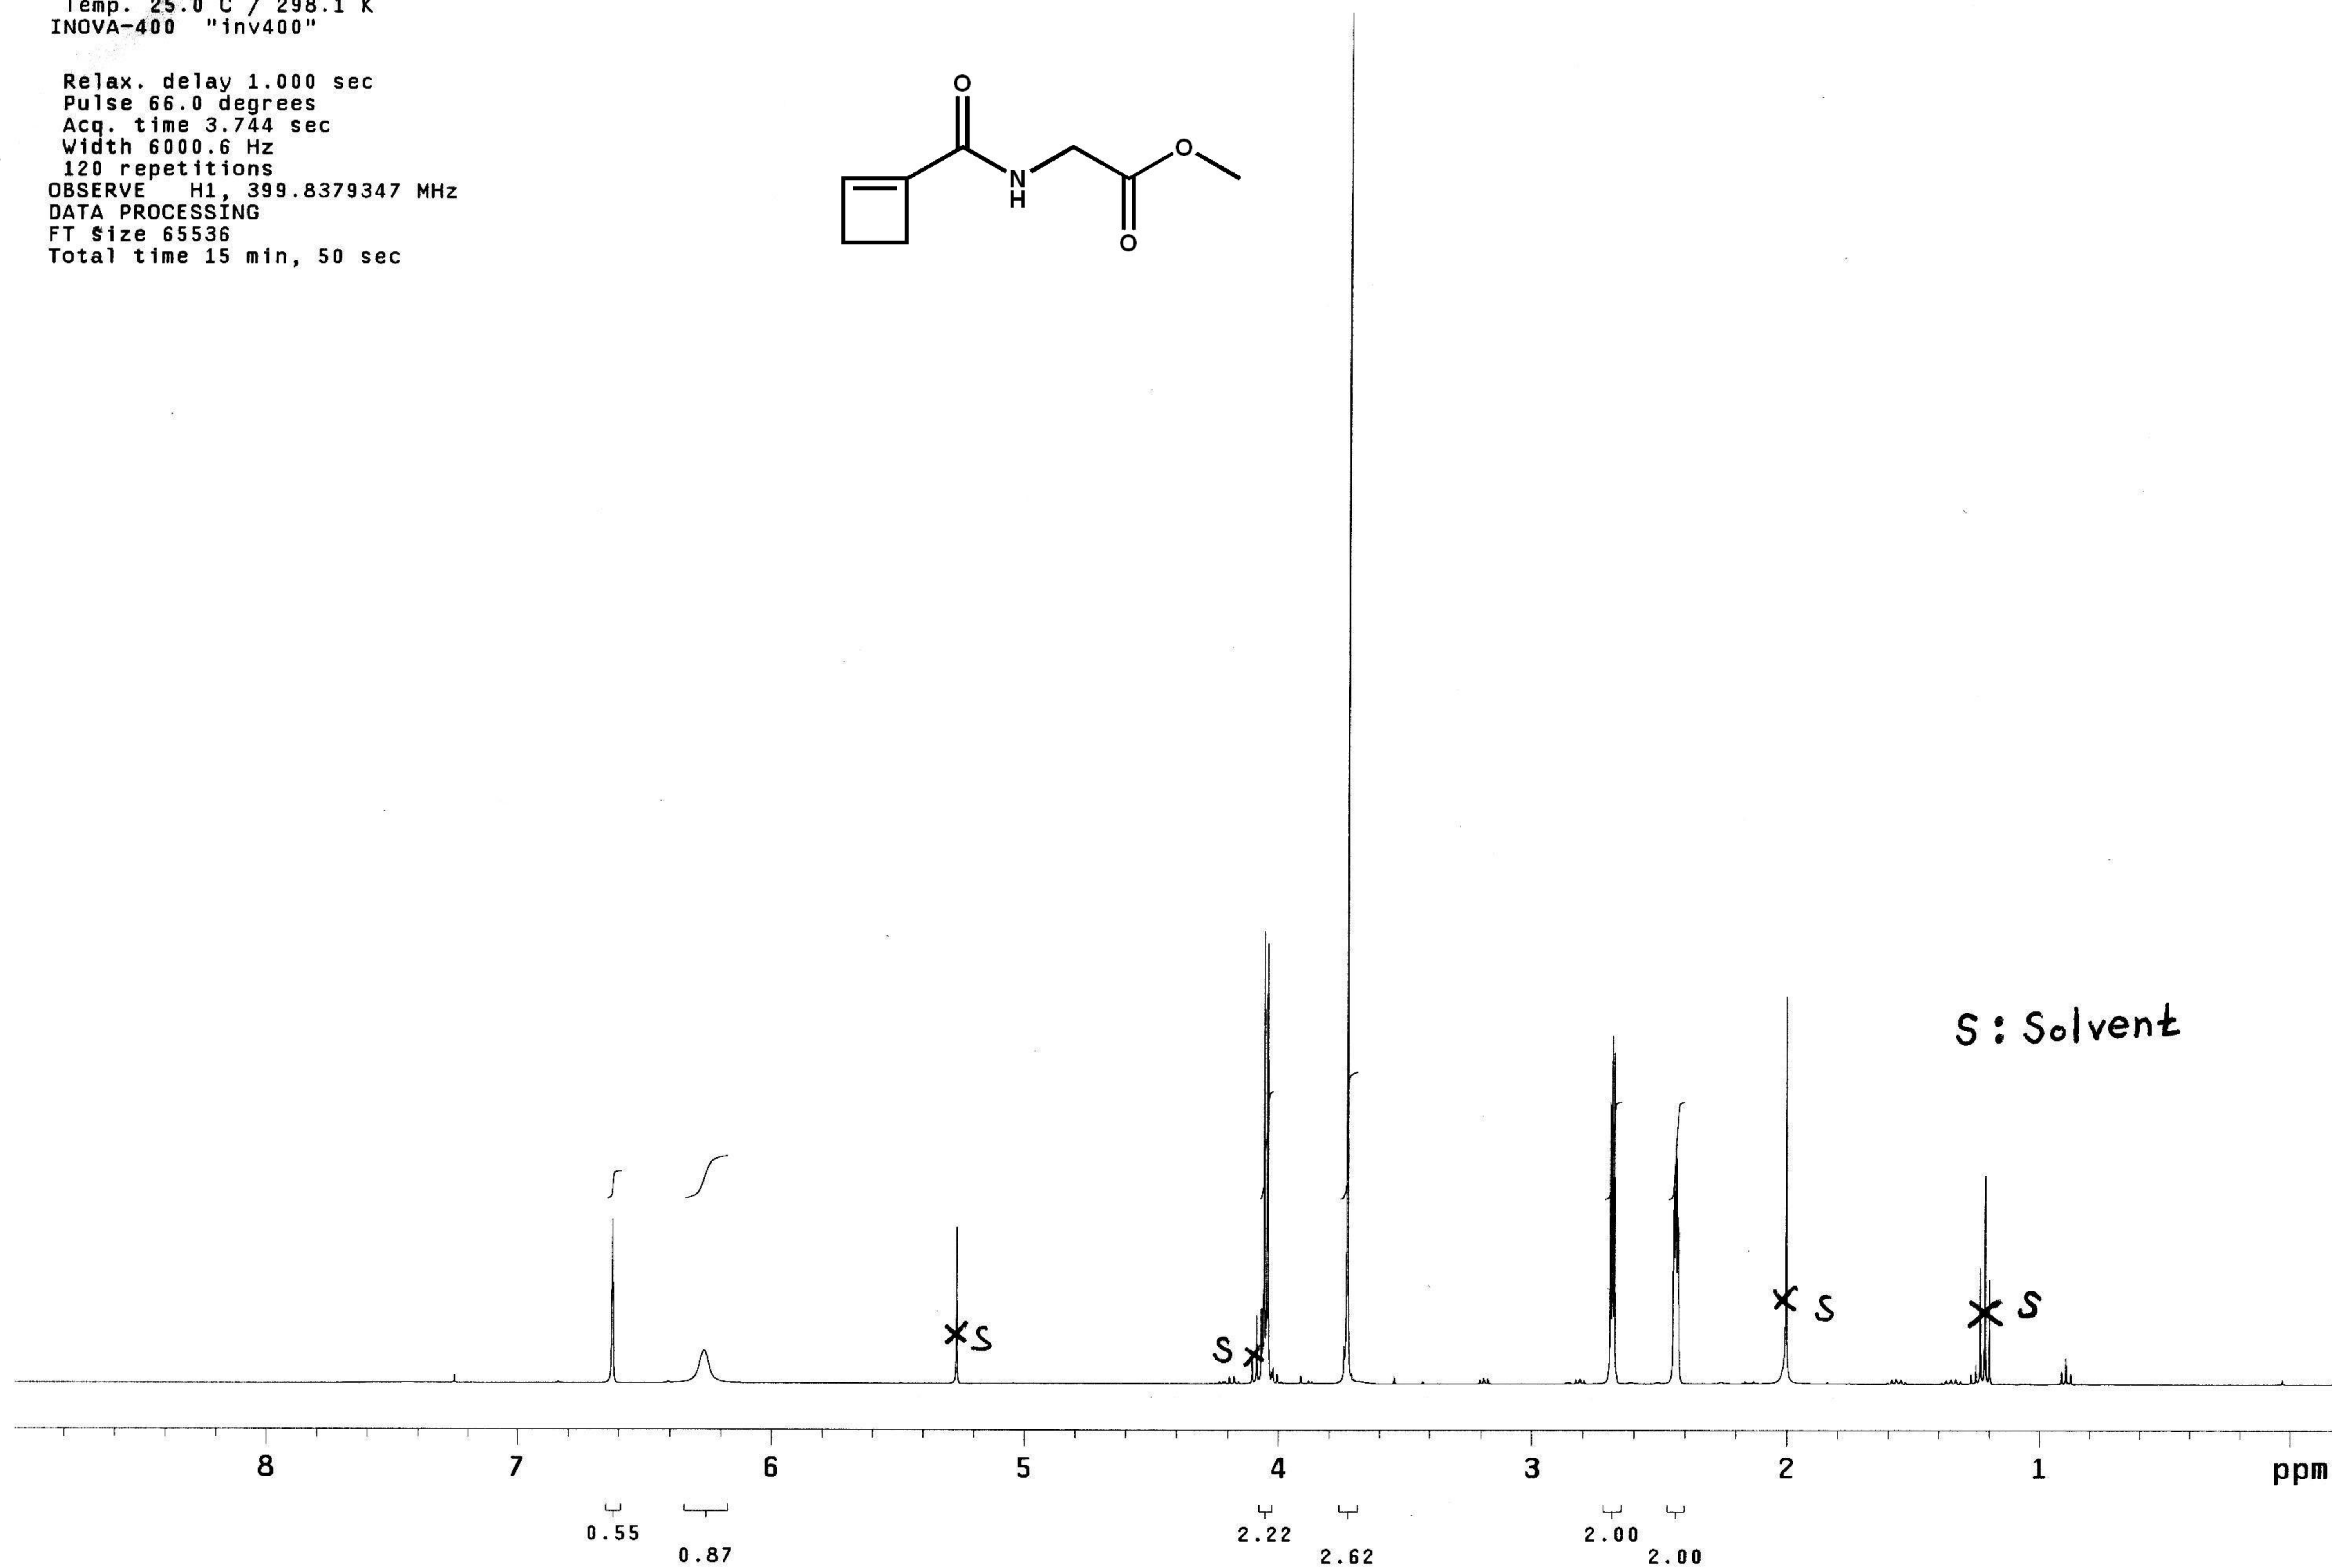

## 13C-NMR

062305-CyBuGlyOMe-C13

Pulse Sequence: s2pu1

Solvent: CDCl3

Temp. 25.0 C / 298.1 K

INOVA-400 "inv400"

Relax. delay 1.000 sec

Pulse 82.1 degrees

Acq. time 1.199 sec

Width 25000.0 Hz

5000 repetitions

OBSERVE C13, 100.5393098 MHz

DECOUPLE H1, 399.8399342 MHz

Power 45 dB

continuously on

WALTZ-16 modulated

DATA PROCESSING

Line broadening 1.0 Hz

FT size 65536

Total time 3 hr, 4 min, 1 sec

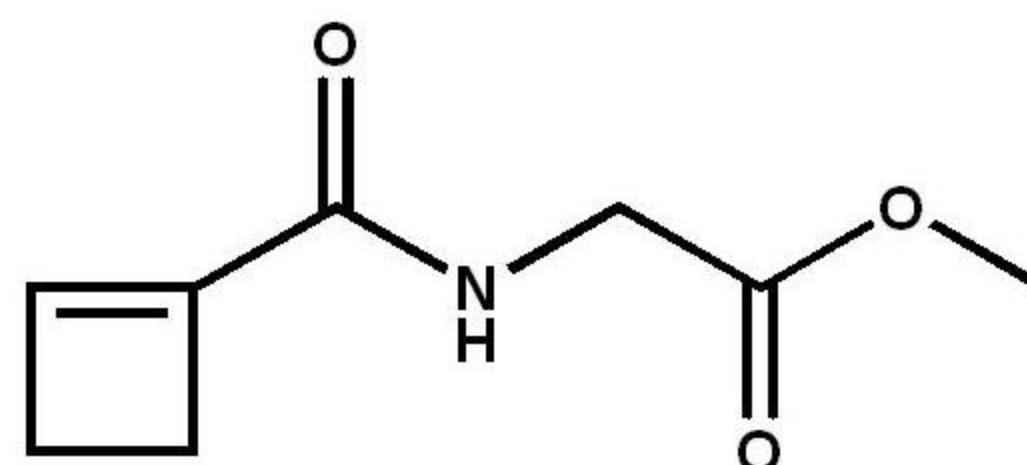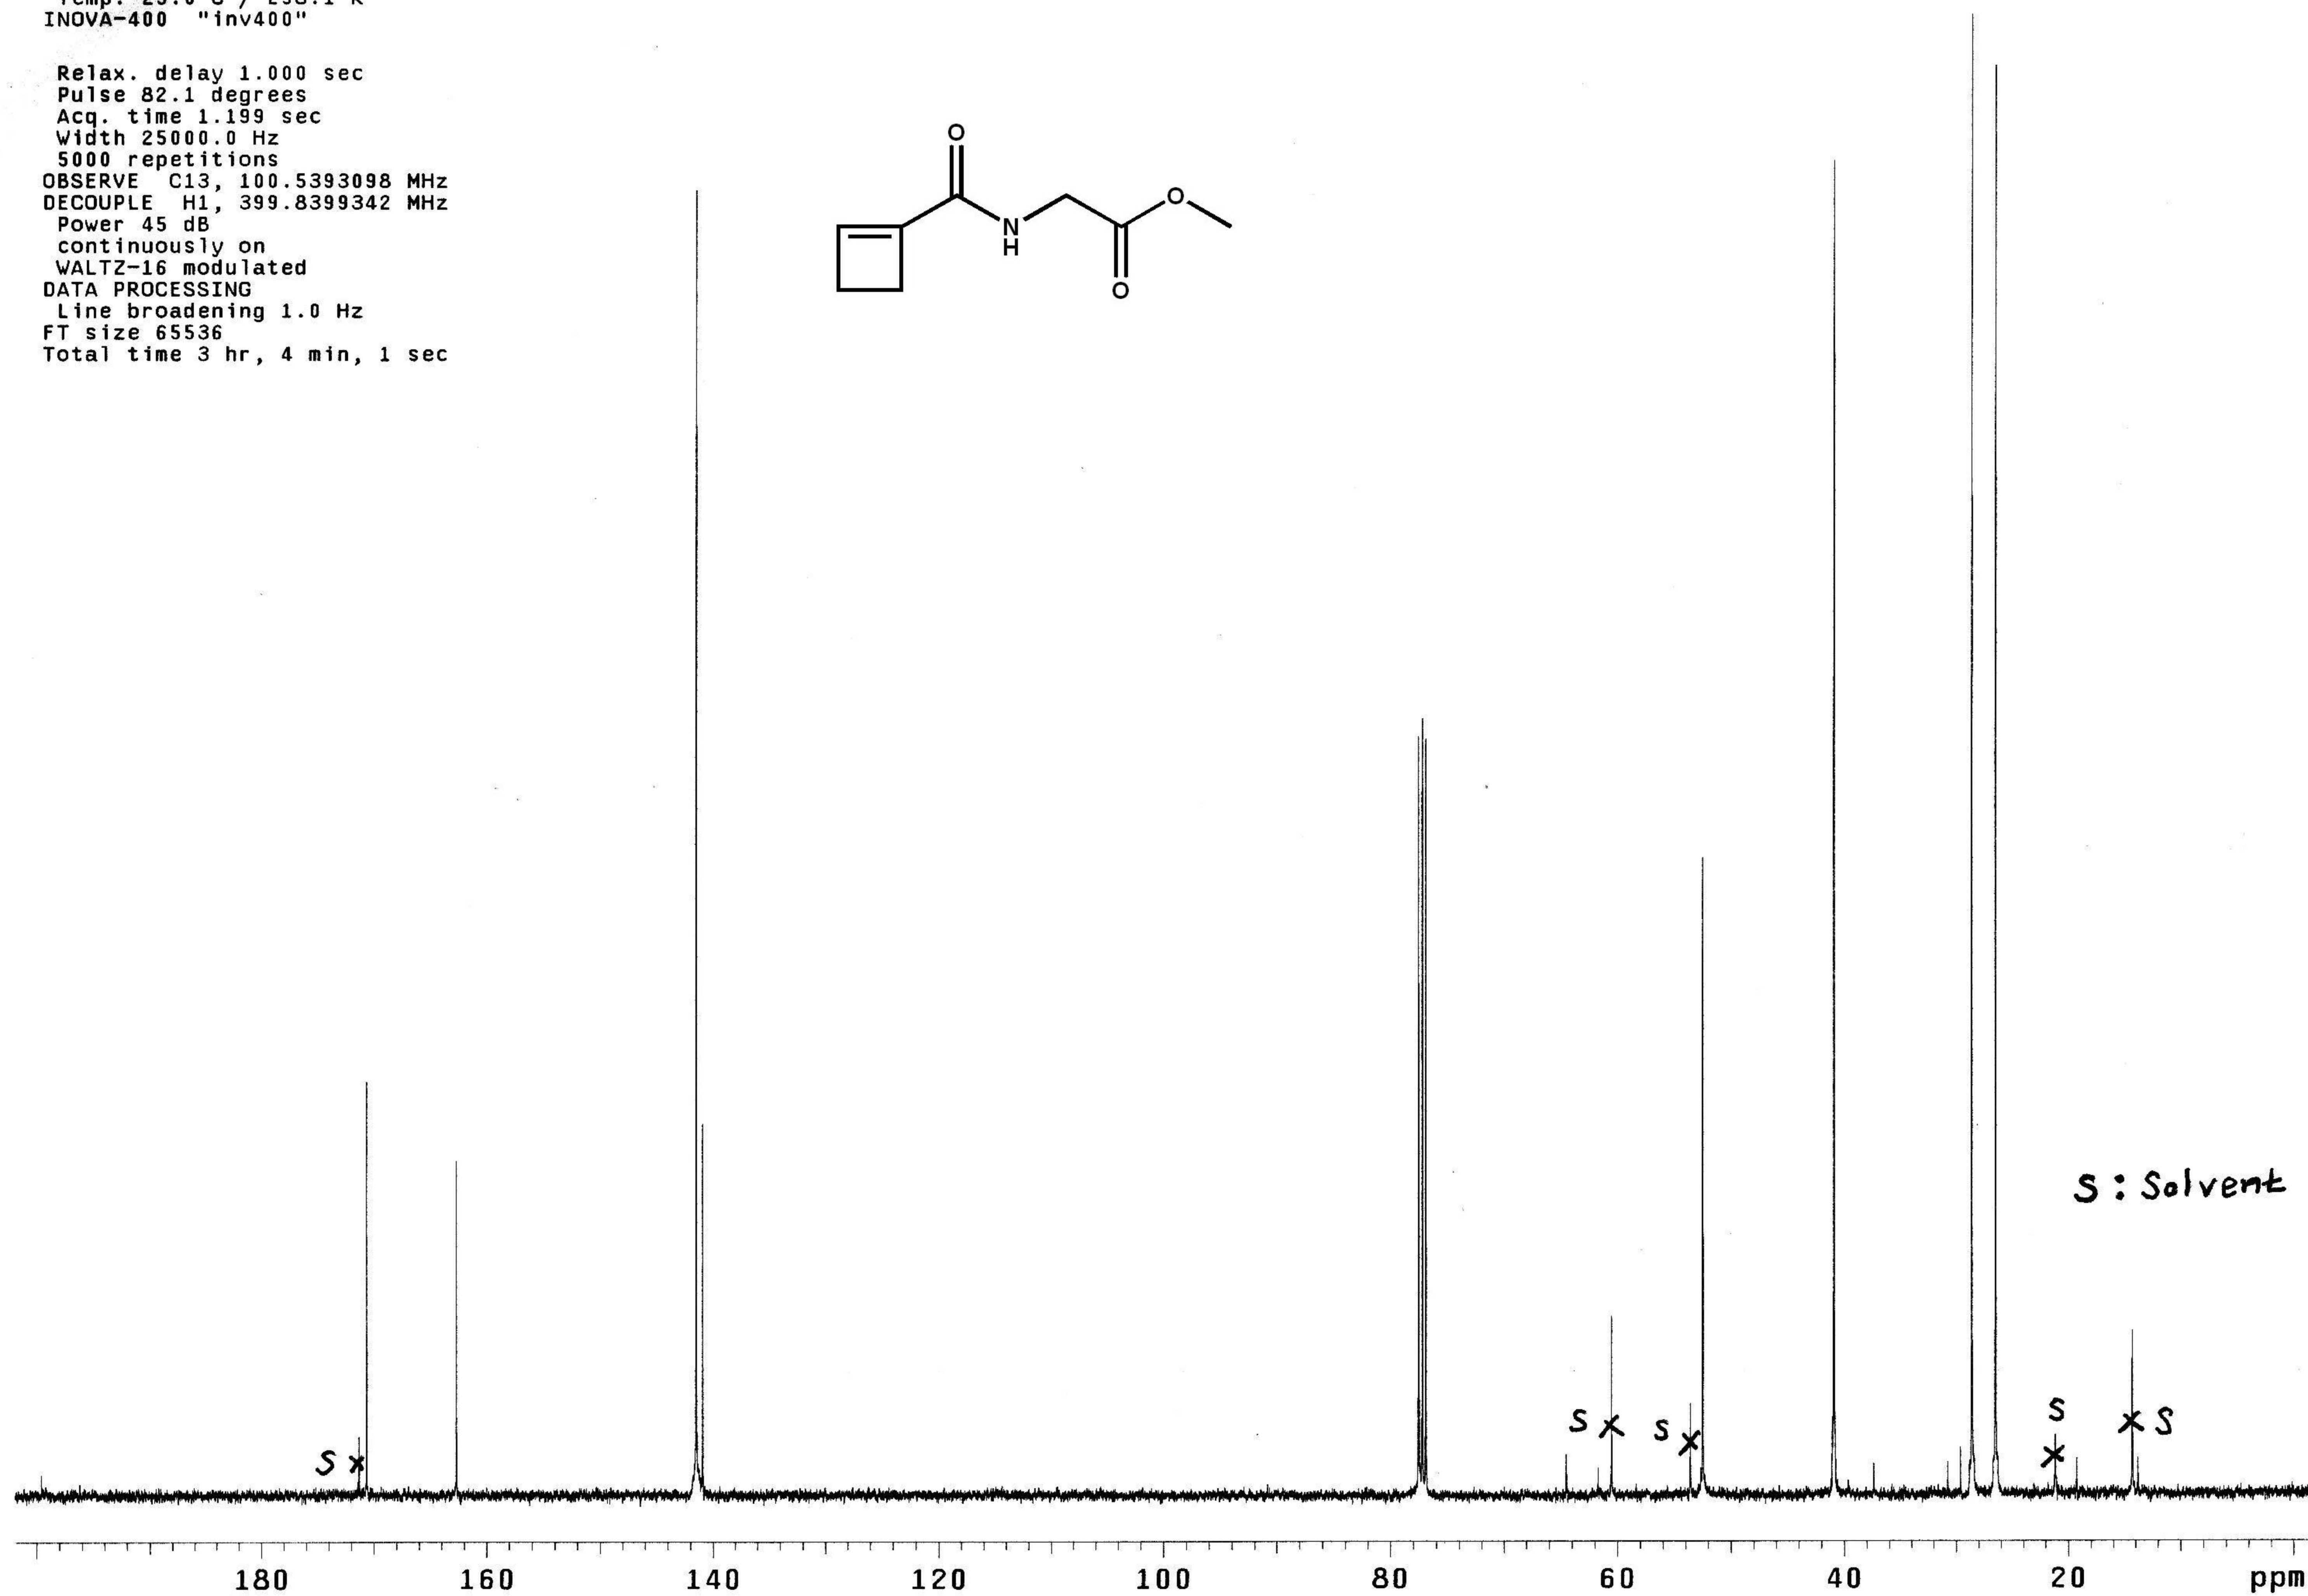

## 1H-NMR spectrum of ROM One-mer

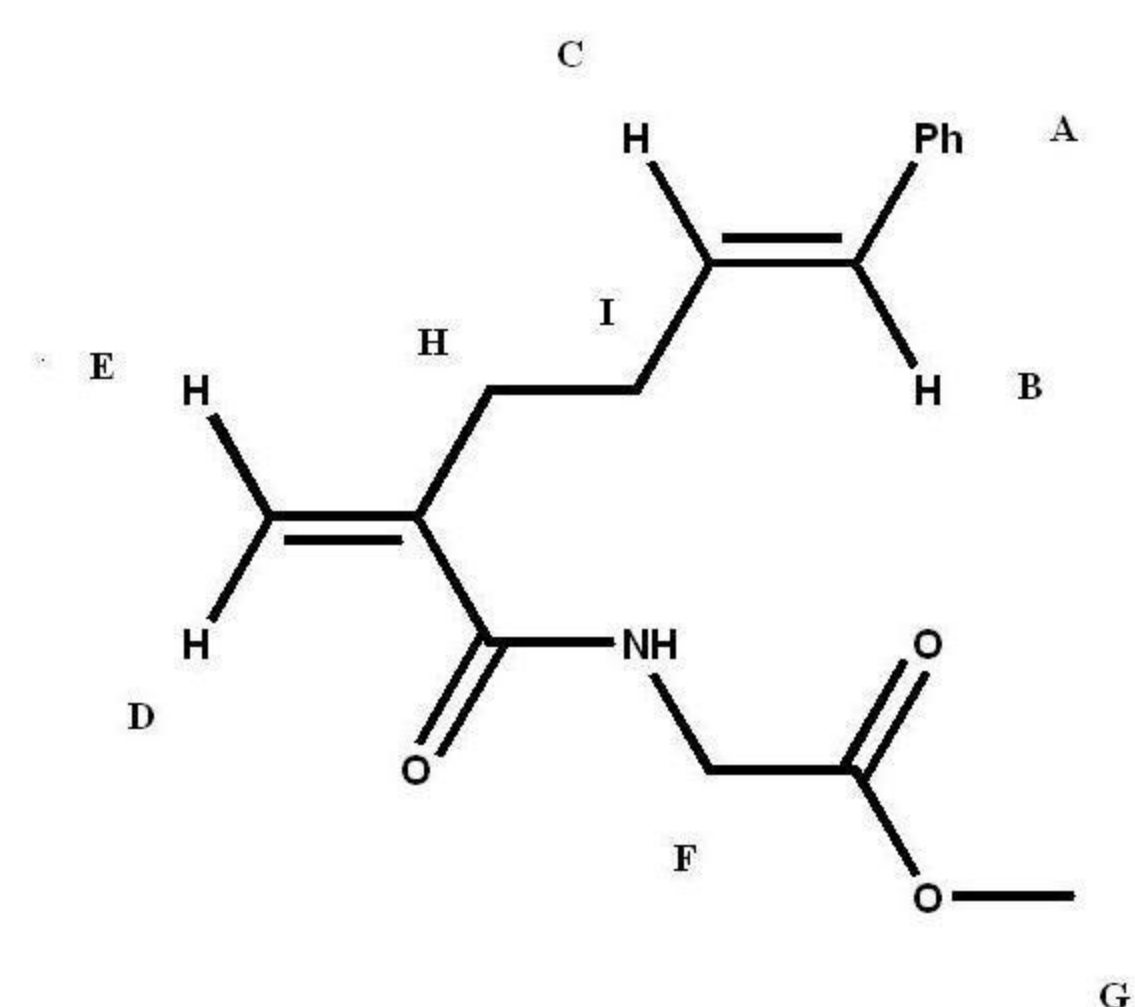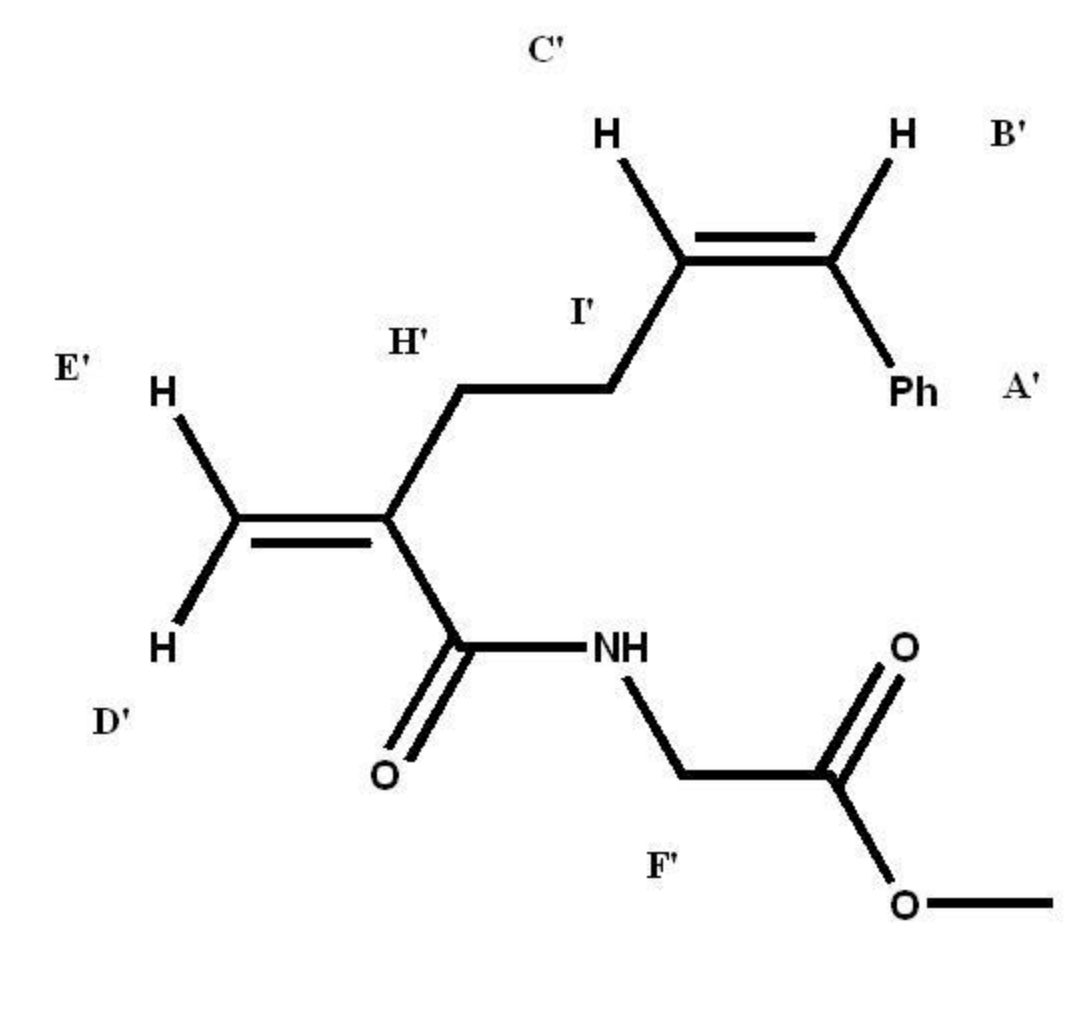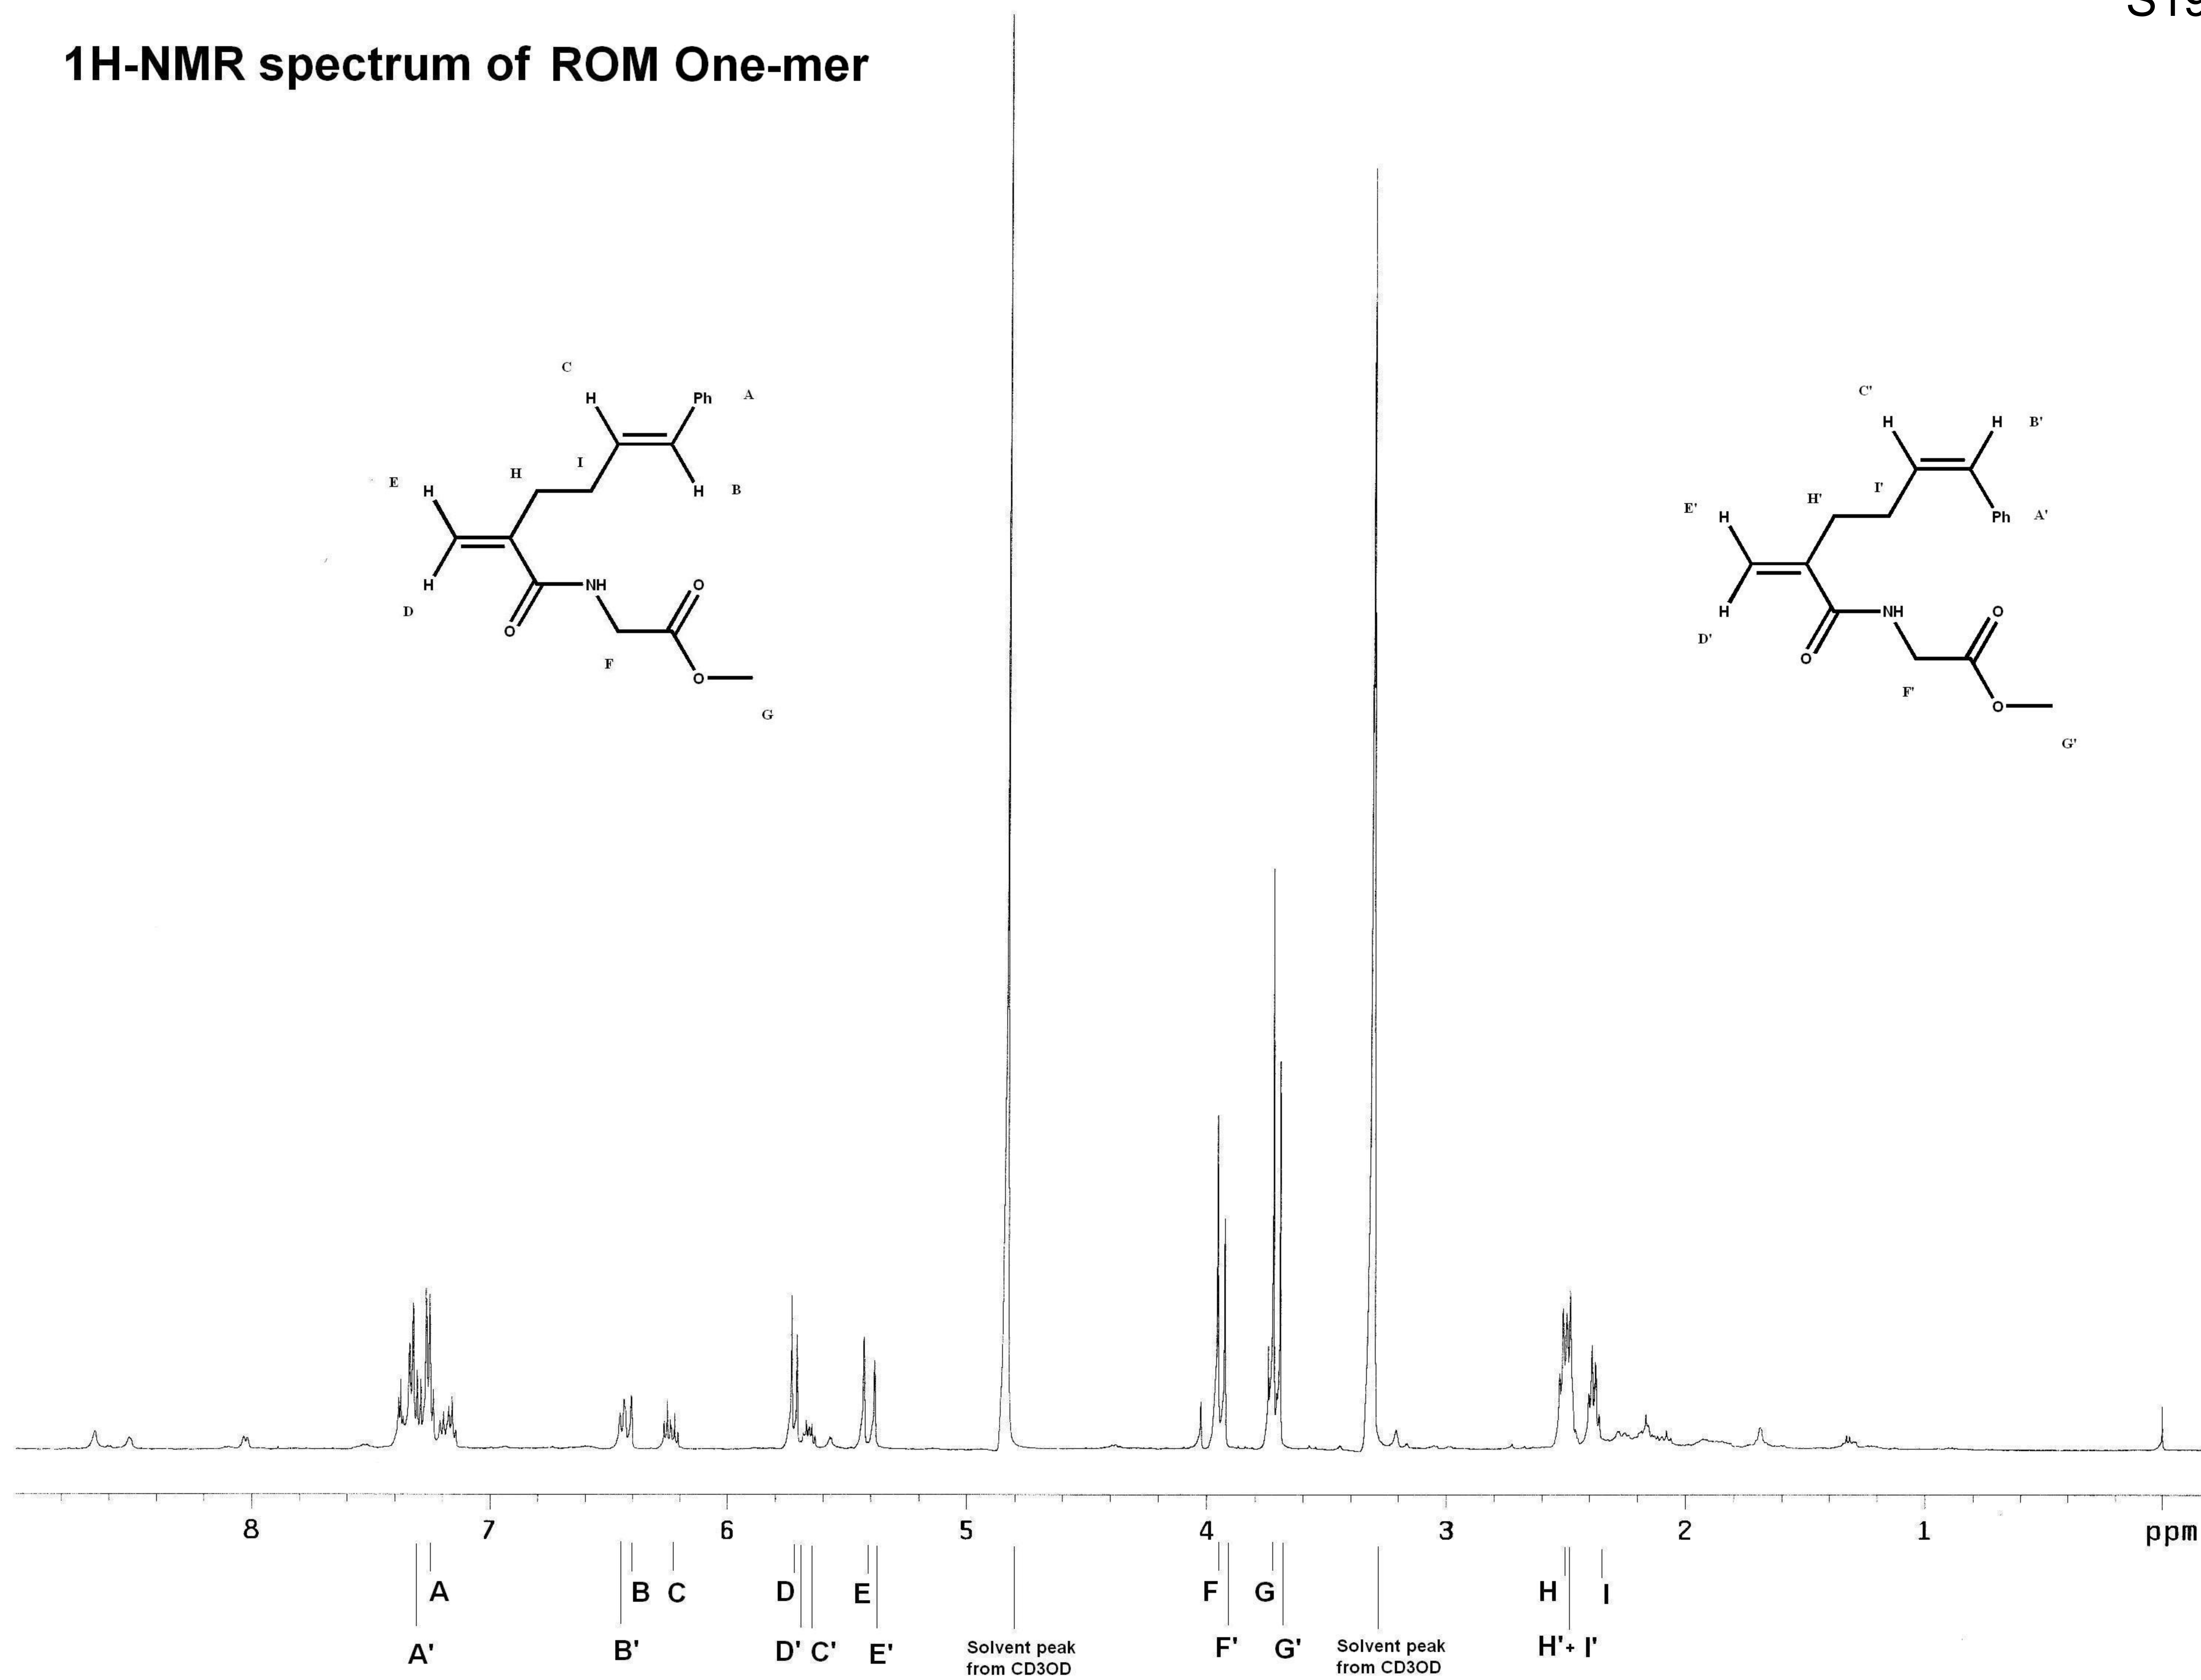



## gCOSY spectrum of ROM One-mer

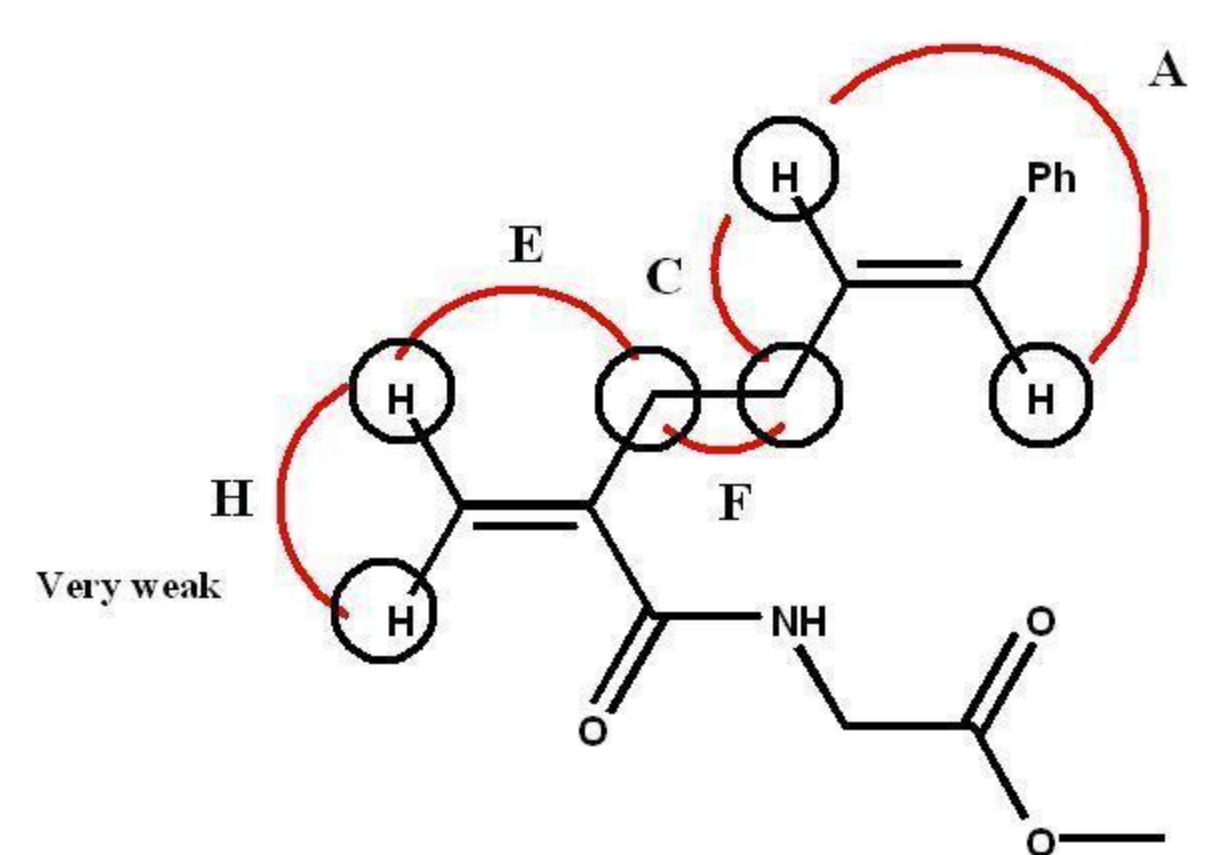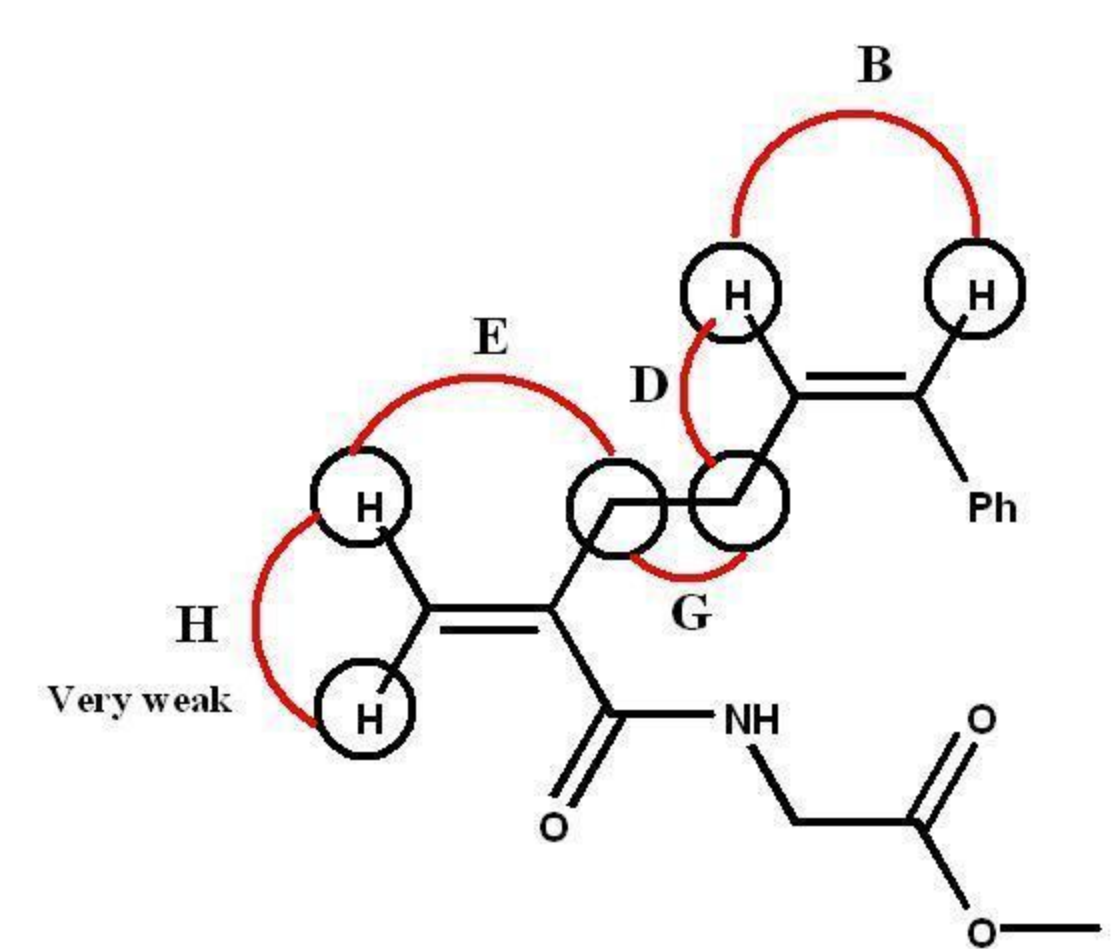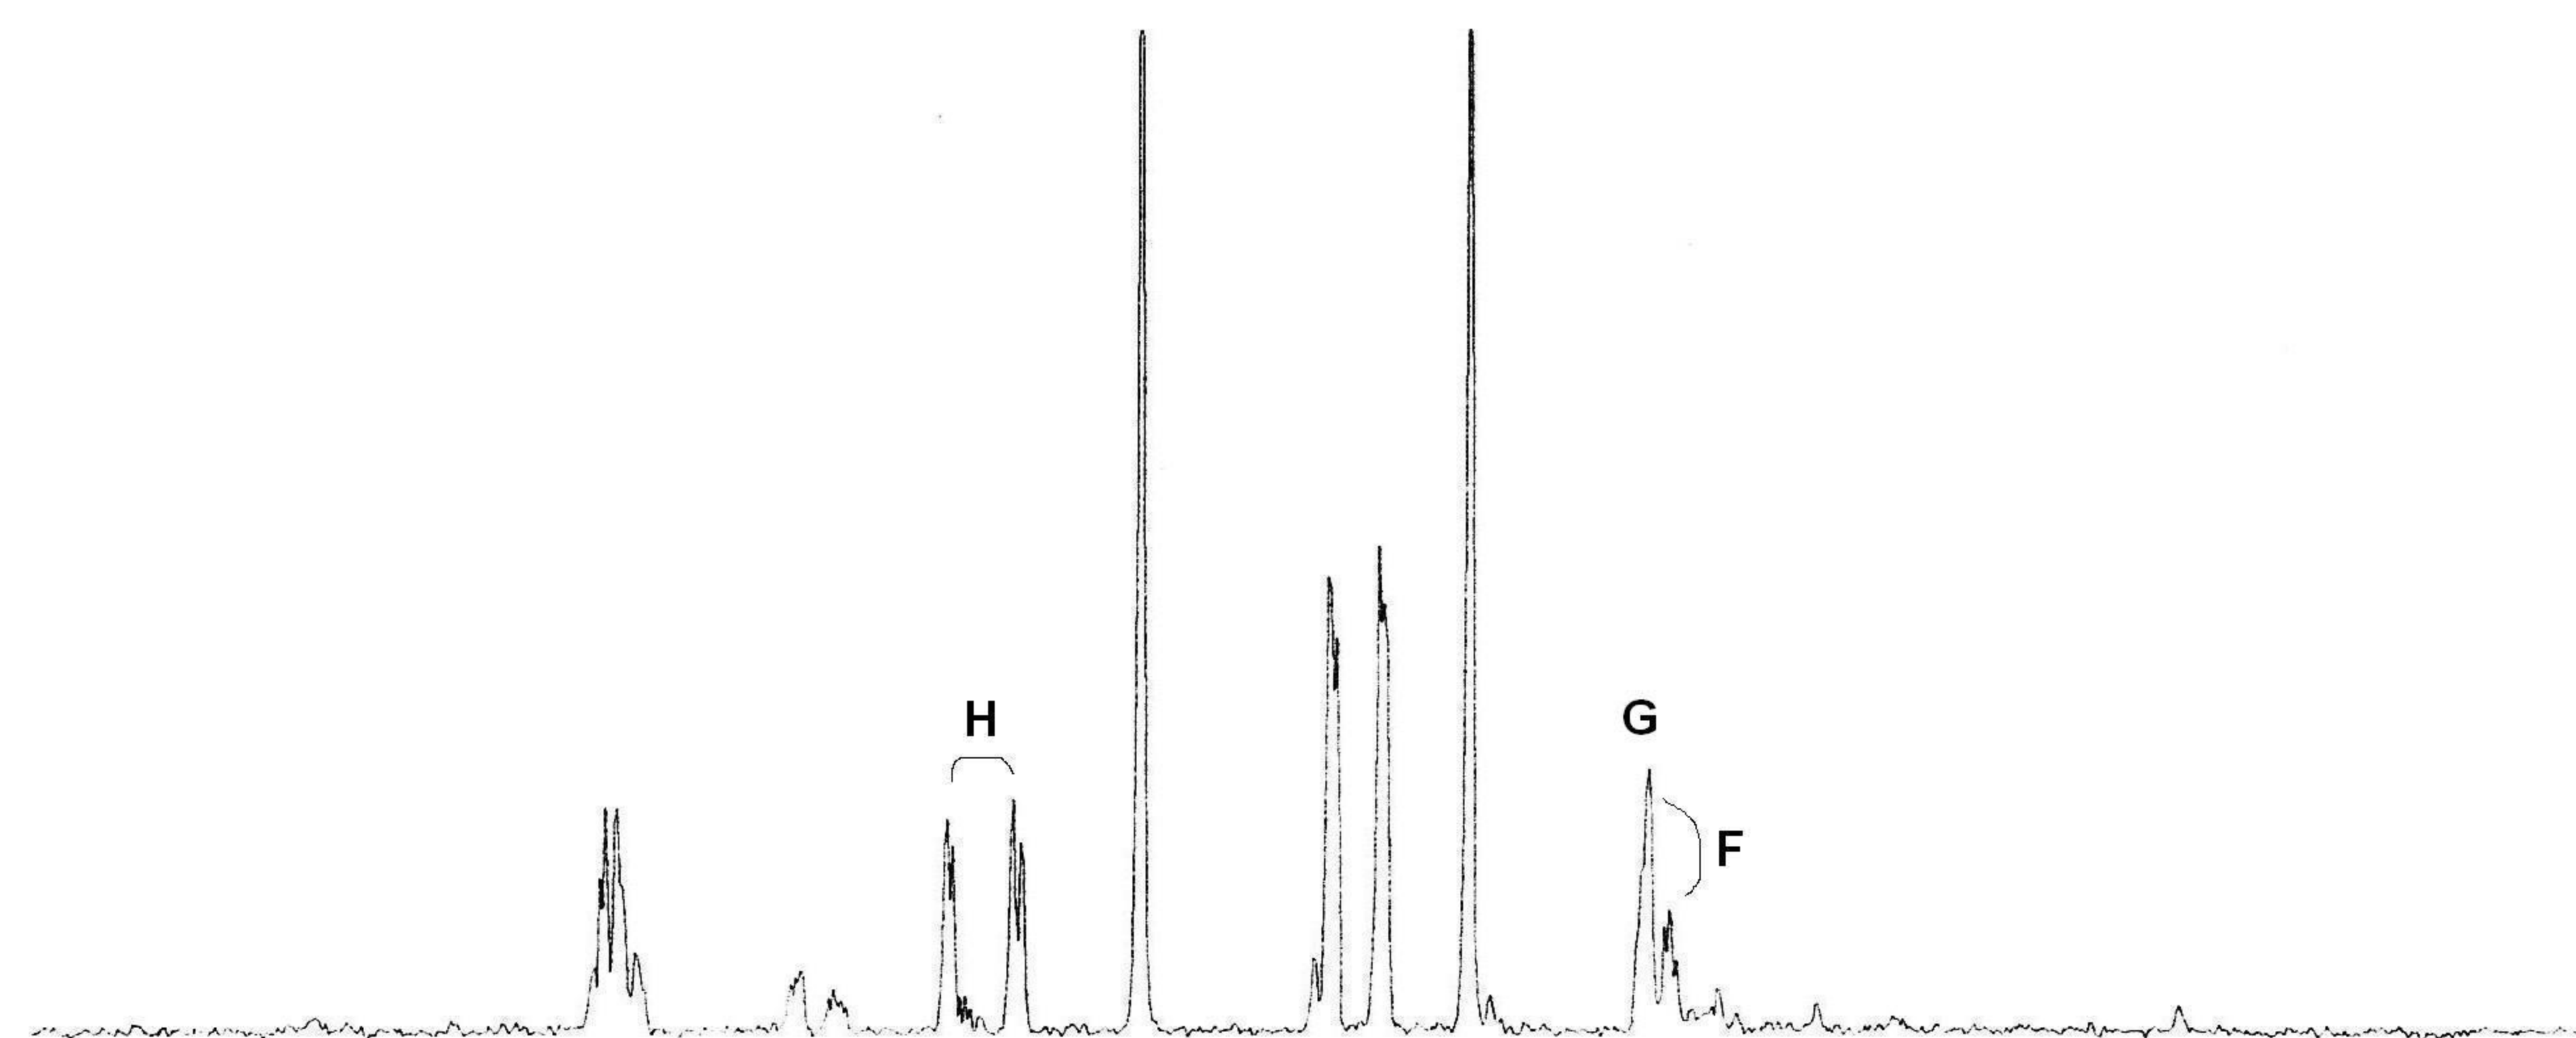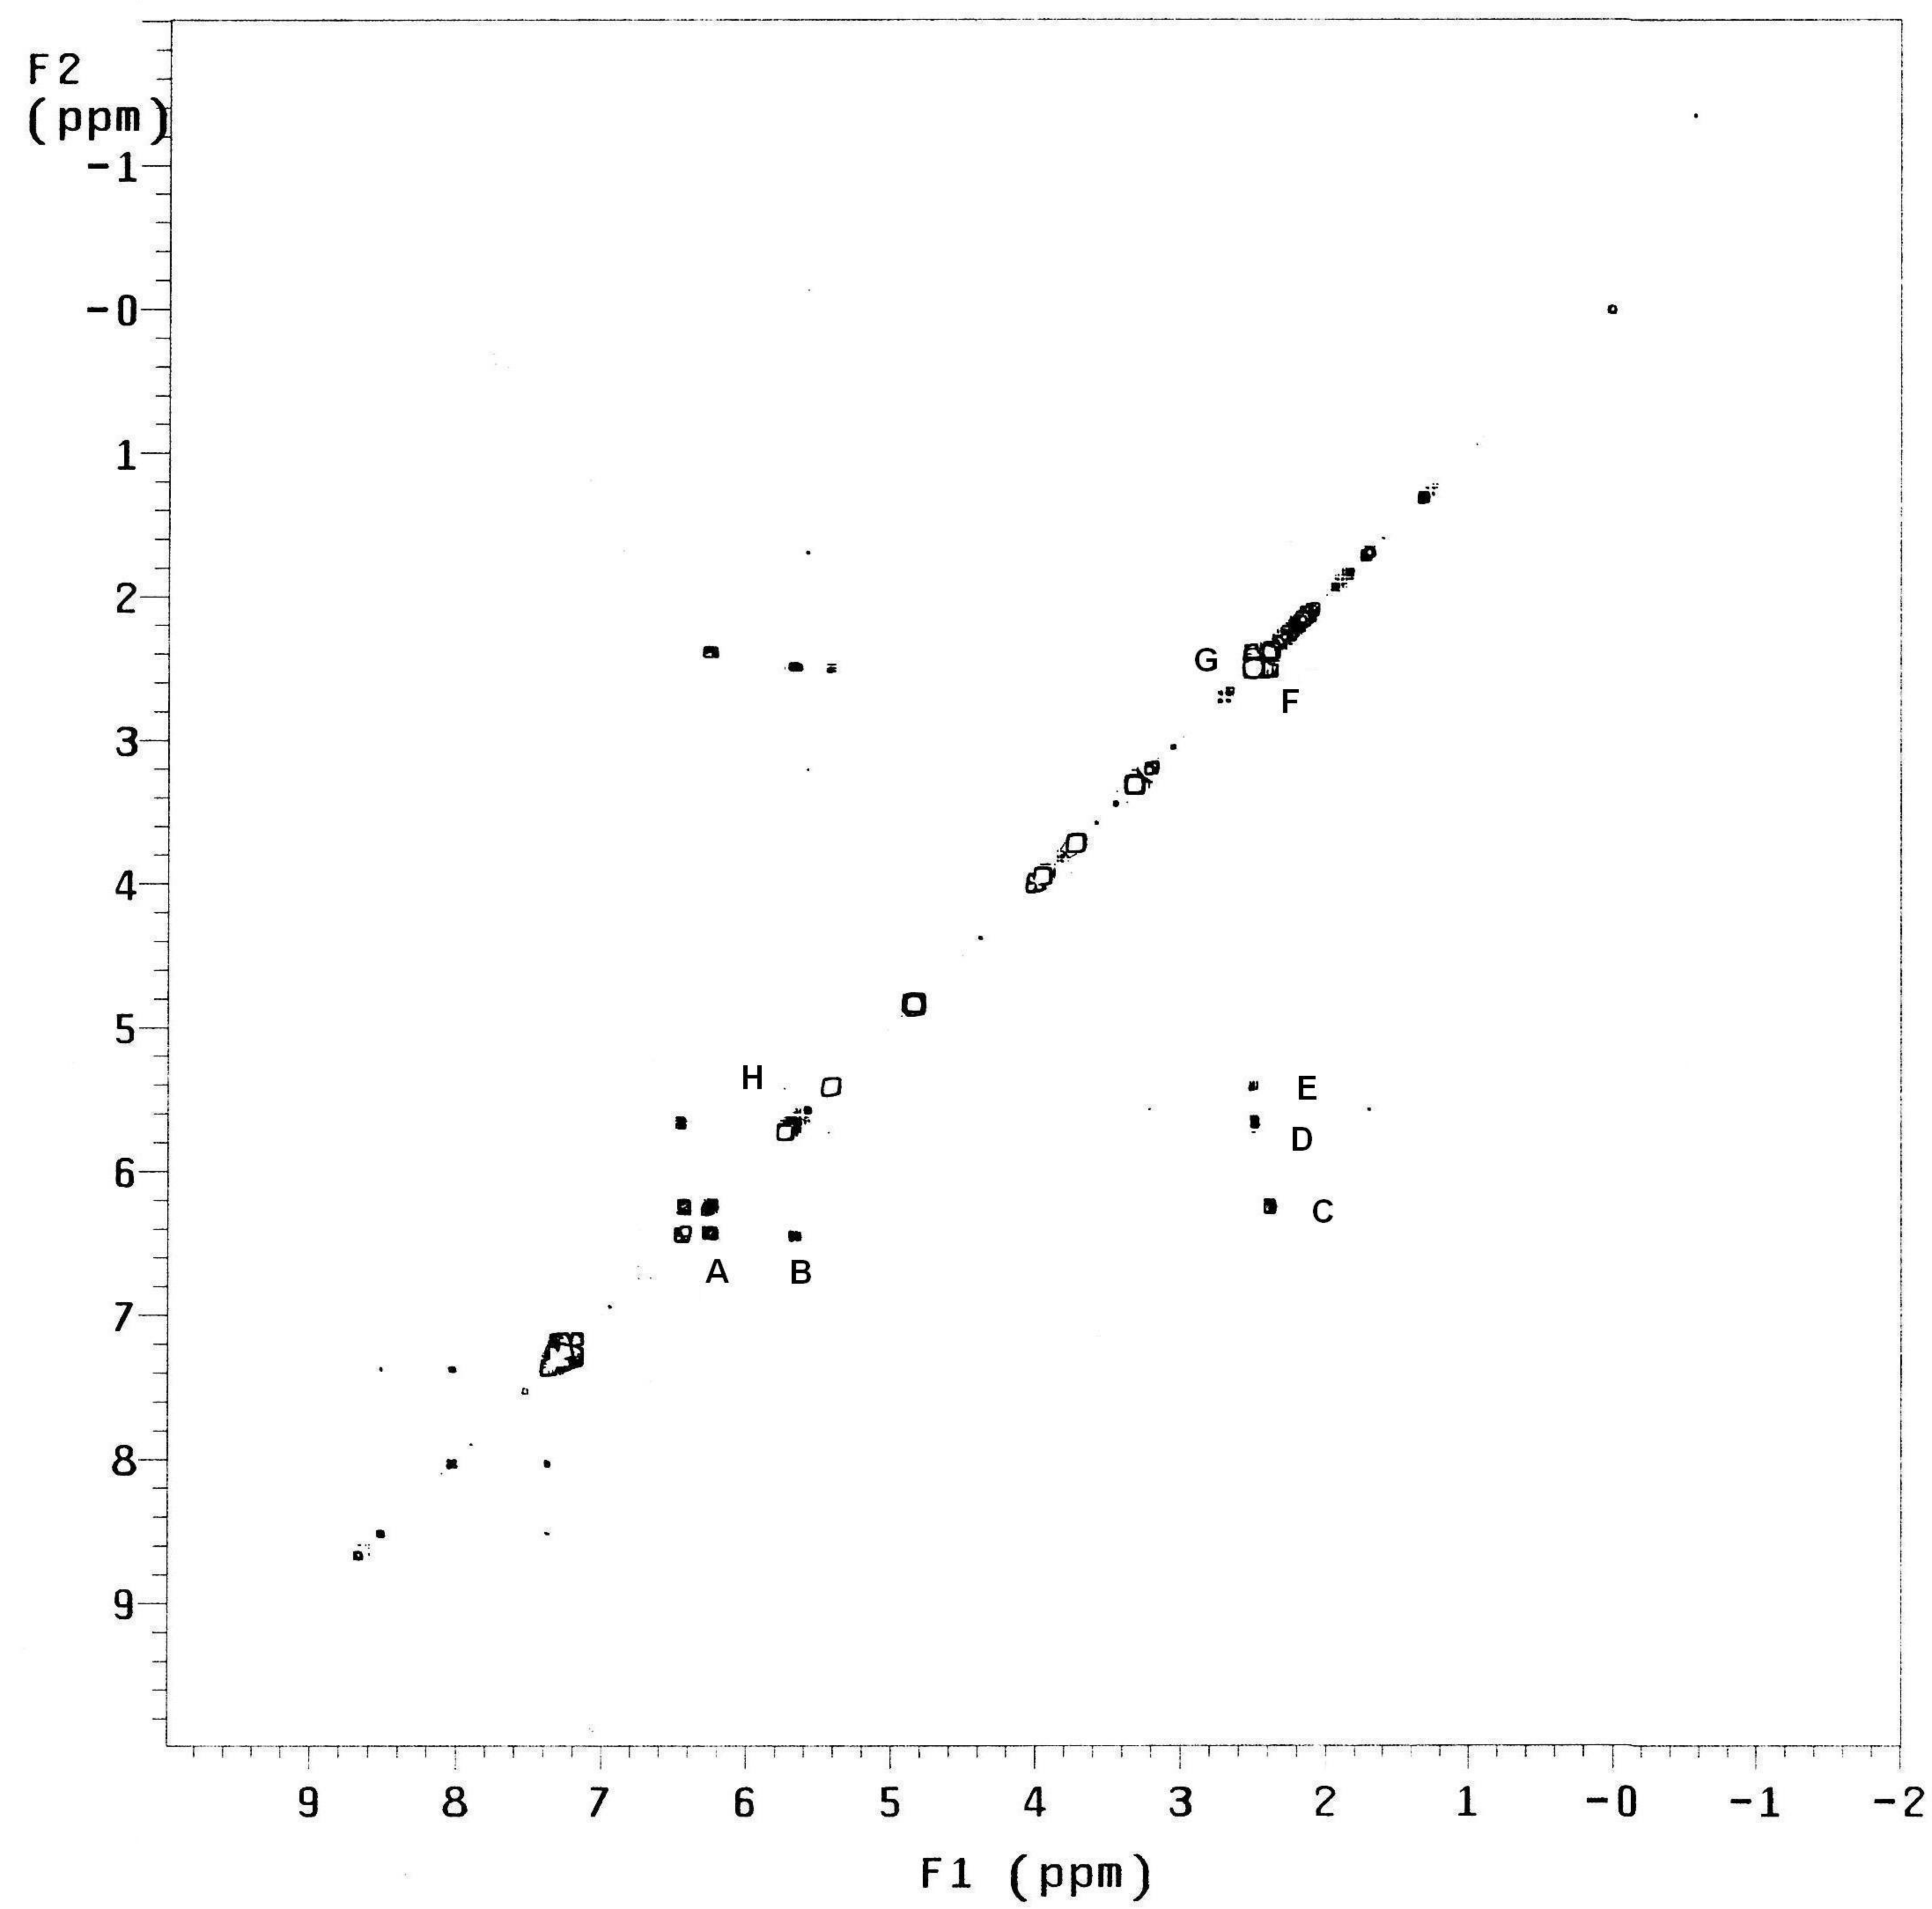



CyBuGlyOMe-ROM-One-mer-combined

Pulse Sequence: s2pu1

Solvent: CD3OD  
Temp. 25.0 C / 298.1 K

INOVA-400 "inv400"

Relax. delay 1.000 sec  
Pulse 82.1 degrees  
Acq. time 1.199 sec  
Width 25000.0 Hz  
19552 repetitions  
OBSERVE C13, 100.5395658 MHz  
DECOUPLE H1, 399.8415095 MHz  
Power 47 dB  
continuously on  
WALTZ-16 modulated  
DATA PROCESSING  
Line broadening 1.0 Hz  
FT size 65536  
Total time 12 hr, 16 min, 4 sec

# **<sup>13</sup>C-NMR spectrum of ROM One-mer**

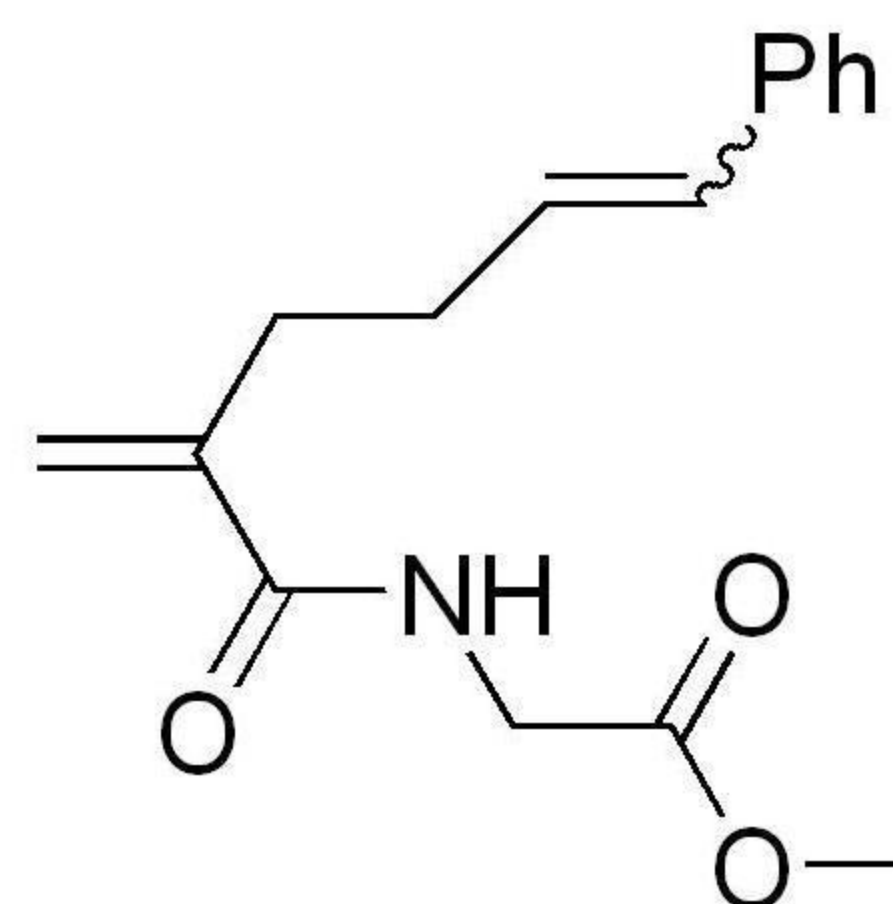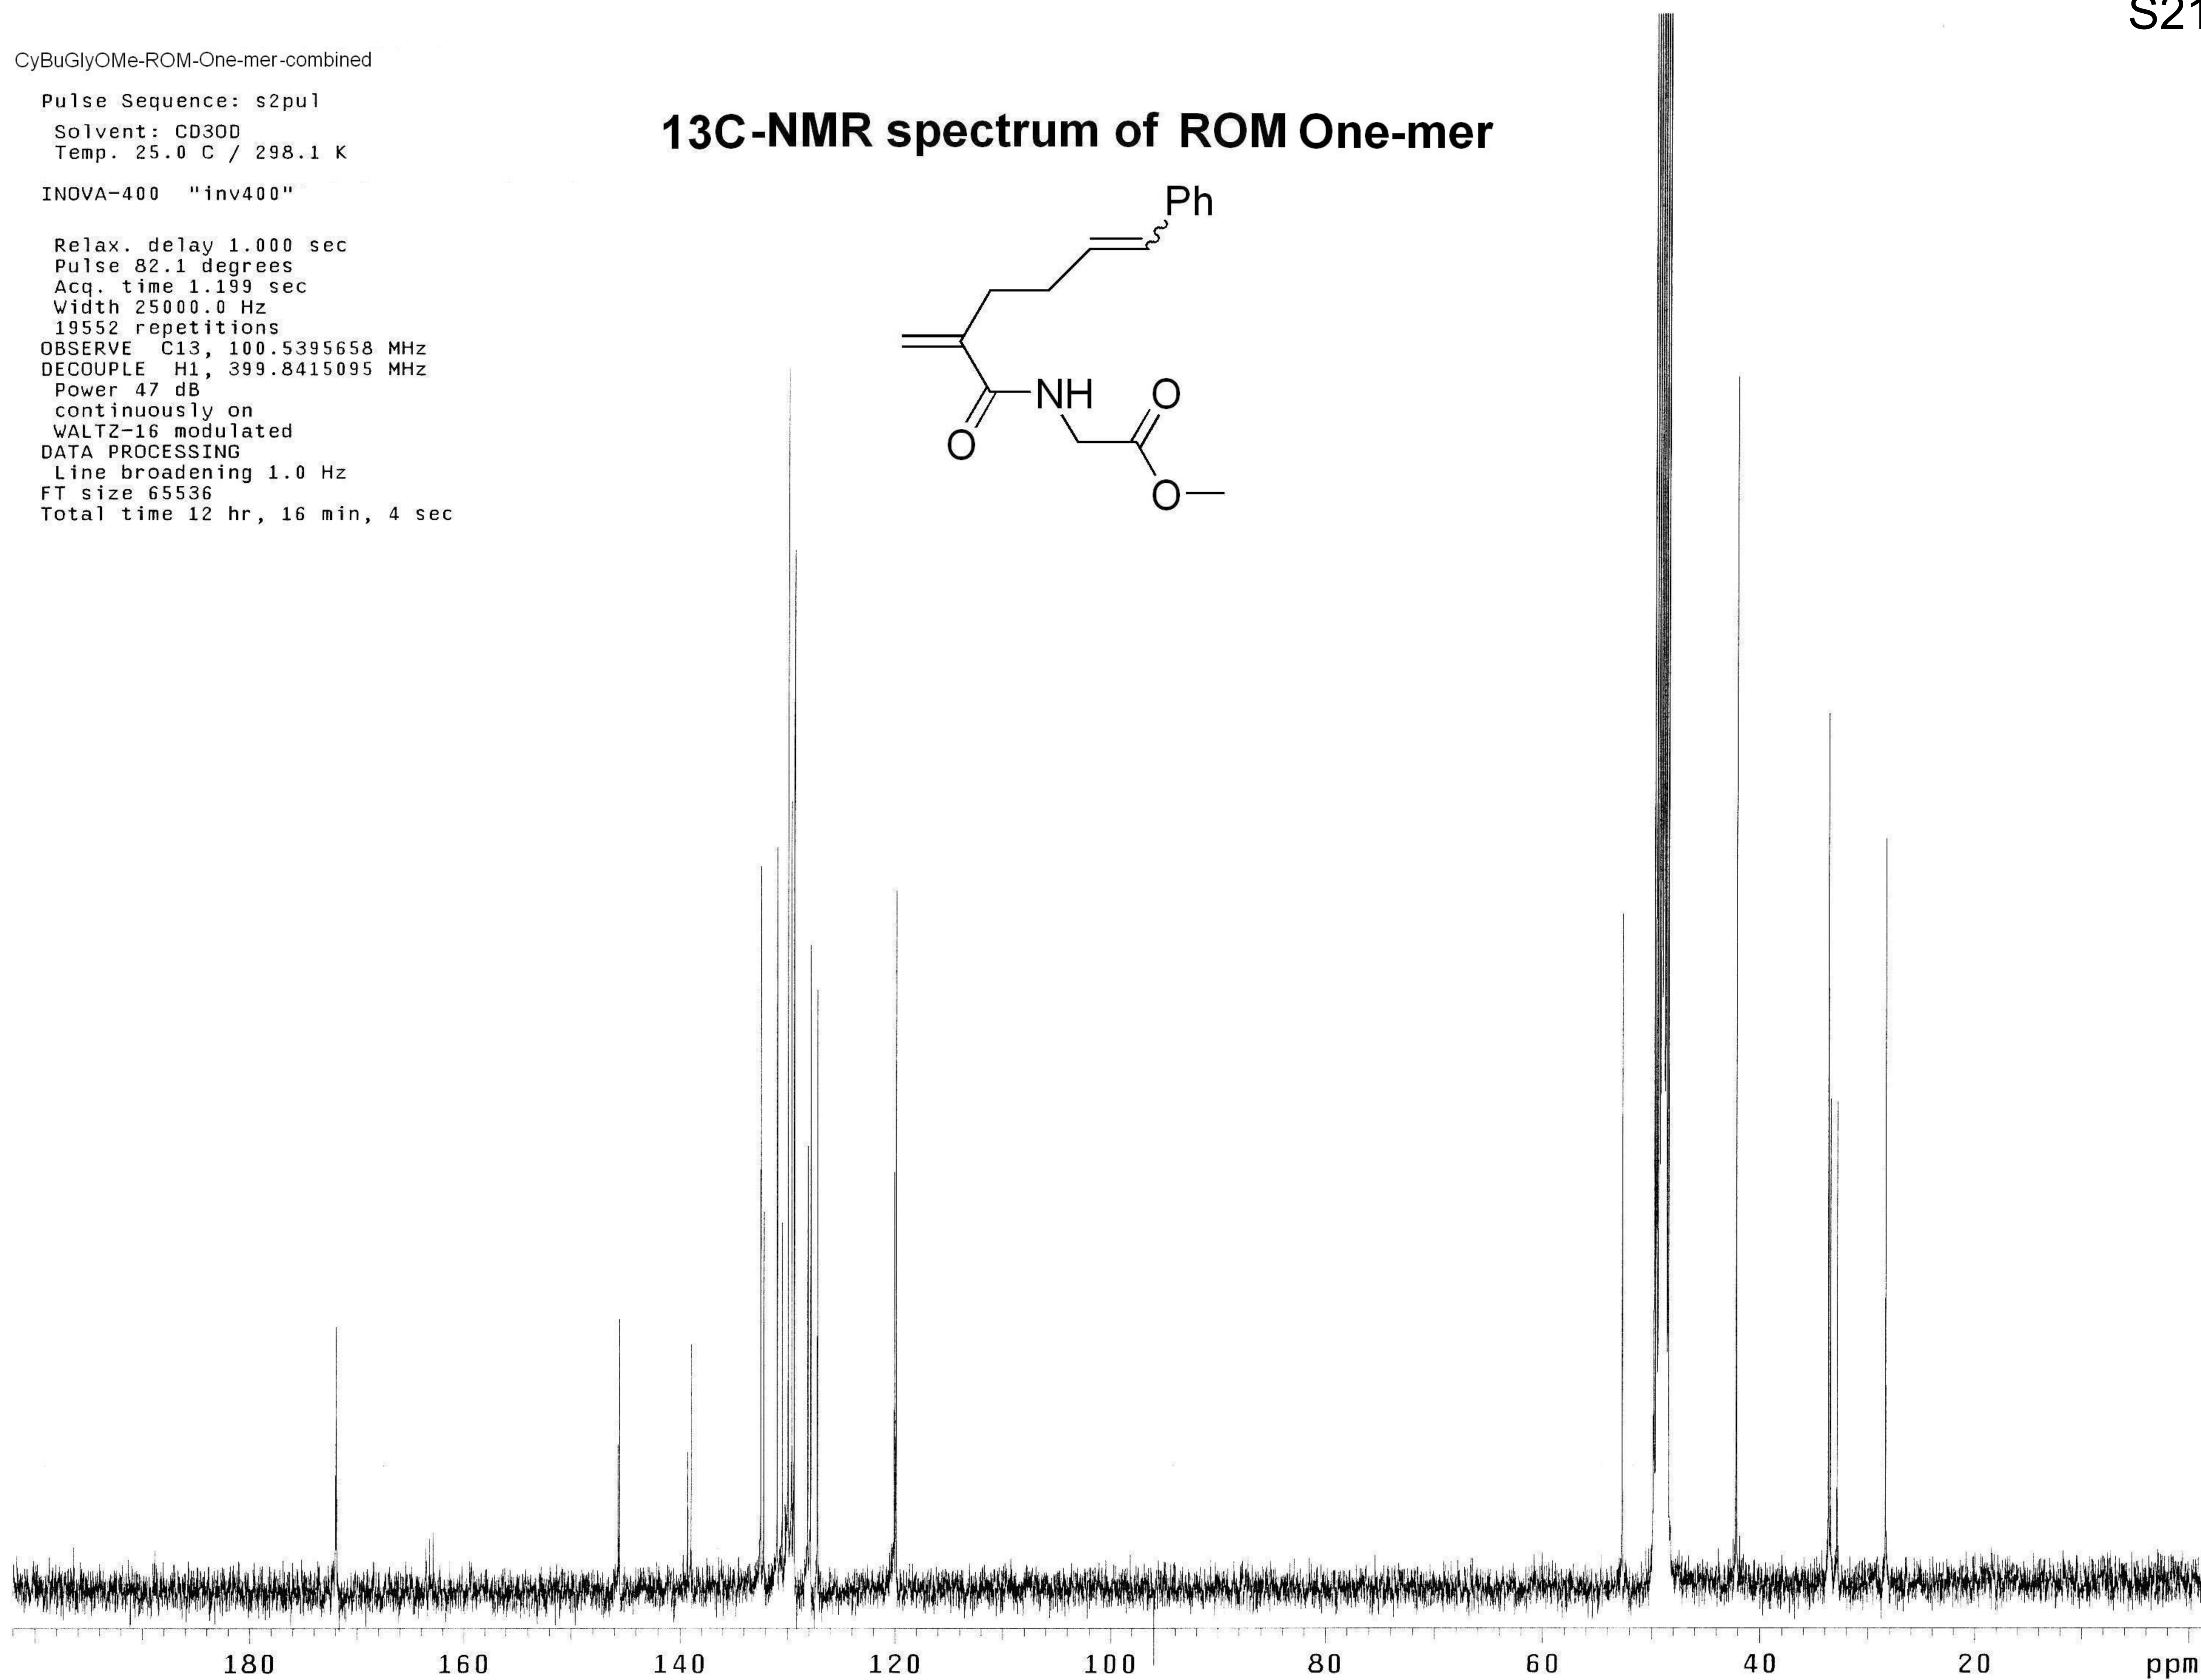

061705-CyBuGlyOMe-10mer-Purified

Pulse Sequence: s2pu1

Solvent: CD<sub>2</sub>Cl<sub>2</sub> + CD<sub>3</sub>OD (1:1)

Temp. 25.0 C / 298.1 K

File: 061705-CyBuGlyOMe-10mer-Purified

INOVA-500 "inv500"

Relax. delay 1.000 sec

Pulse 80.8 degrees

Acq. time 1.892 sec

Width 8000.0 Hz

168 repetitions

OBSERVE H1, 499.8964828 MHz

DATA PROCESSING

FT size 32768

Total time 9 min, 40 sec

# 1H-NMR

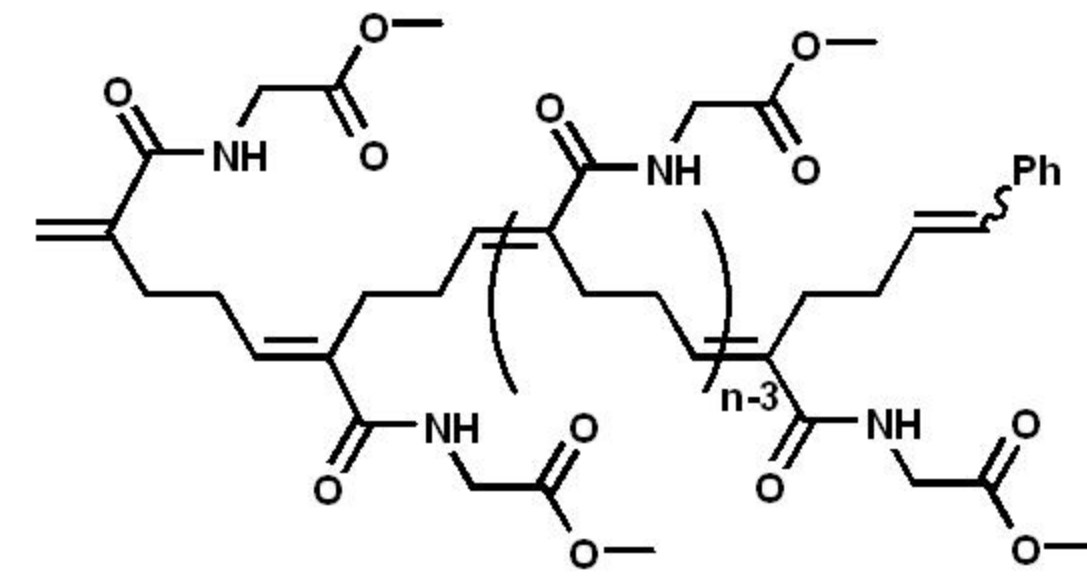

**10-mer, n=10**

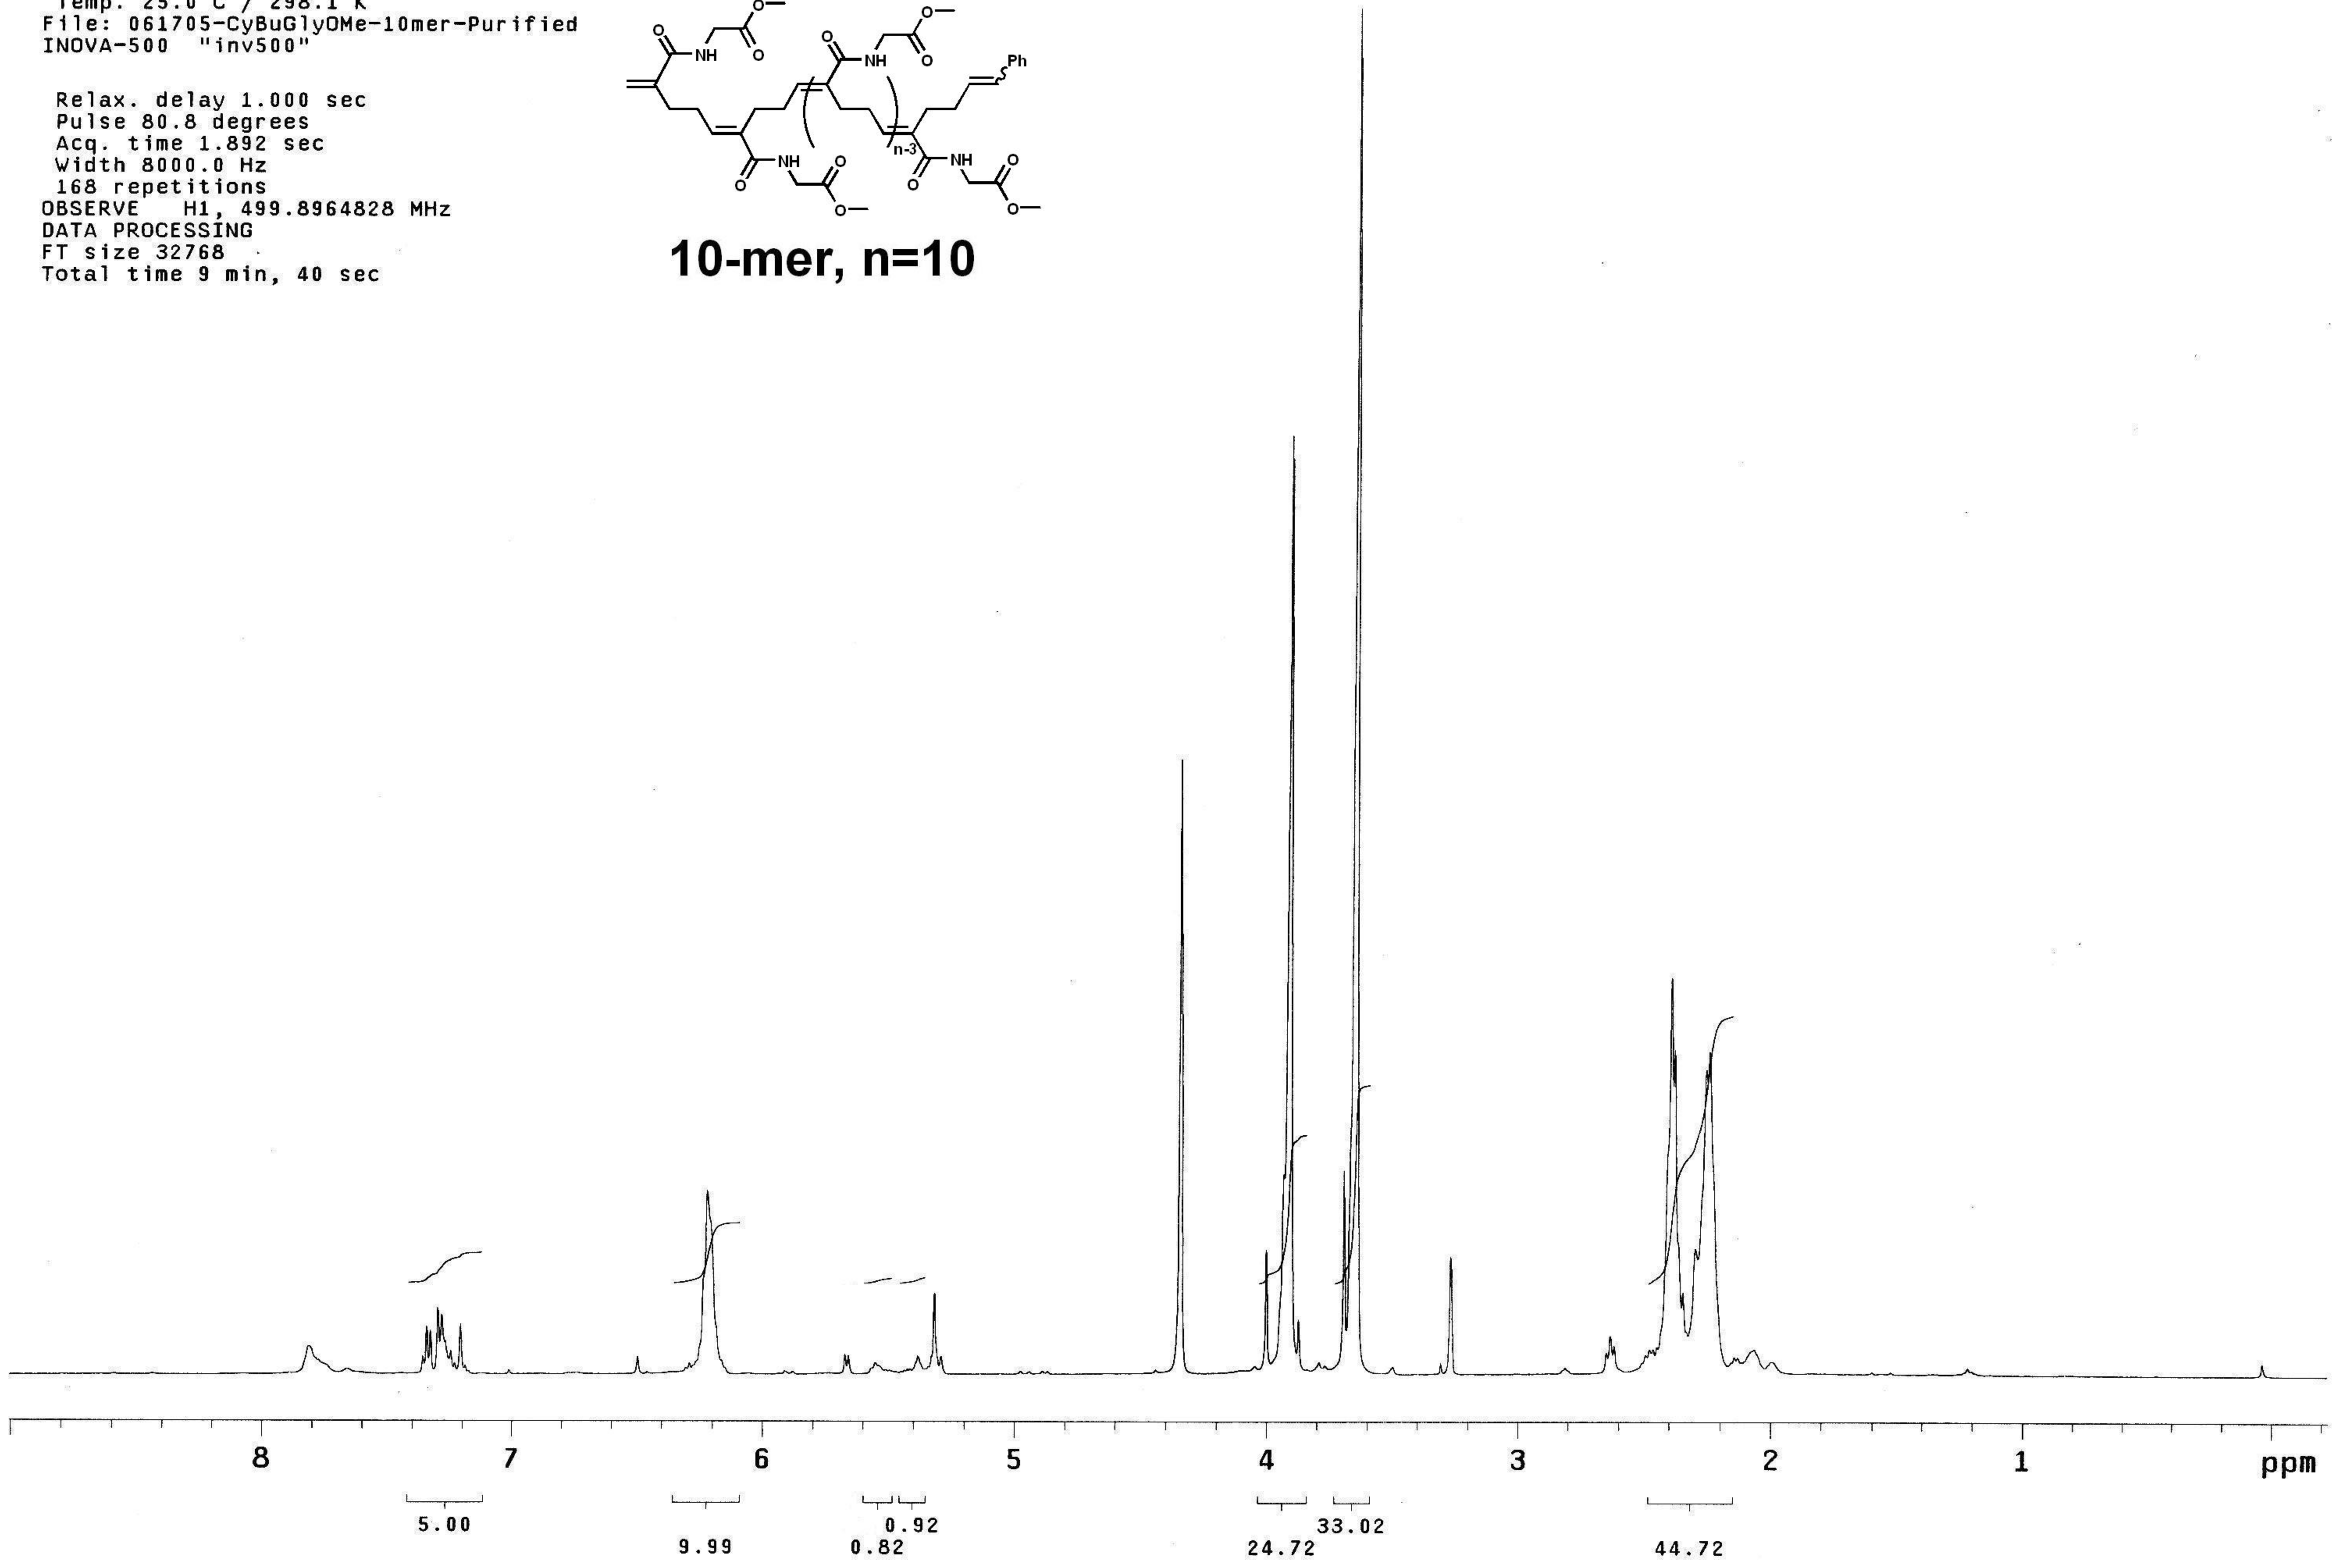

061705-CyBuGlyOMe- ROMP Rxn-Purified

**1H-NMR**

Pulse Sequence: s2pu1

Solvent: CD<sub>2</sub>C<sub>12</sub> + CD<sub>3</sub>OD (1:1)  
Temp. 25.0 C / 298.1 K  
File: 061705-CyBuGlyOMe- ROMP Rxn-Purified  
INOVA-500 "inv500"

Relax. delay 1.000 sec  
Pulse 80.8 degrees  
Acq. time 1.892 sec  
Width 8000.0 Hz  
200 repetitions  
OBSERVE H1, 499.8964838 MHz  
DATA PROCESSING  
FT size 32768  
Total time 9 min, 40 sec

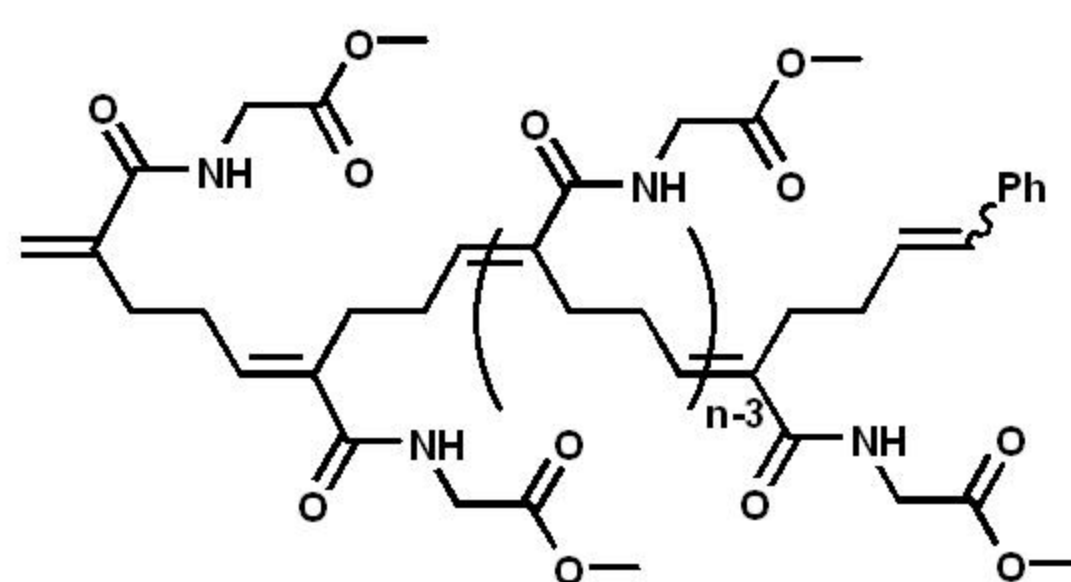**18-mer, n=18**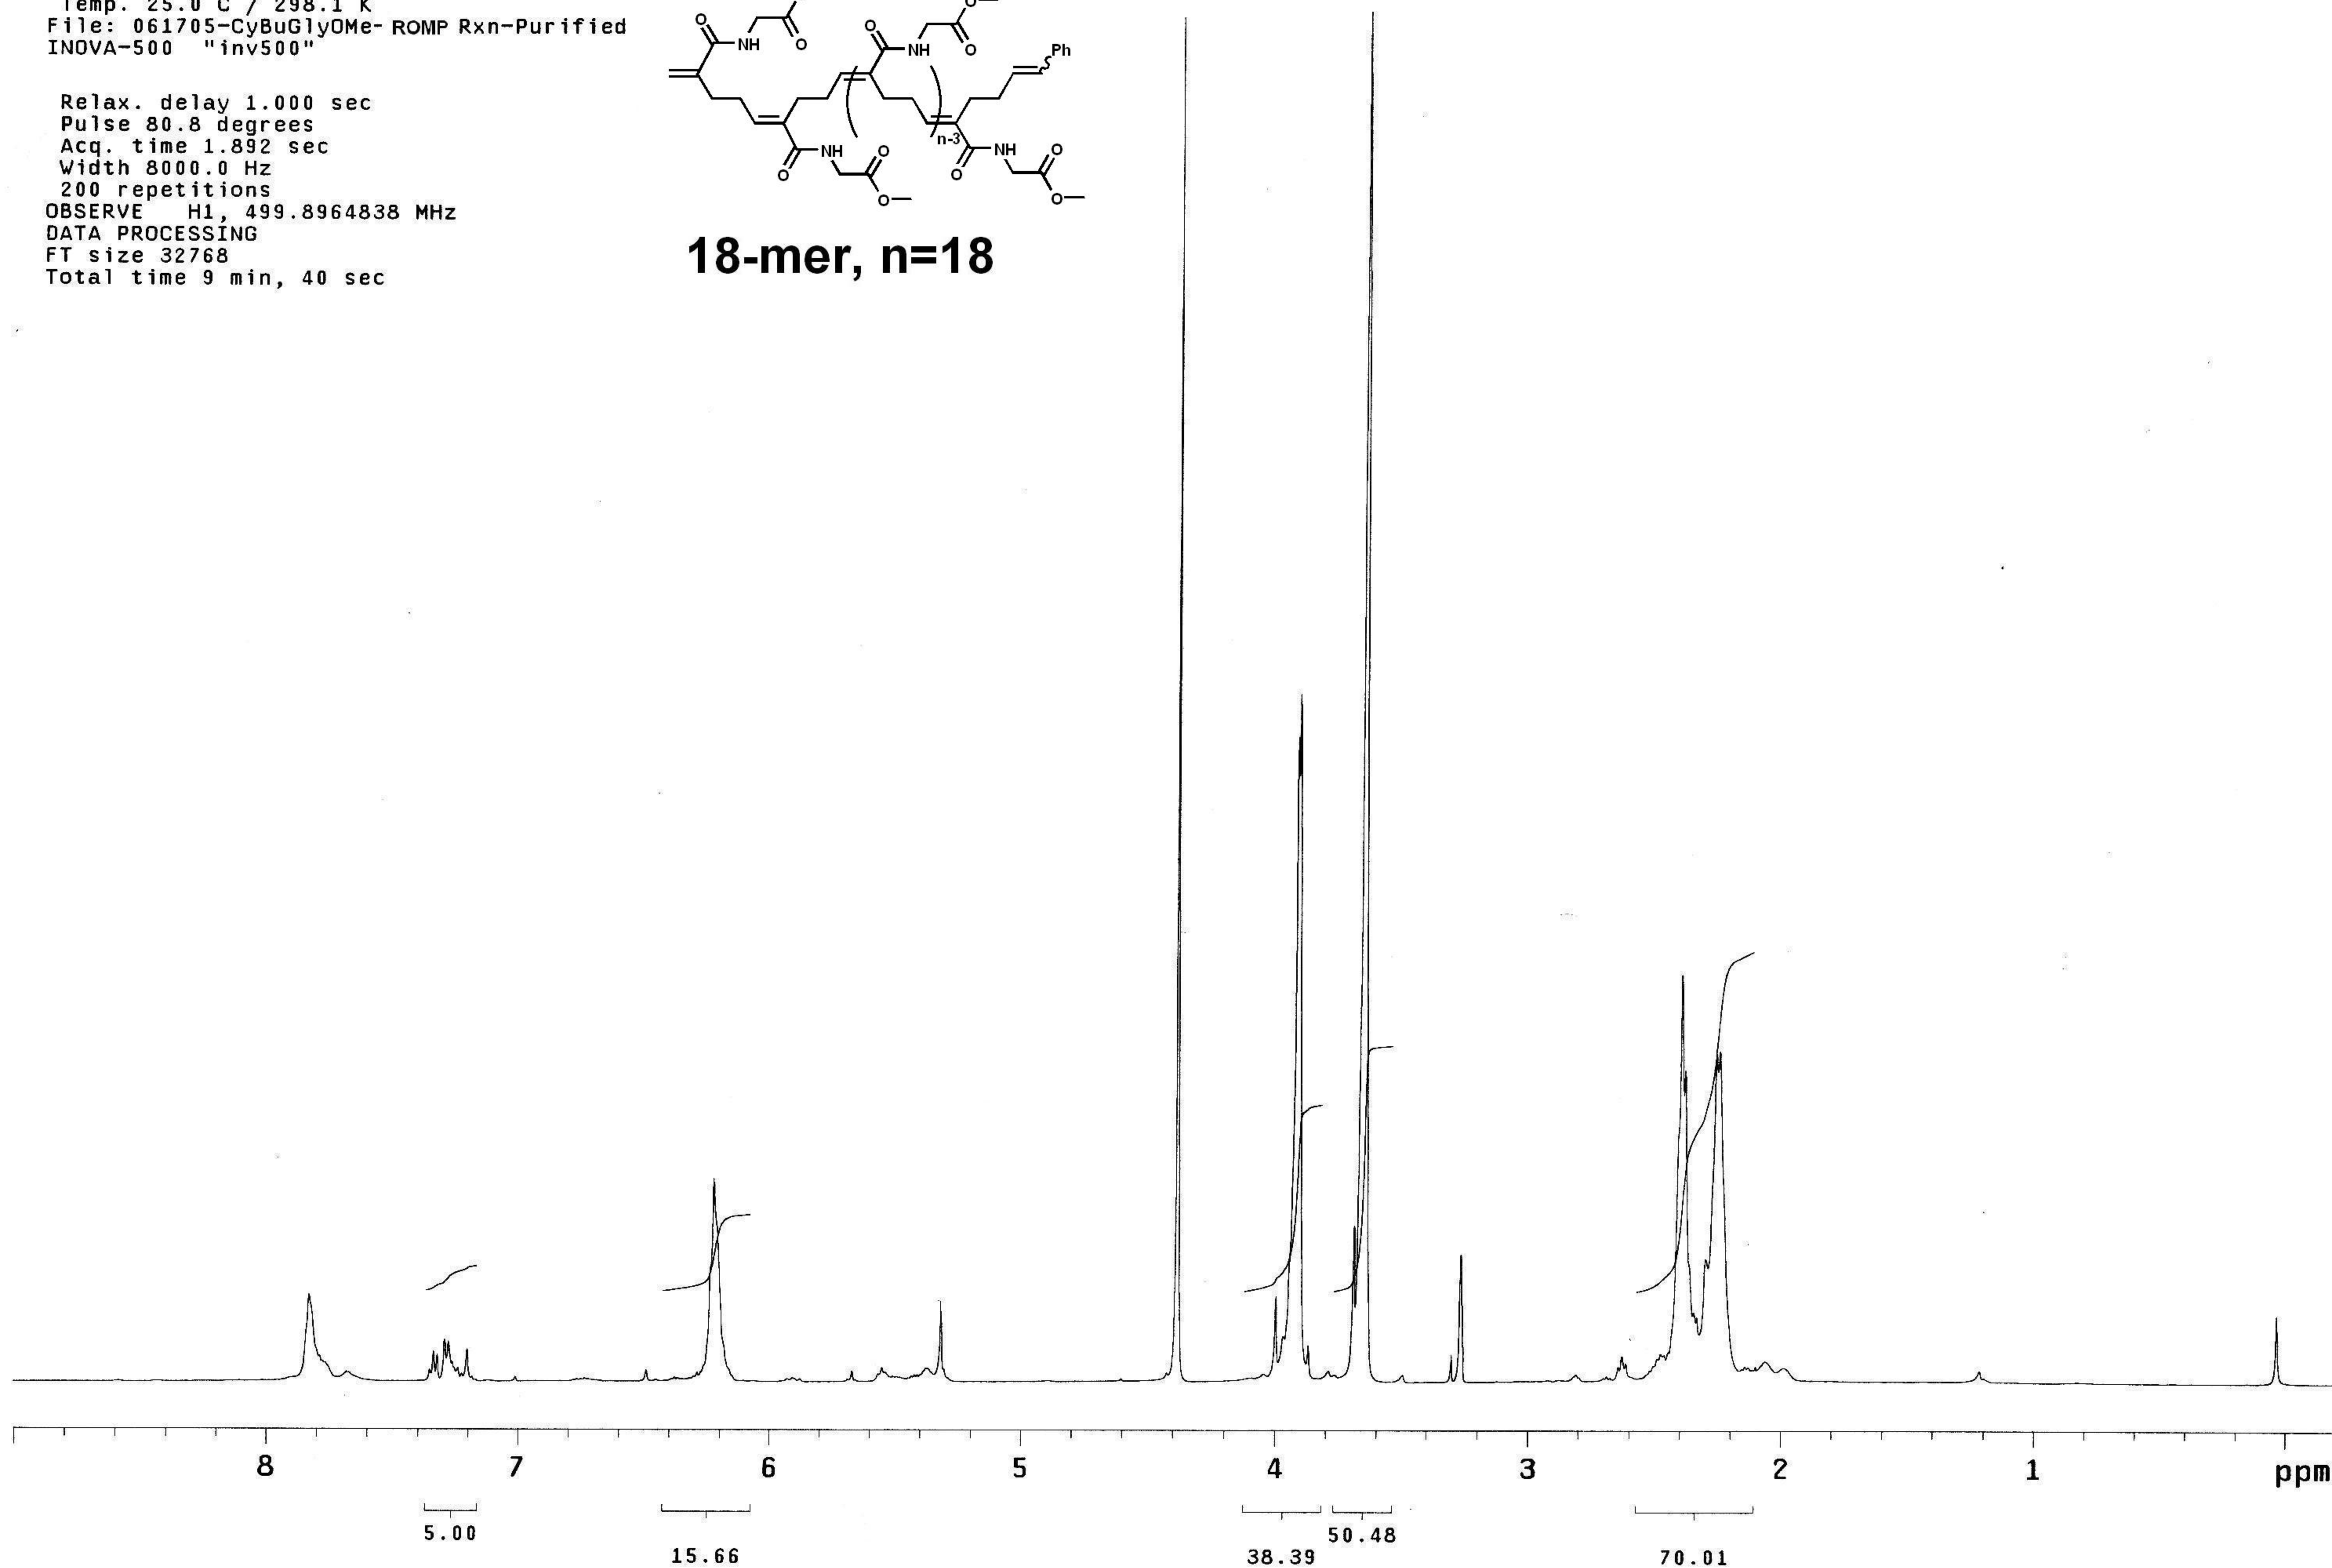



072905-Purified-1

Pulse Sequence: s2pu1

Solvent: CD2Cl2+CD3OD (2:1)  
Temp. 25.0 C / 298.1 K  
File: 072905-Purified-1  
INOVA-400 "inv400"

Relax. delay 1.000 sec  
Pulse 66.0 degrees  
Acq. time 3.744 sec  
Width 6000.6 Hz  
200 repetitions  
OBSERVE H1, 399.8395288 MHz  
DATA PROCESSING  
FT size 65536  
Total time 15 min, 50 sec

 **$^1\text{H-NMR}$** 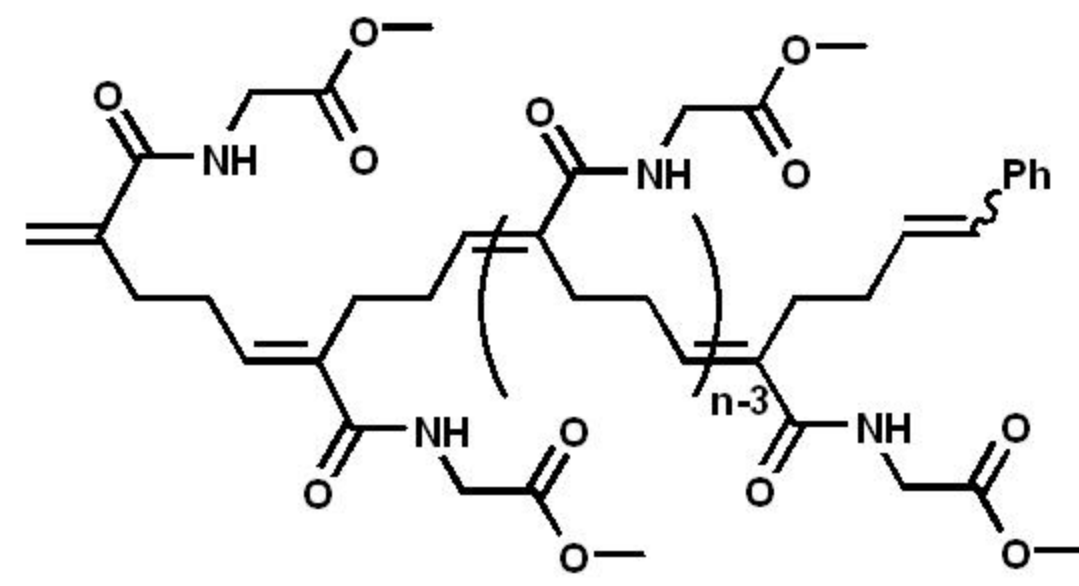**35-mer, n=35**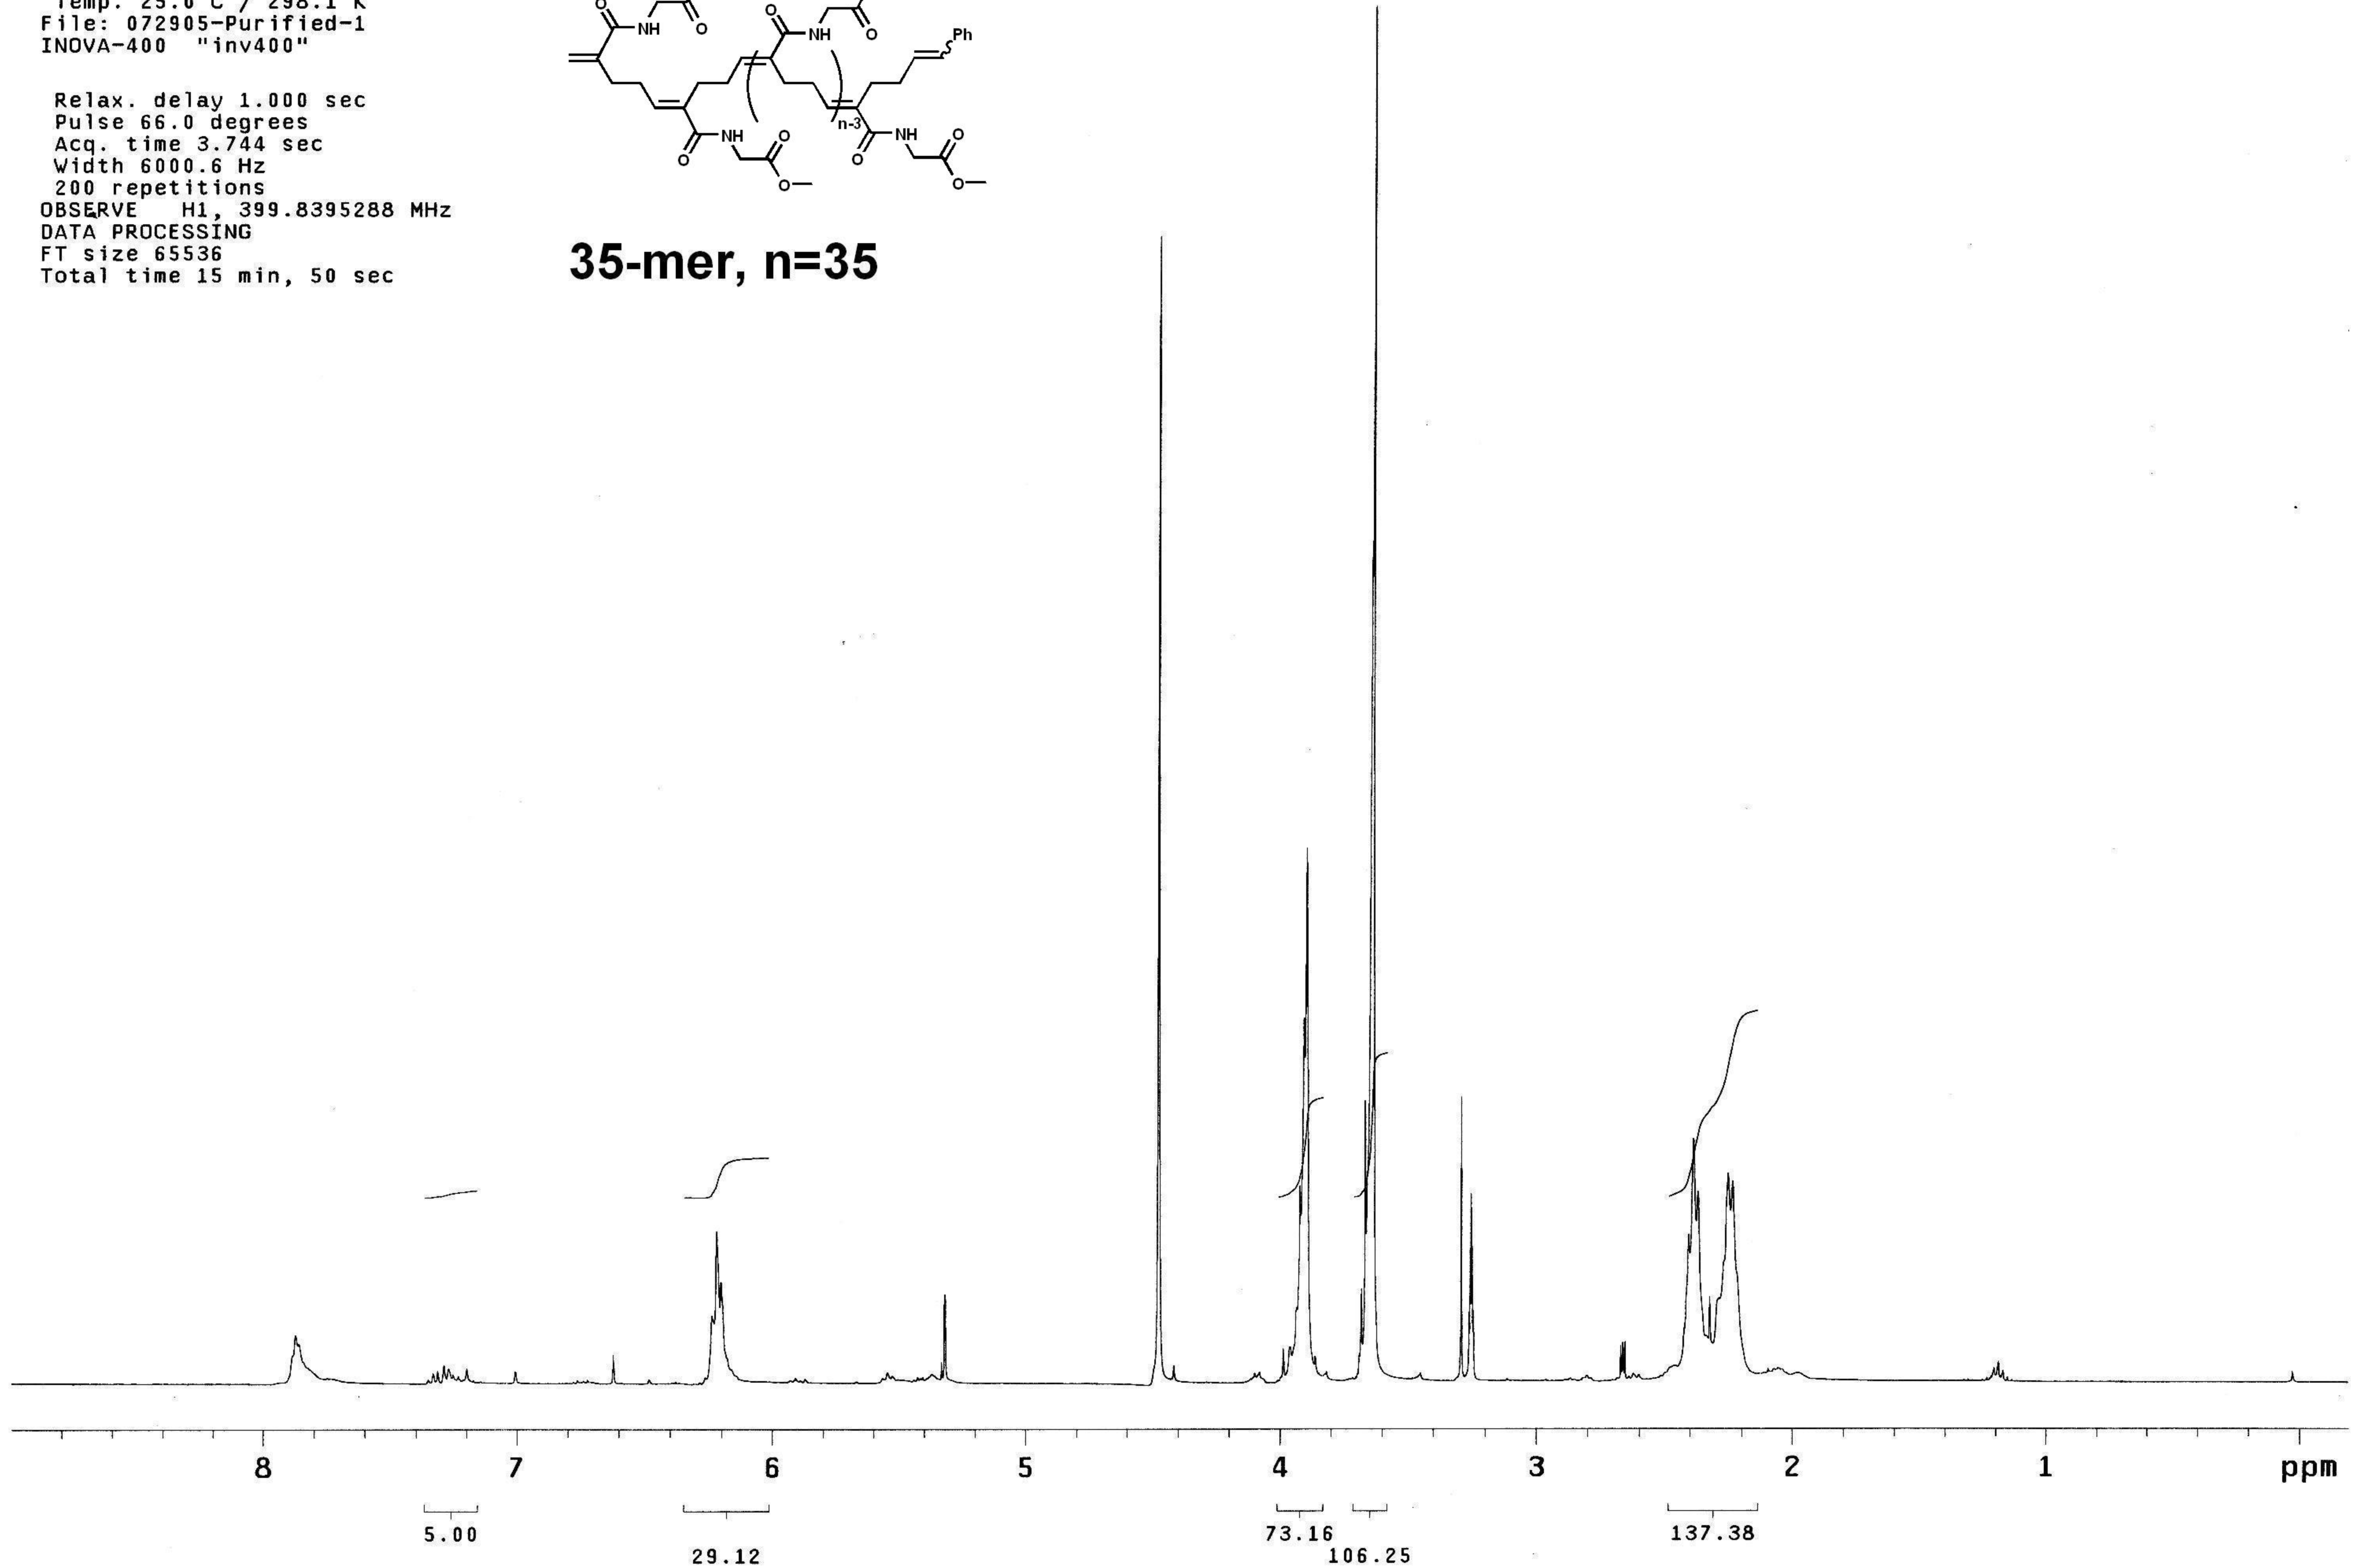



080505-Purified-Polymer

Pulse Sequence: s2pu1

Solvent: CD<sub>2</sub>Cl<sub>2</sub>+CD<sub>3</sub>OD (2:1)  
Temp. 25.0 C / 298.1 K  
INOVA-500 "inv500"Relax. delay 1.000 sec  
Pulse 80.8 degrees  
Acq. time 1.892 sec  
Width 8000.0 Hz  
200 repetitions  
OBSERVE H1, 499.8964799 MHz  
DATA PROCESSING  
FT size 32768  
Total time 9 min, 40 sec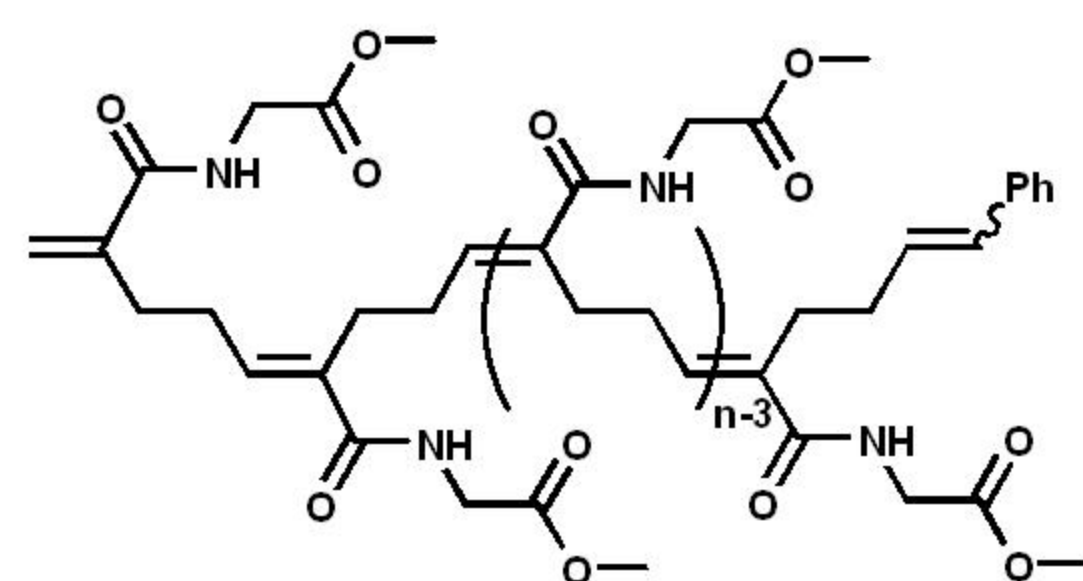**50-mer, n=50****1H-NMR**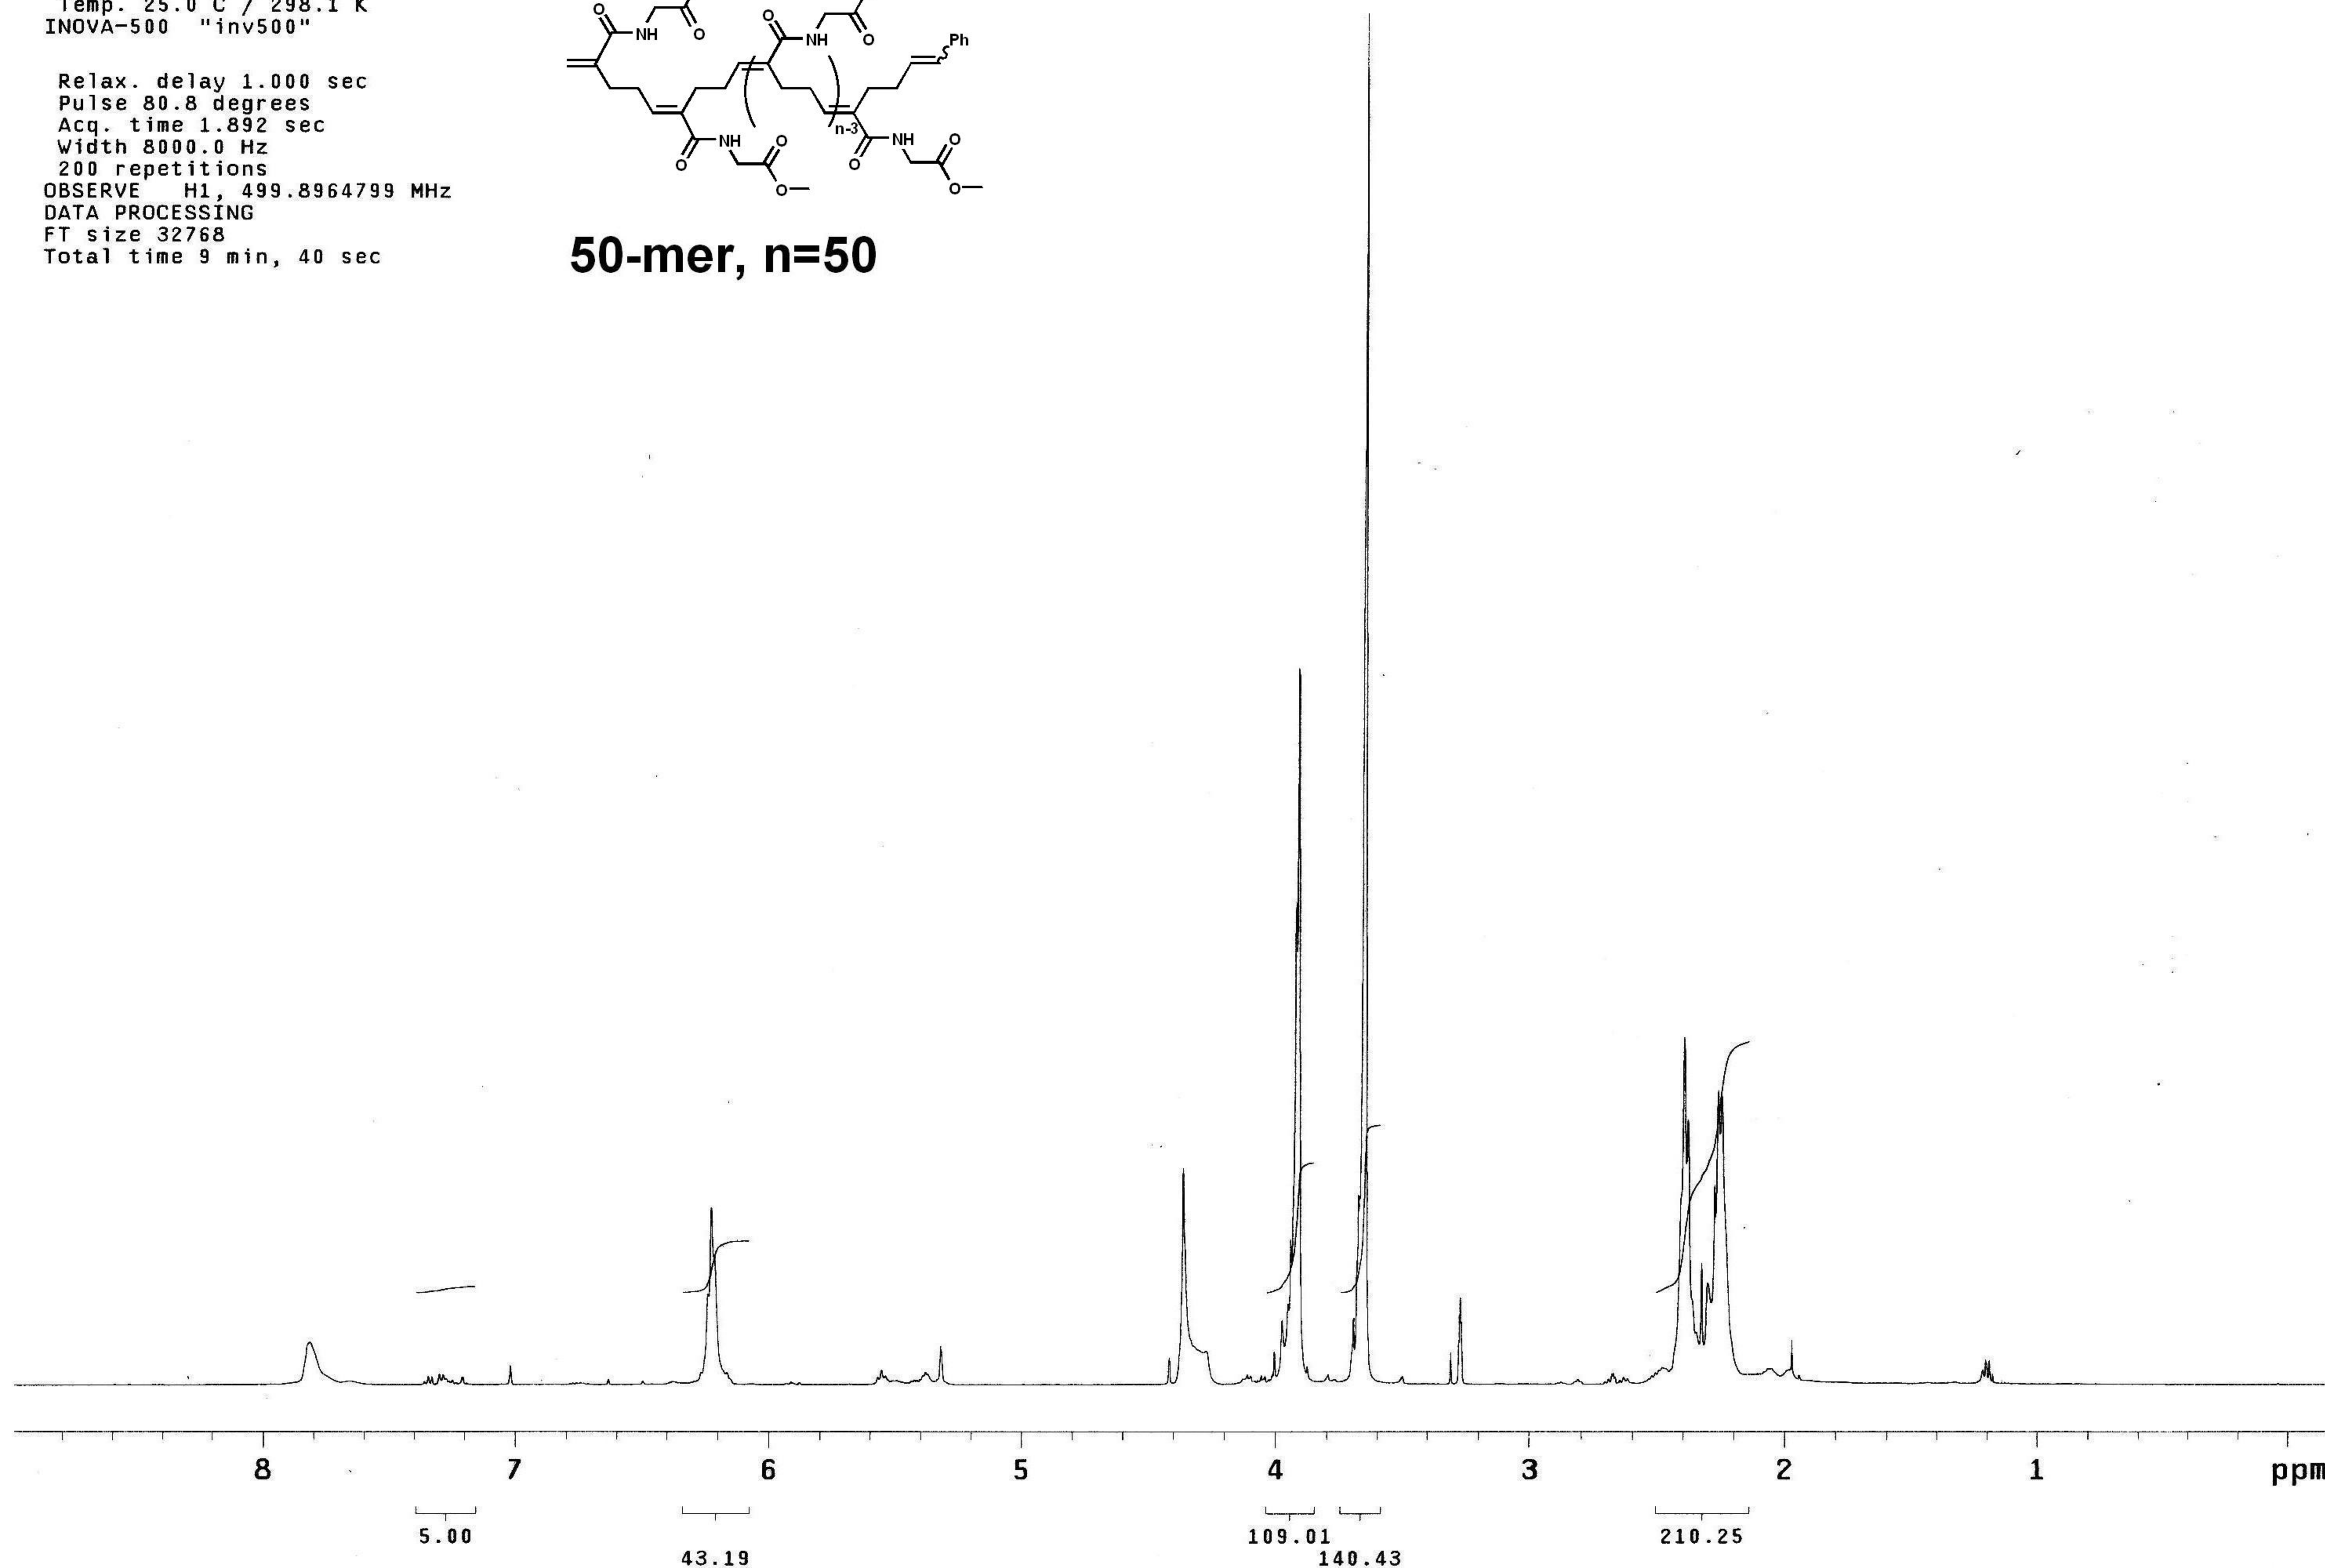

6-20-05 10mer gHMQC

Archive directory: /export/home/jclee/vnmrsys/data  
Sample directory: jclee\_20Jun2005

Pulse Sequence: gHMQC

Solvent: CD3OD+CDCl3(1:3)  
Temp. 25.0 C / 298.1 K  
File: gHMQC  
INOVA-400 "inv400"

Relax. delay 1.000 sec  
Acq. time 0.160 sec  
Width 3198.7 Hz  
2D Width 20105.6 Hz  
32 repetitions  
2 x 128 increments  
OBSERVE H1, 399.8395100 MHz  
DECOUPLE C13, 100.5487493 MHz  
Power 31 dB  
on during acquisition  
off during delay  
W40\_asw5133 modulated  
DATA PROCESSING  
Gauss apodization 0.074 sec  
F1 DATA PROCESSING  
Gauss apodization 0.012 sec  
FT size 1024 x 2048  
Total time 2 hr, 46 min, 27 sec

## 10-mer, g-HMQC

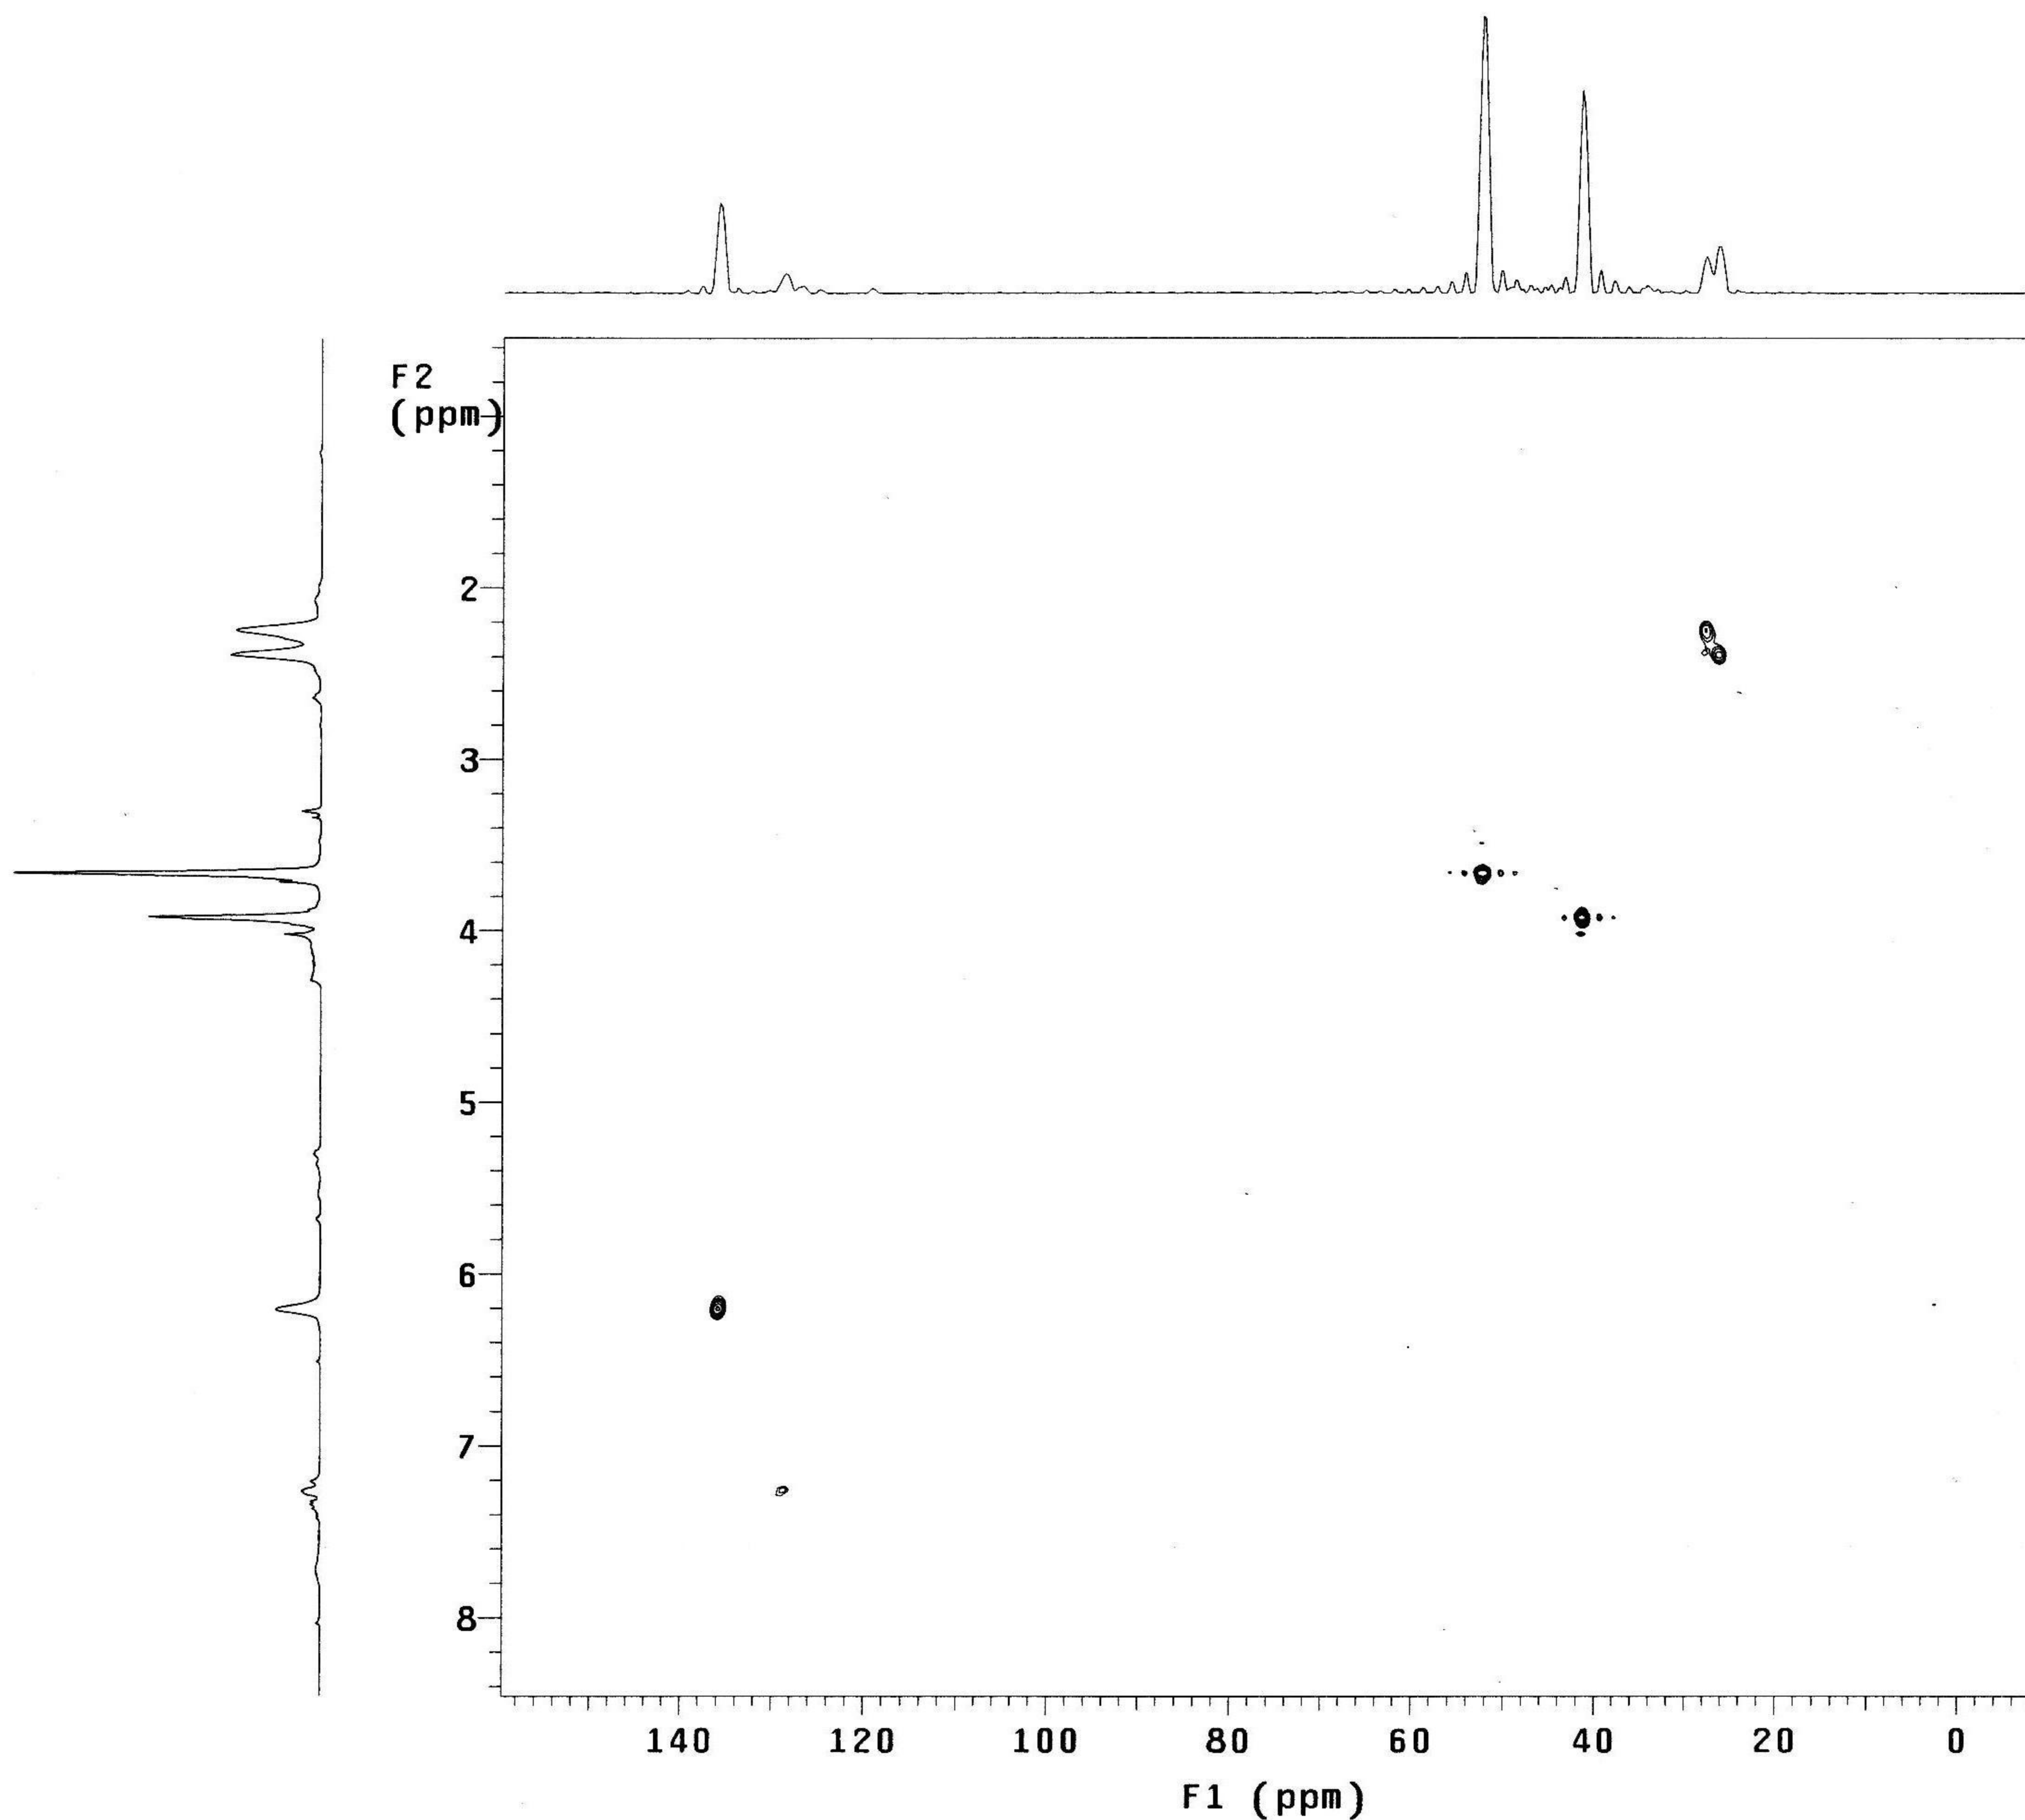

062005-CyBuGlyOMe-10mer-C13

# 13C-NMR

S27

Pulse Sequence: s2pu1

Solvent: CD2Cl2 + CD3OD (2:1)  
Temp. 25.0 C / 298.1 K  
INOVA-400 "inv400"

Relax. delay 1.000 sec  
Pulse 82.1 degrees  
Acq. time 1.199 sec  
Width 25000.0 Hz  
17144 repetitions  
OBSERVE C13, 100.5396359 MHz  
DECOUPLE H1, 399.8407019 MHz  
Power 45 dB  
continuously on  
WALTZ-16 modulated  
DATA PROCESSING  
Line broadening 1.0 Hz  
FT size 65536  
Total time 11 hr, 2 min, 27 sec

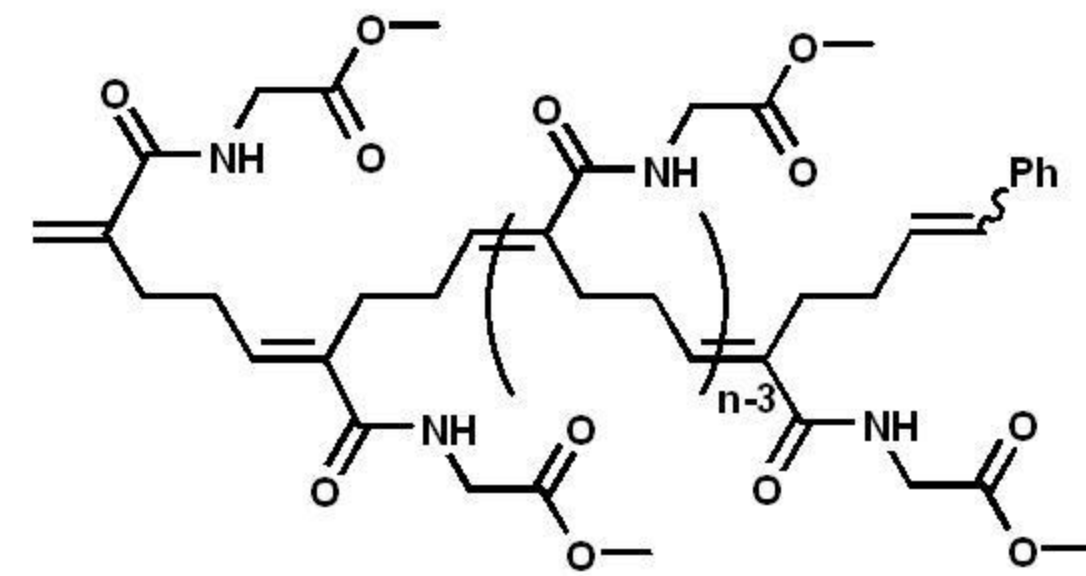

10-mer, n=10

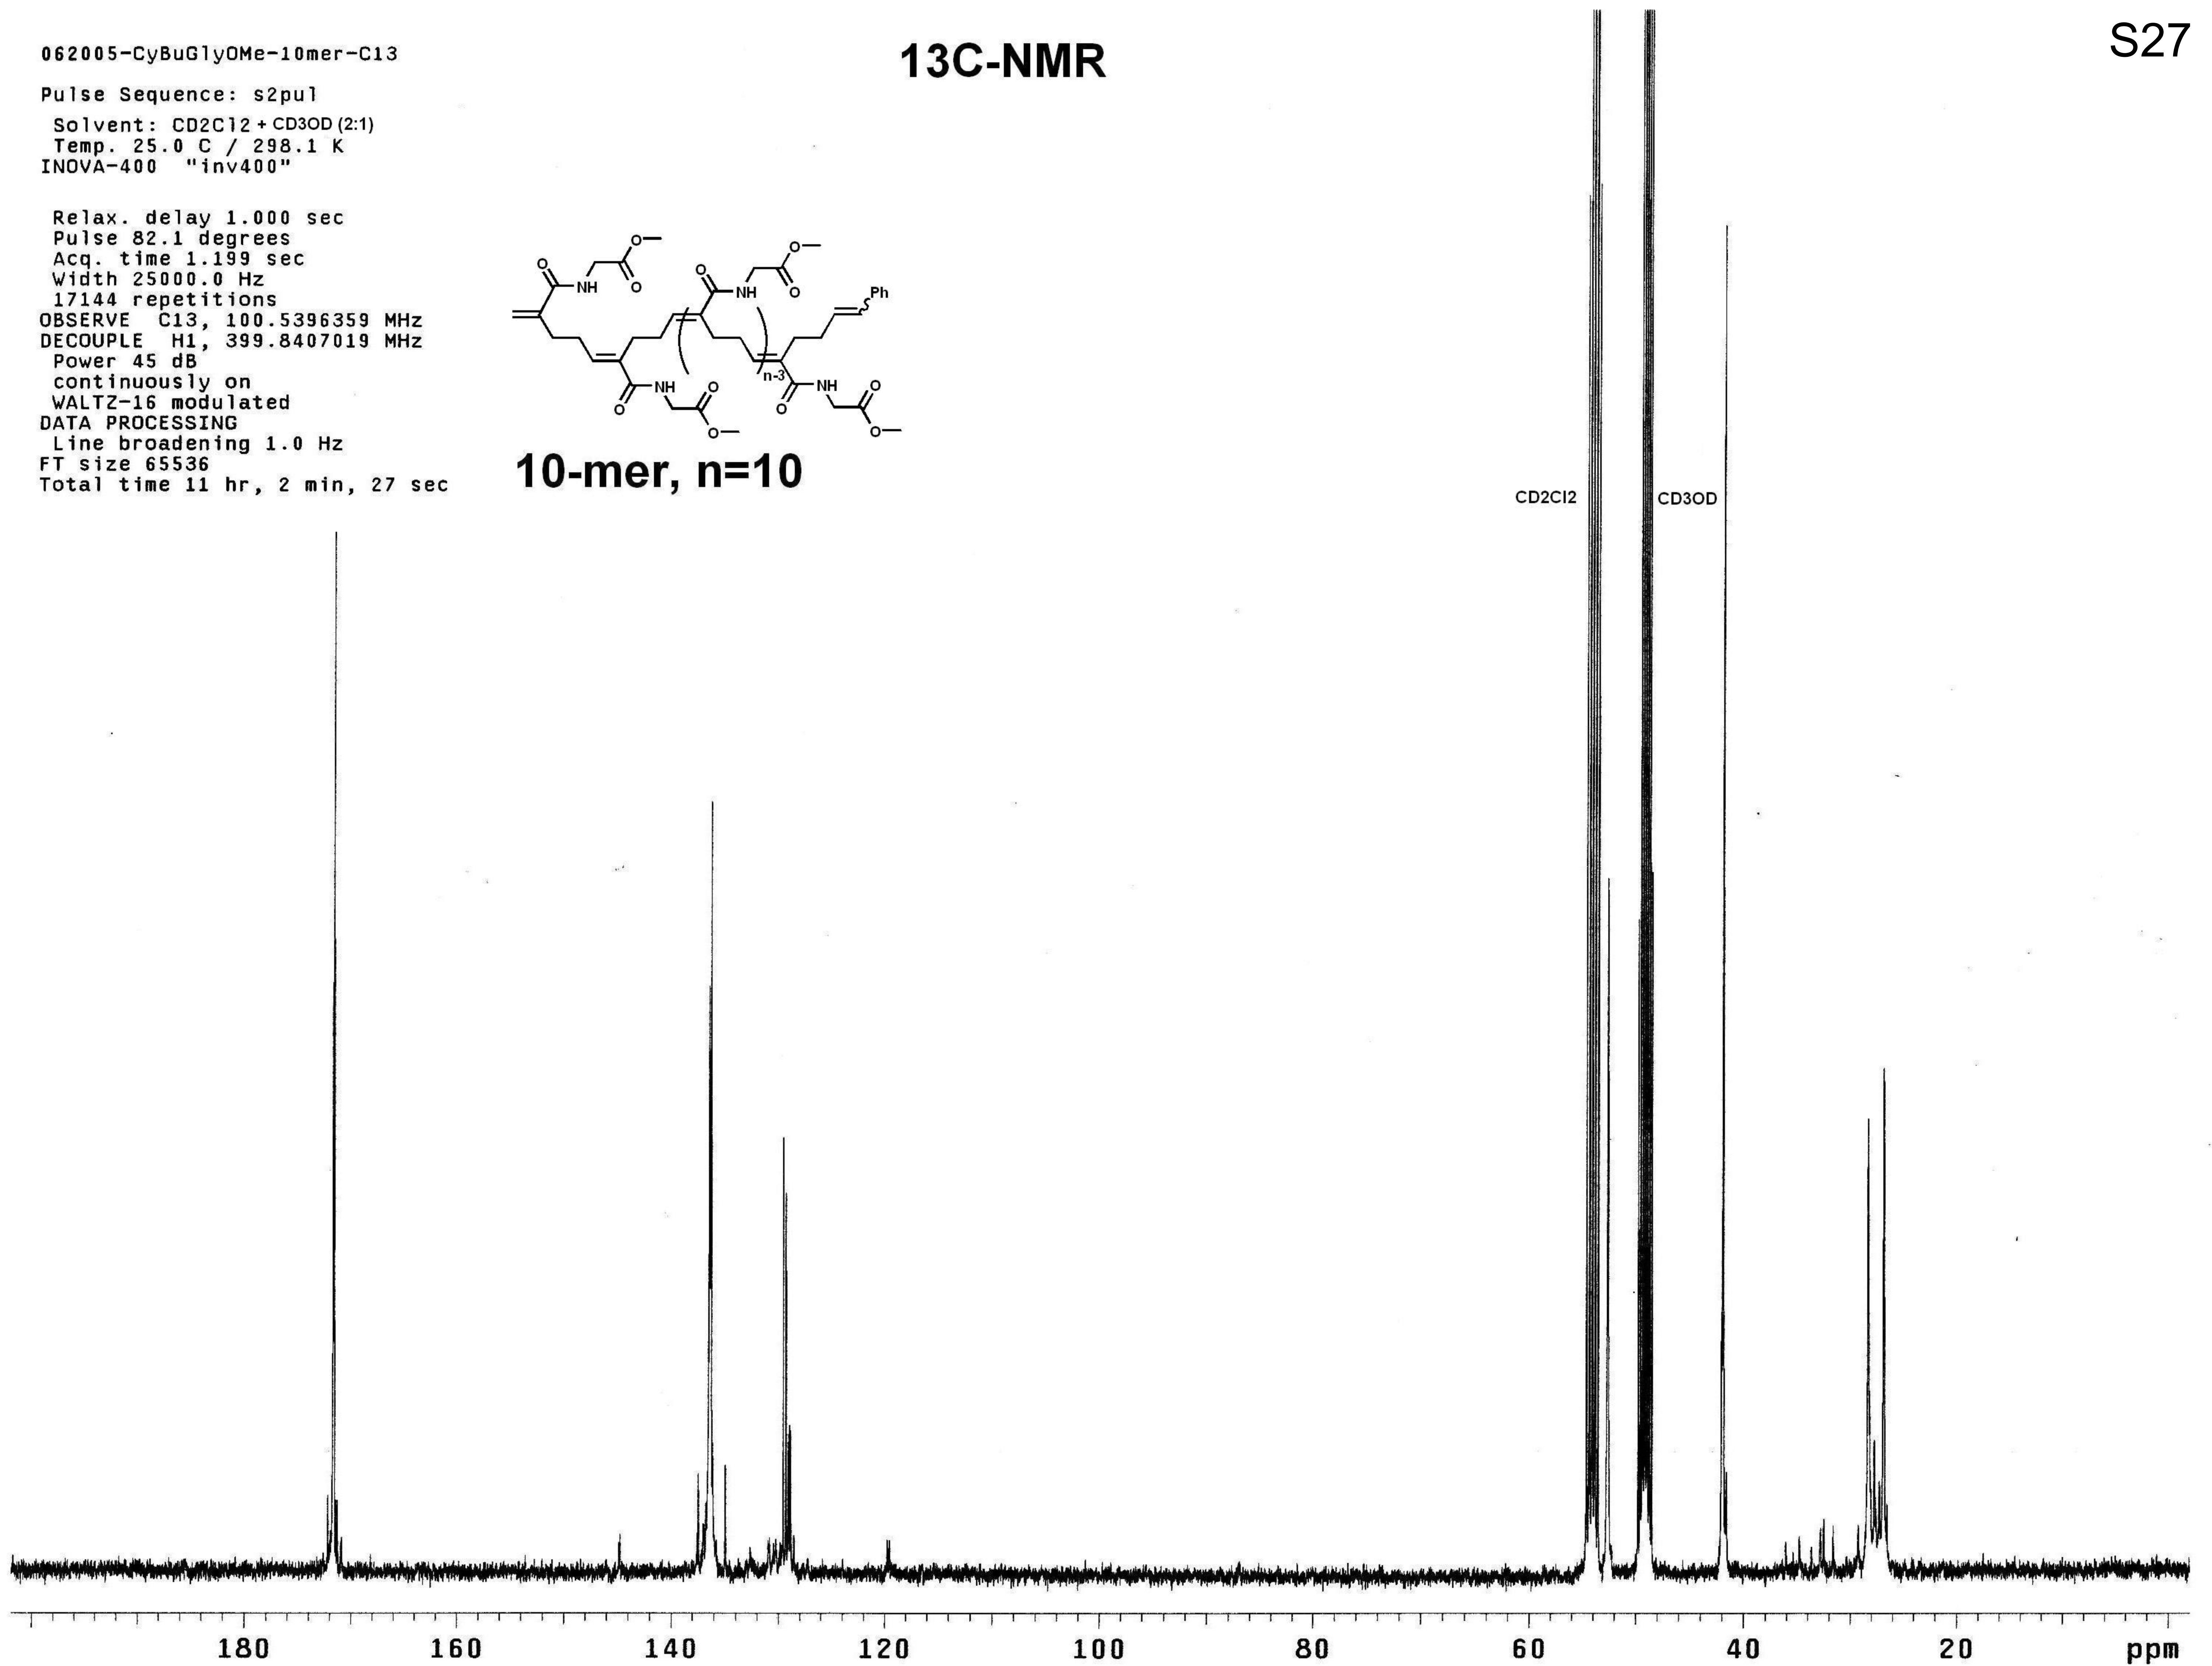



061705-purified-polymer-C13

Pulse Sequence: s2pu1

Solvent: CD<sub>2</sub>C1<sub>2</sub> + CD<sub>3</sub>OD (2:1)  
Temp. 25.0 C / 298.1 K  
INOVA-400 "inv400"Relax. delay 1.000 sec  
Pulse 82.1 degrees  
Acq. time 1.199 sec  
Width 25000.0 Hz  
17000 repetitions  
OBSERVE C13, 100.5396389 MHz  
DECOUPLE H1, 399.8407019 MHz  
Power 47 dB  
continuously on  
WALTZ-16 modulated  
DATA PROCESSING  
Line broadening 1.0 Hz  
FT size 65536  
Total time 10 hr, 25 min, 39 sec**13C-NMR**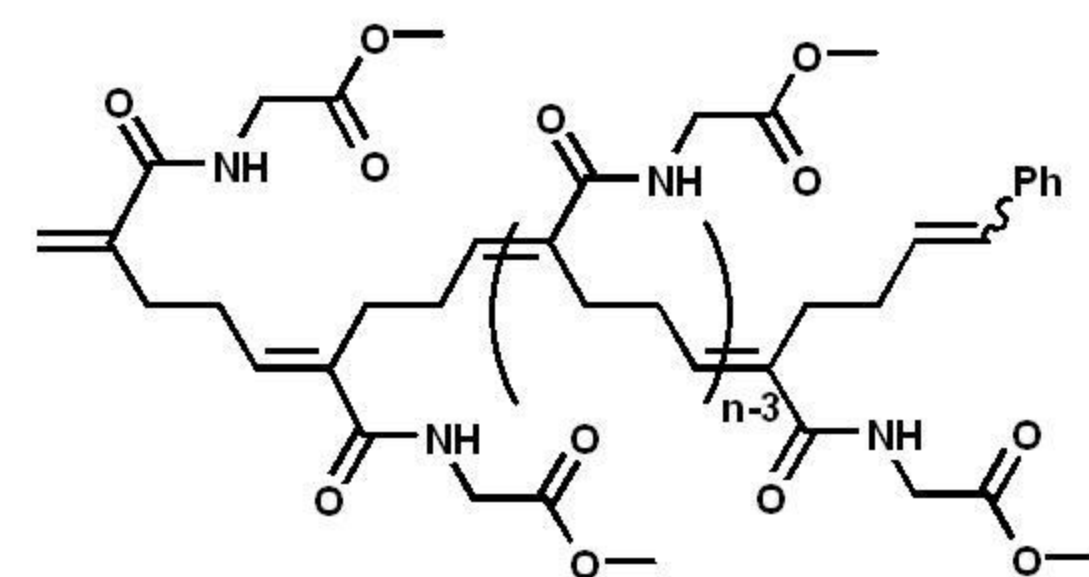**18-mer, n=18**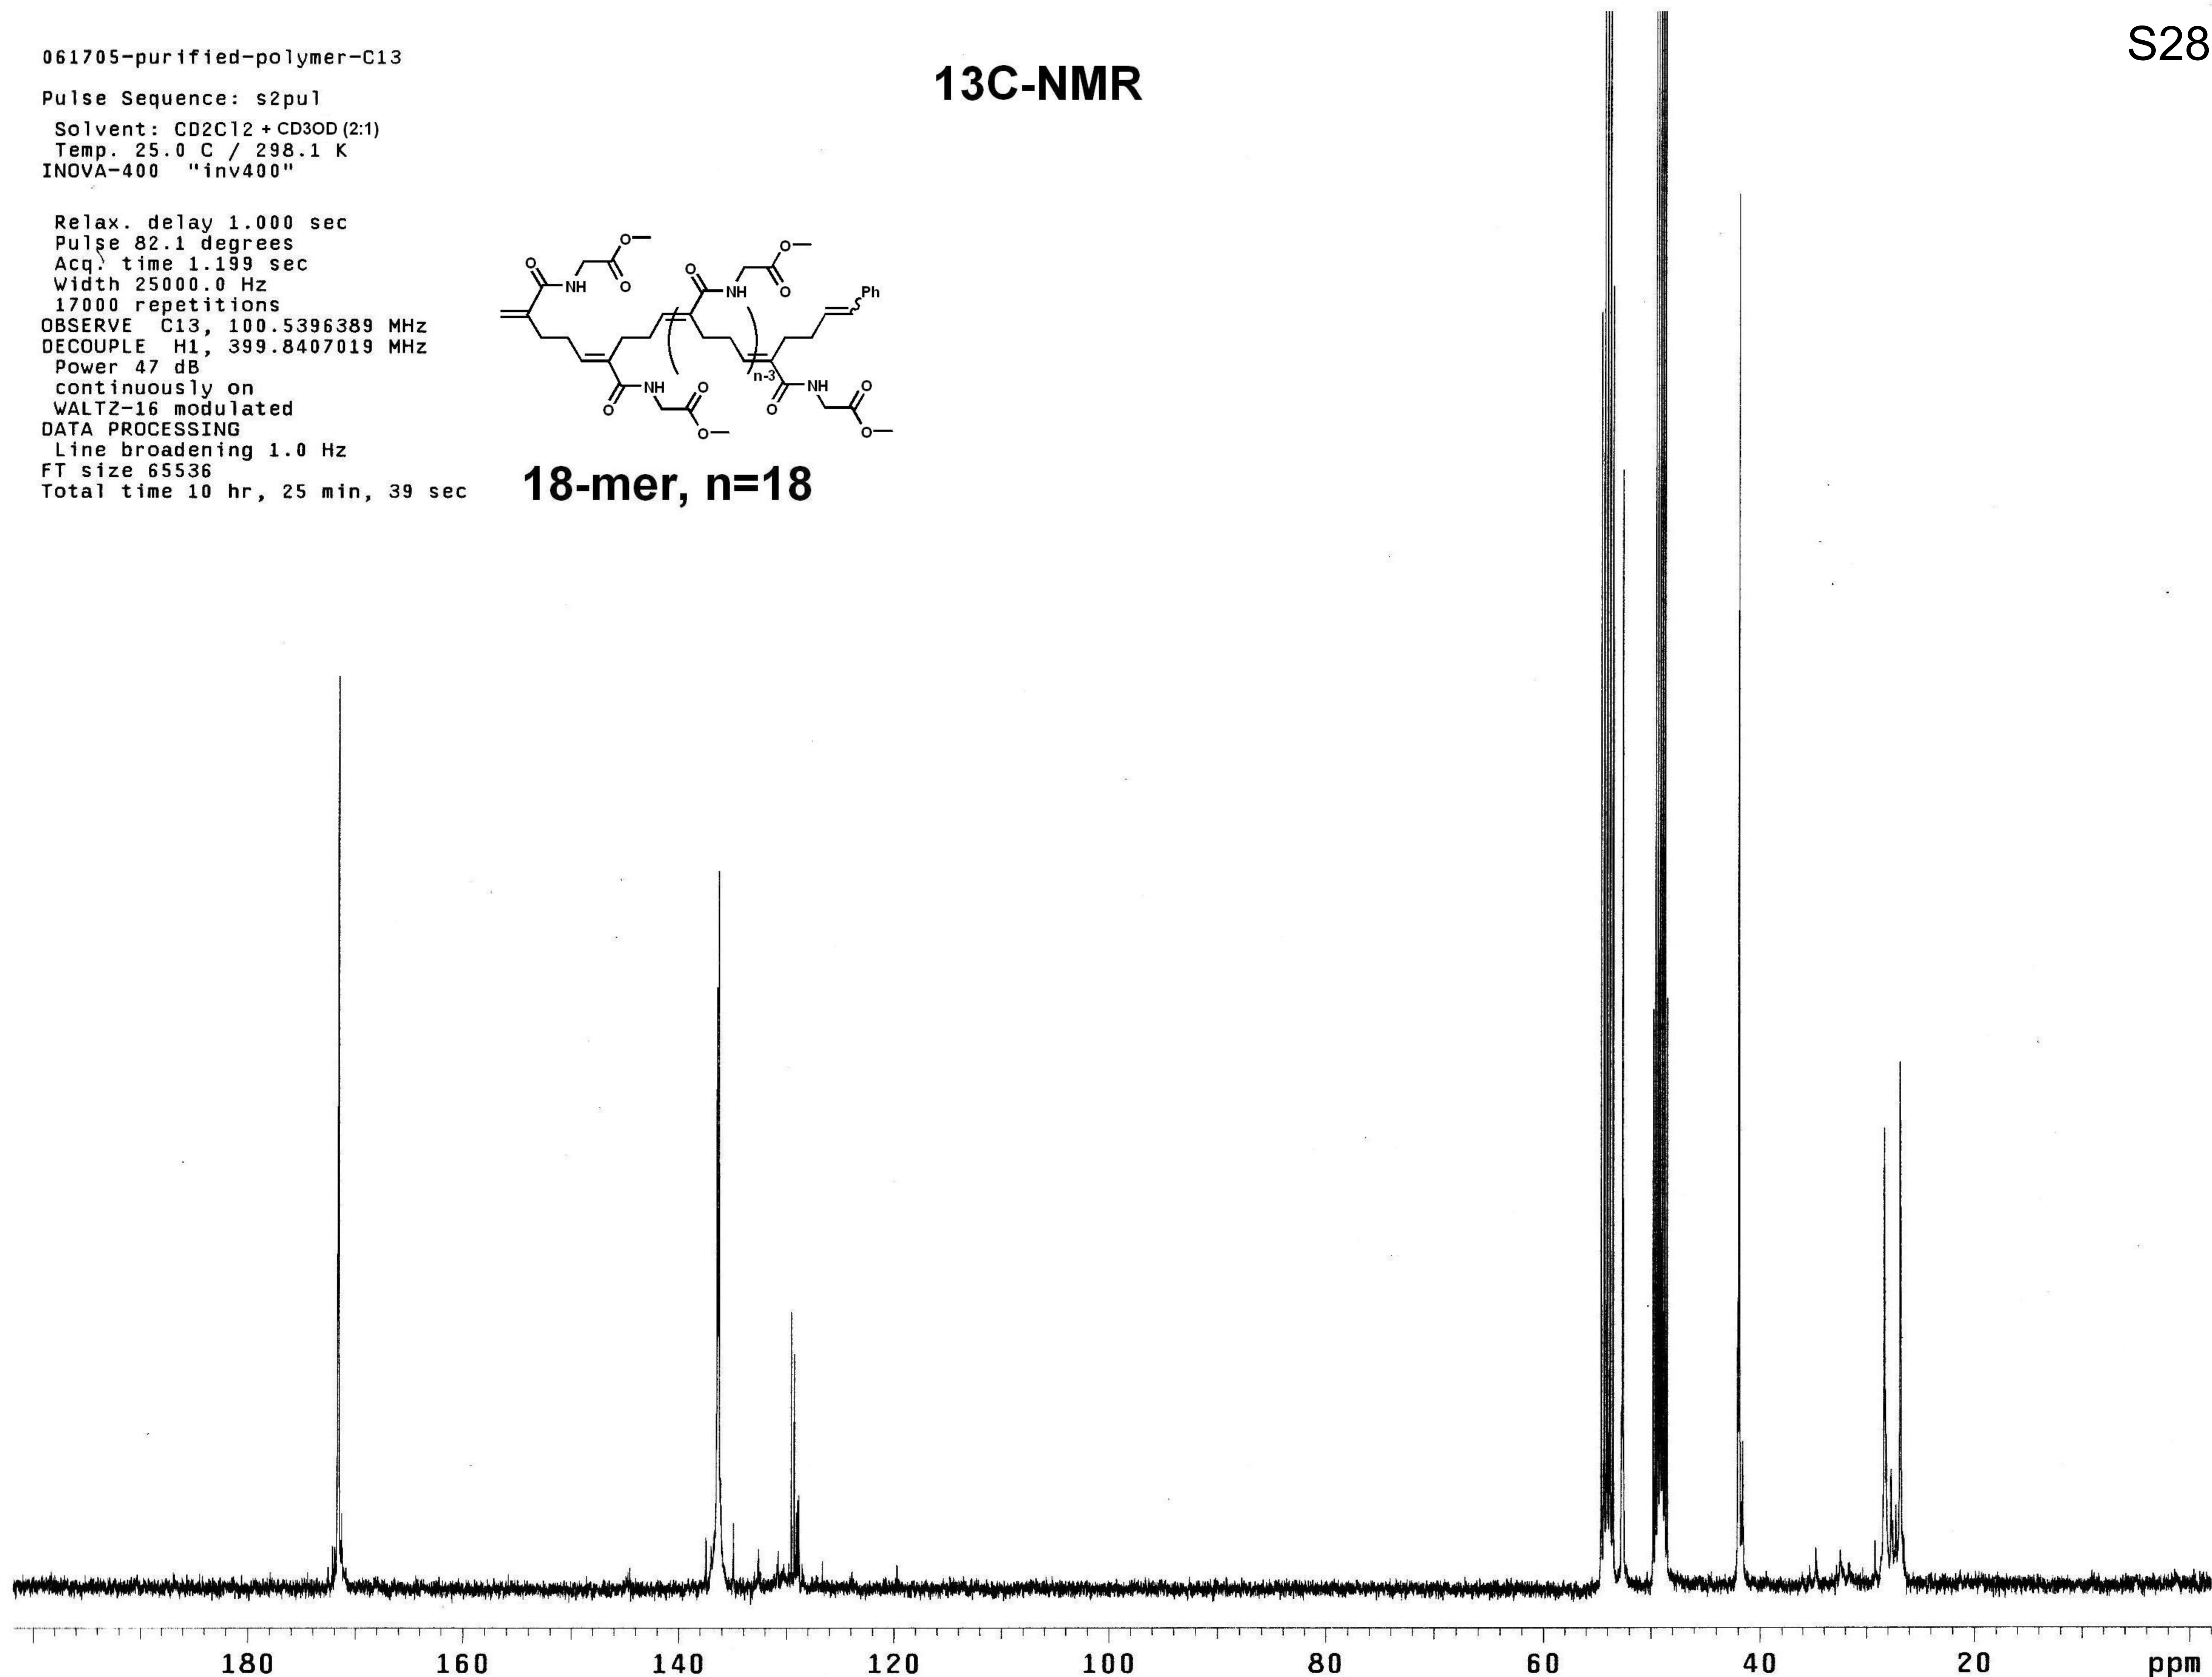

061705-purified-polymer-C13-APT

**18-mer, <sup>13</sup>C-APT spectrum**

Pulse Sequence: apt

Solvent: CD<sub>2</sub>Cl<sub>2</sub> + CD<sub>3</sub>OD (2:1)  
Temp. 25.0 C / 298.1 K  
INOVA-400 "inv400"Relax. delay 1.000 sec  
1st pulse 180.0 degrees  
2nd pulse 82.1 degrees  
Acq. time 1.199 sec  
Width 25000.0 Hz  
17000 repetitions  
OBSERVE C13, 100.5396366 MHz  
DECOUPLE H1, 399.8399342 MHz  
Power 47 dB  
on during acquisition  
WALTZ-16 modulated  
DATA PROCESSING  
Line broadening 1.0 Hz  
FT size 65536  
Total time 10 hr, 30 min, 41 sec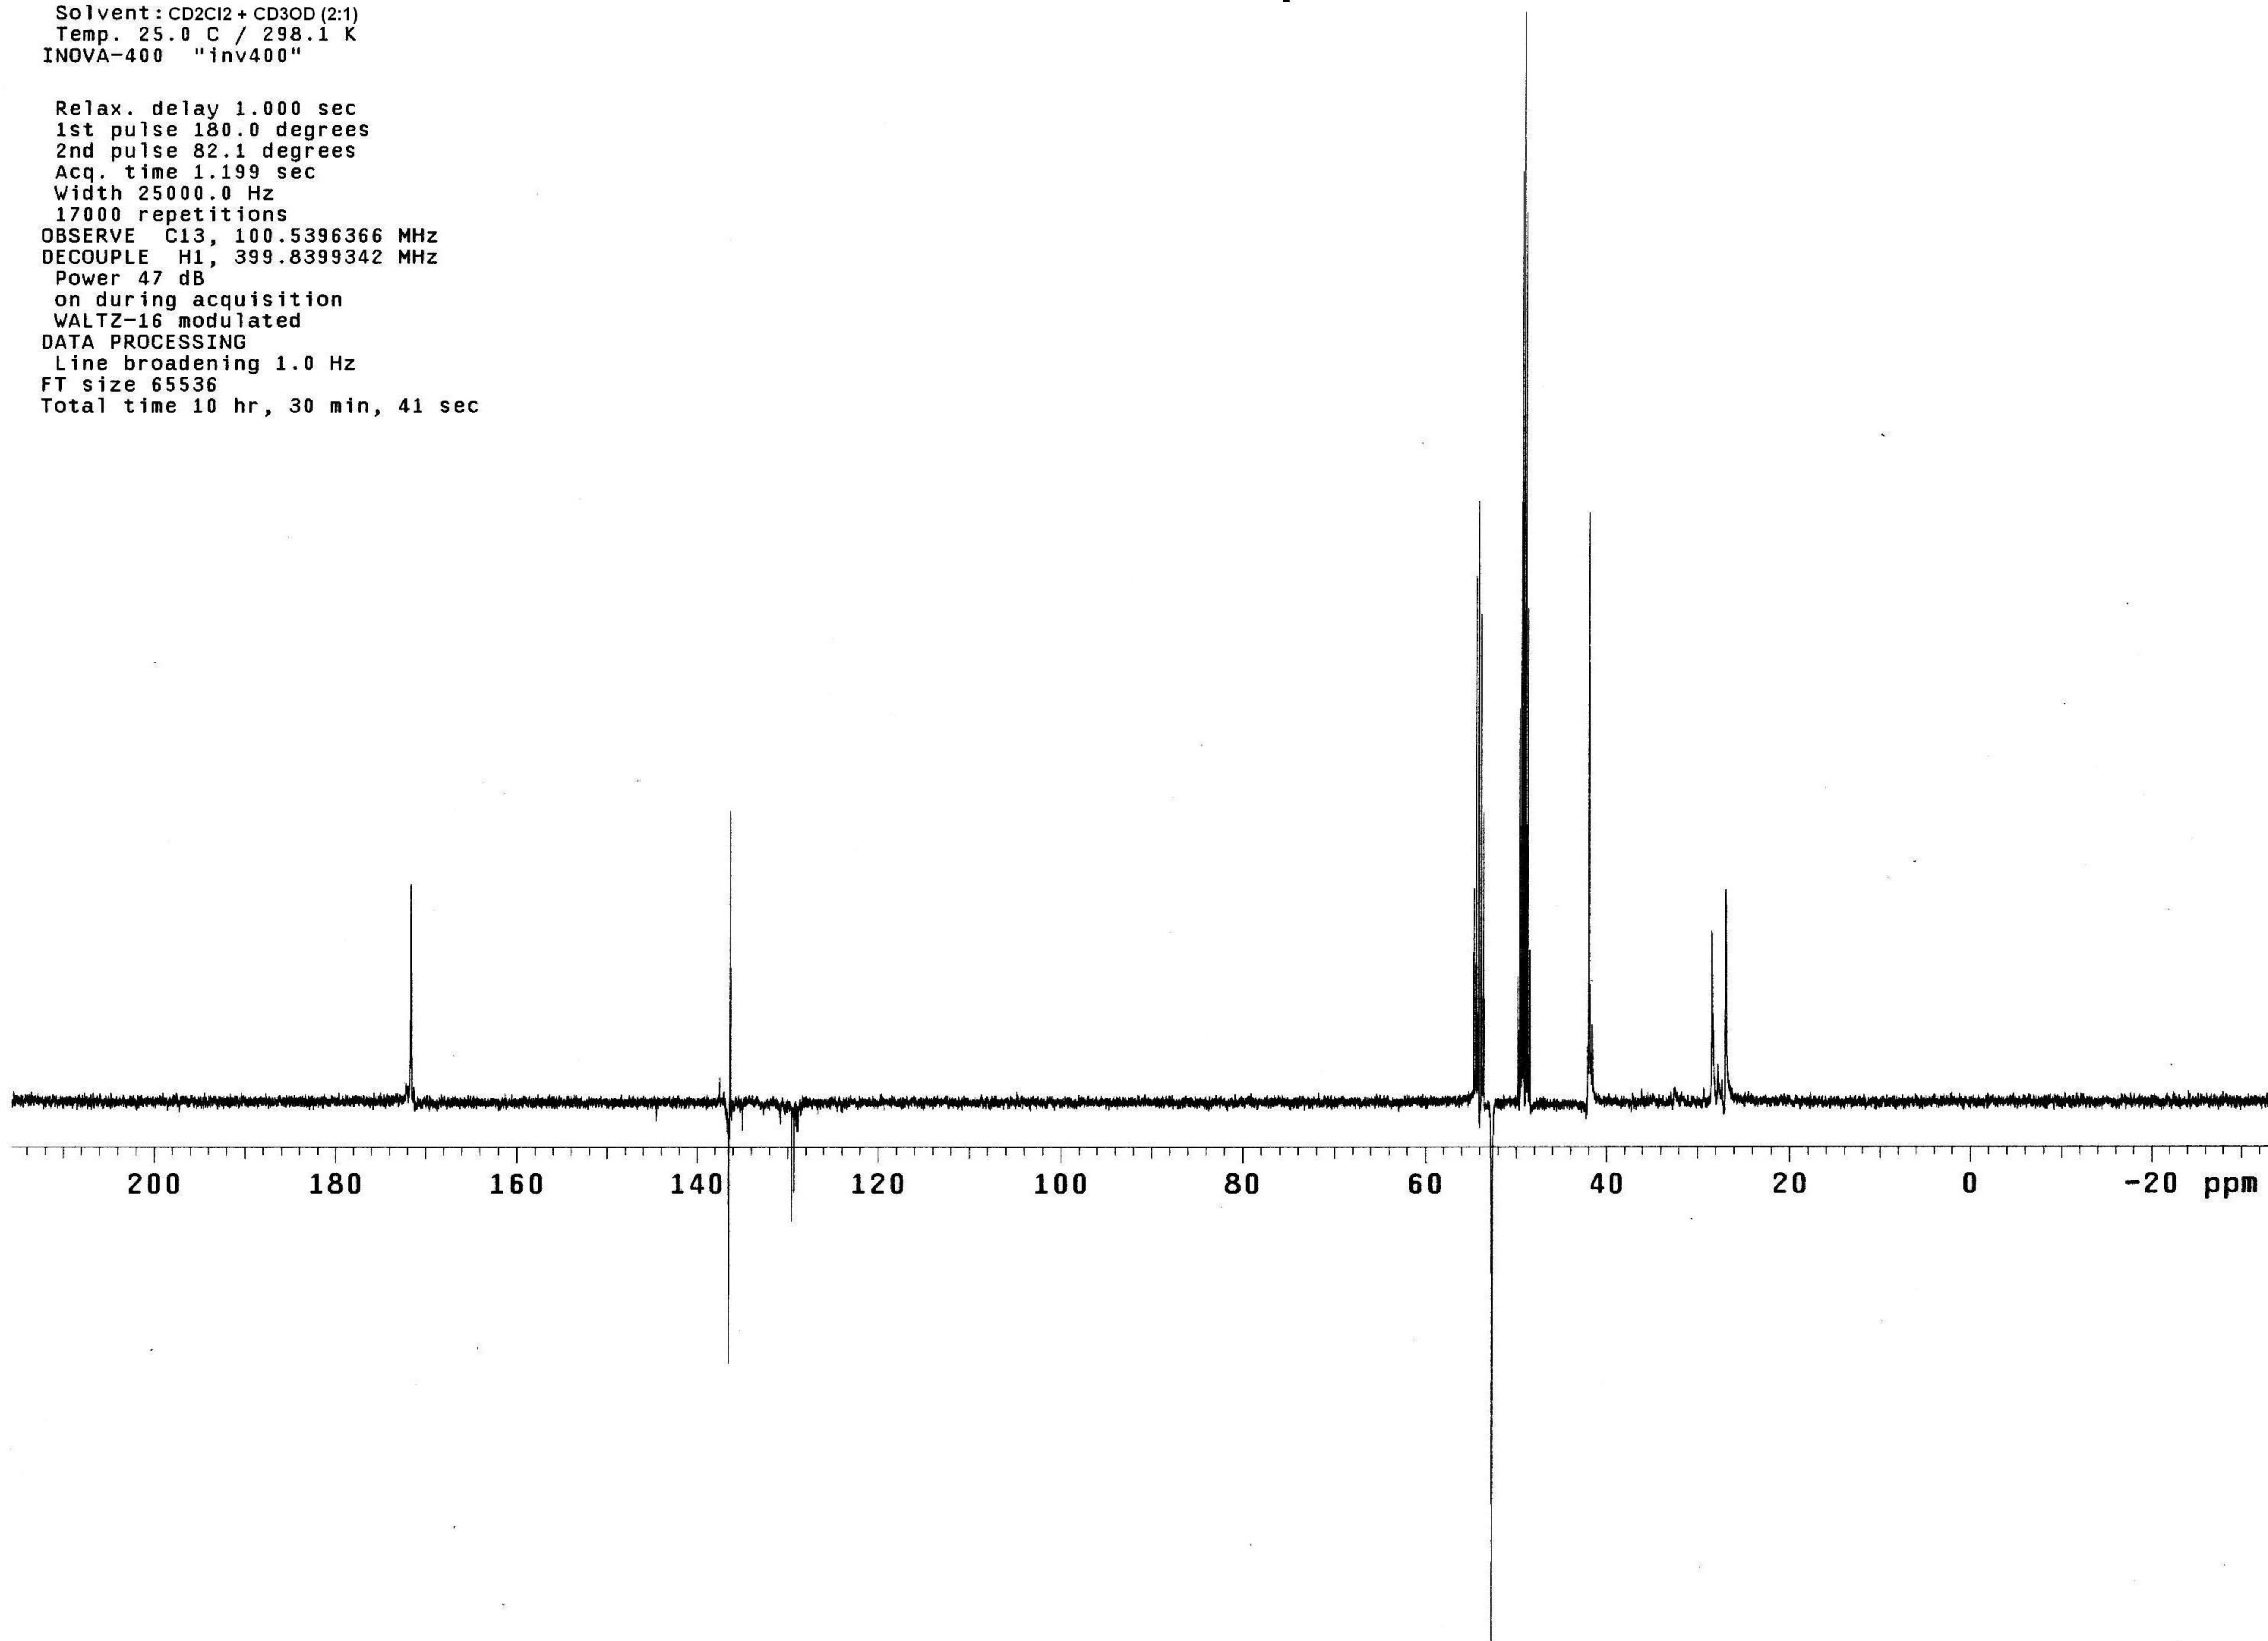

## 13C-NMR

072605-Purified-Polymer-C13

Pulse Sequence: s2pu1

Solvent: CD2Cl2+CD3OD (2:1)  
Temp. 25.0 C / 298.1 K  
INOVA-400 "inv400"Relax. delay 1.000 sec  
Pulse 82.1 degrees  
Acq. time 1.199 sec  
Width 25000.0 Hz  
16680 repetitions  
OBSERVE C13, 100.5396420 MHz  
DECOUPLE H1, 399.8407019 MHz  
Power 47 dB  
continuously on  
WALTZ-16 modulated  
DATA PROCESSING  
Line broadening 1.0 Hz  
FT size 65536  
Total time 10 hr, 25 min, 39 sec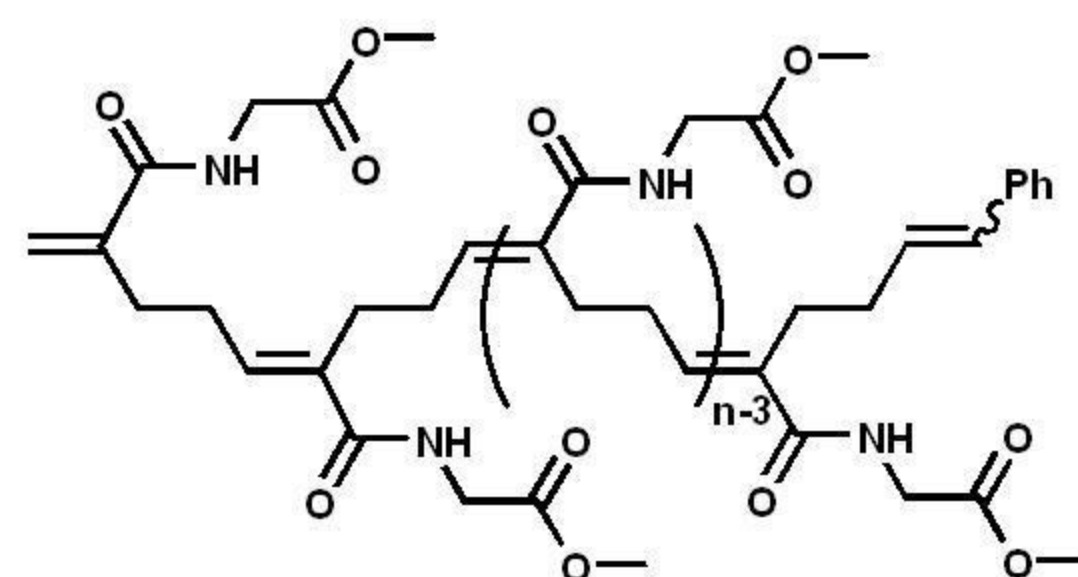

35-mer, n=35

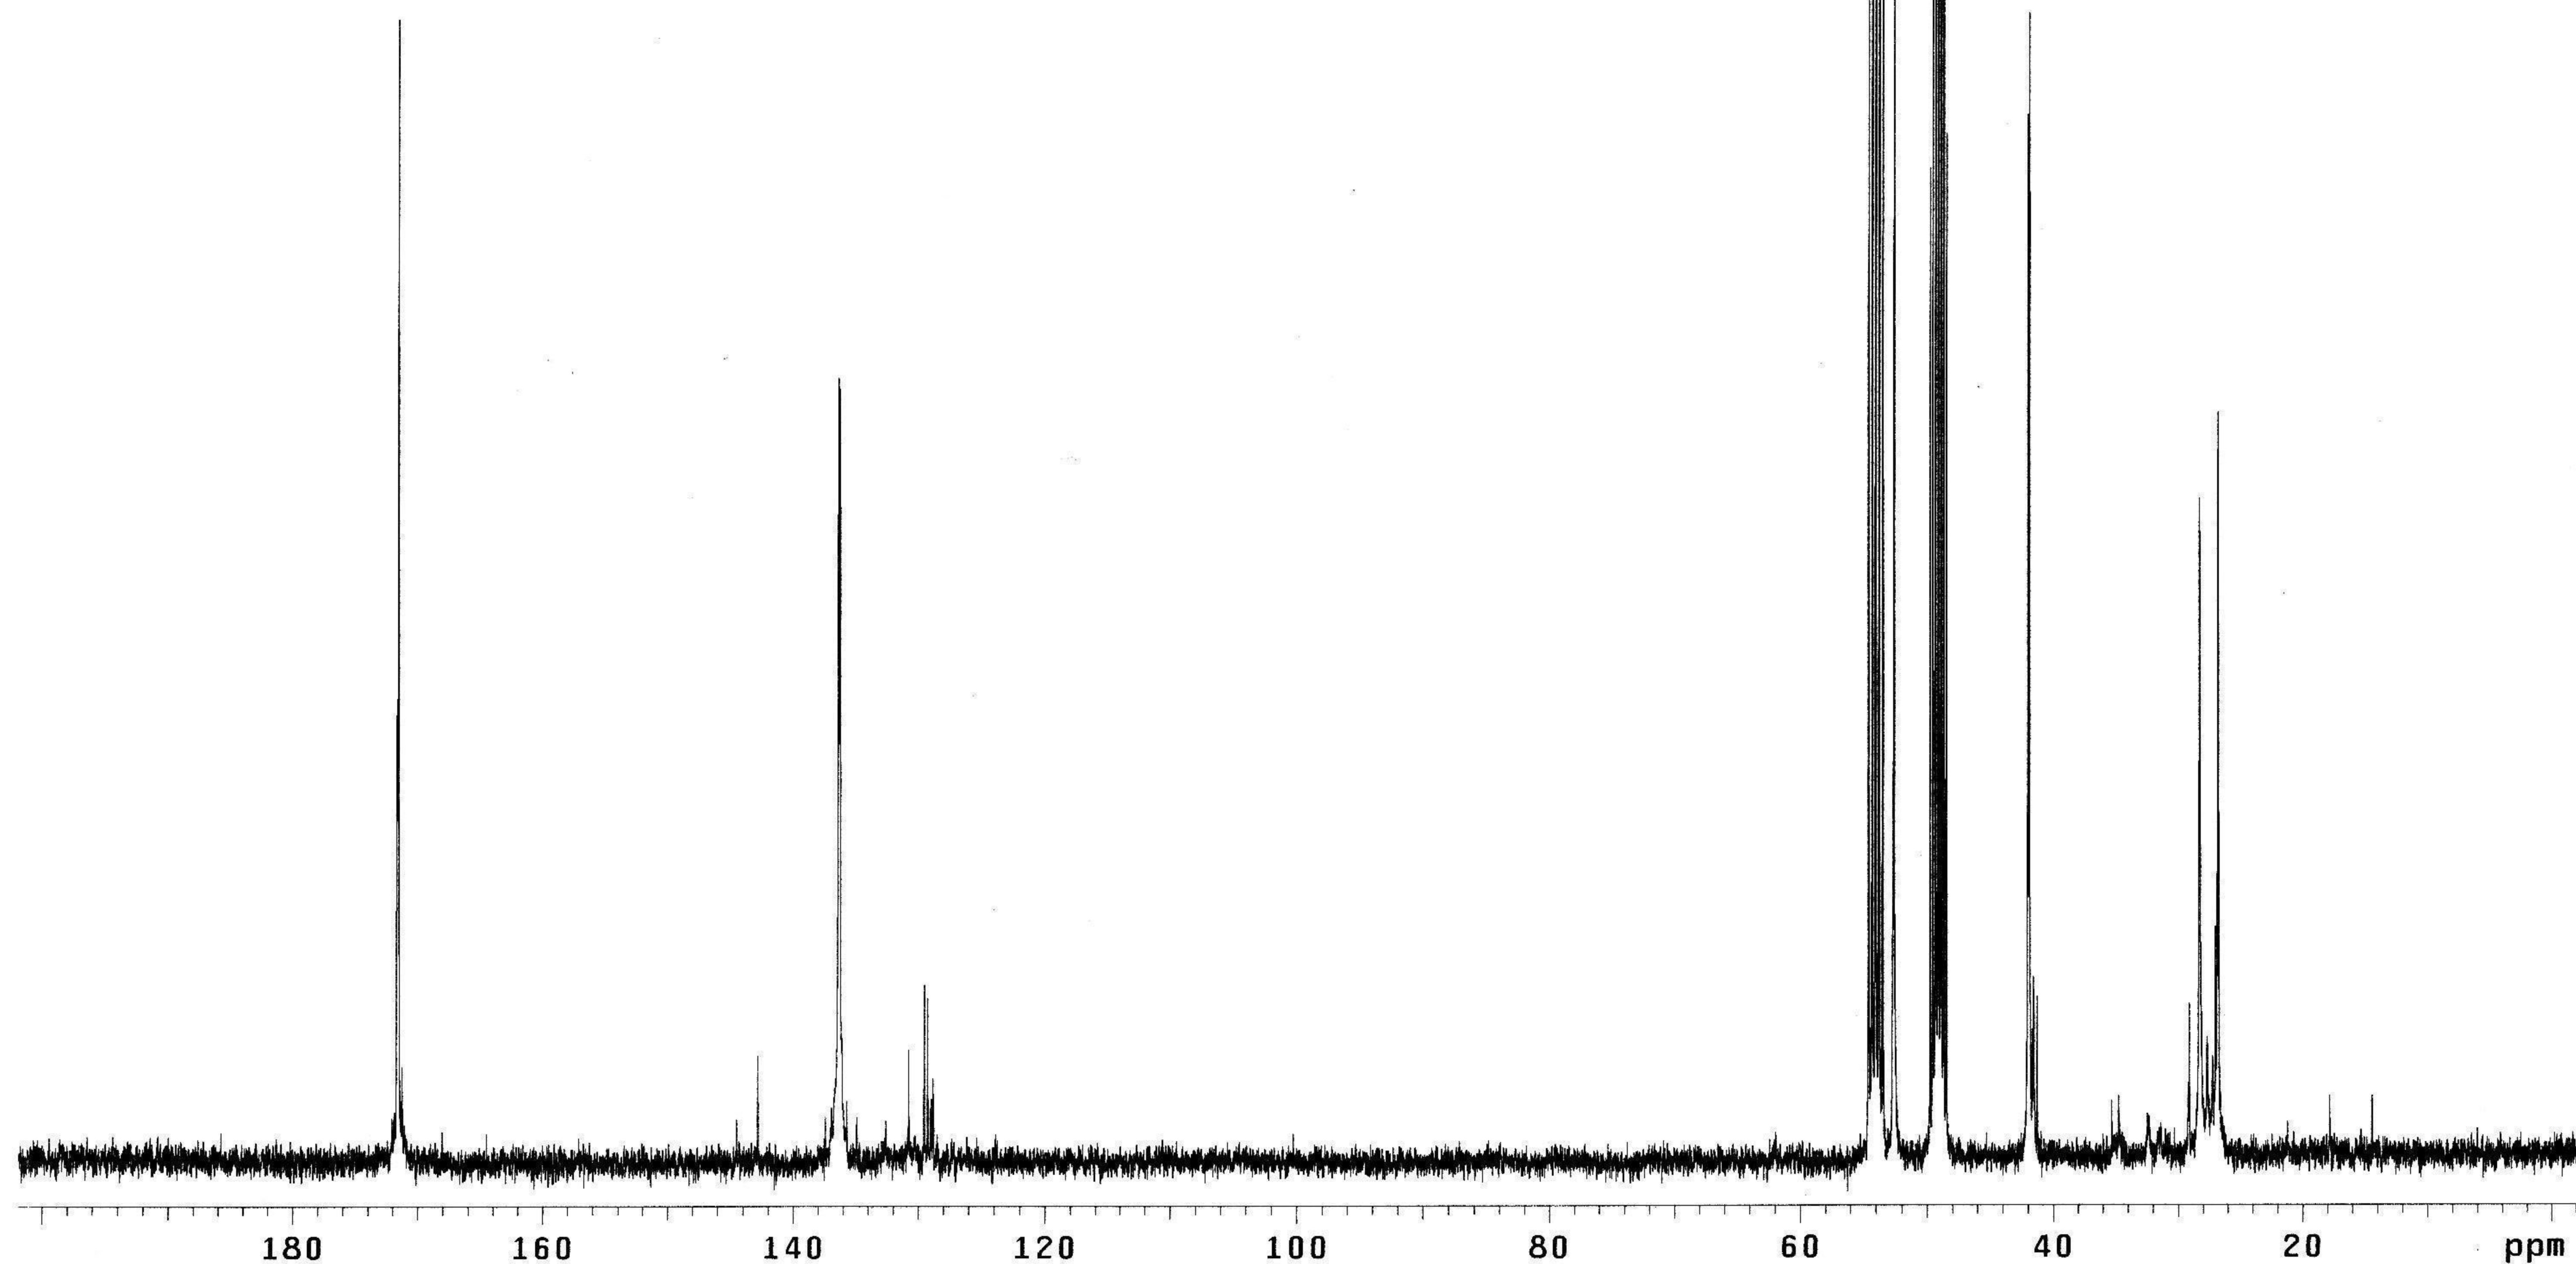



Pulse Sequence: s2pu1

Solvent: CDCl3

Temp. 25.0 C / 298.1 K  
INOVA-400 "inv400"Relax. delay 1.000 sec  
Pulse 66.0 degrees  
Acq. time 3.744 sec  
Width 6000.6 Hz  
144 repetitions  
OBSERVE H1, 399.8379287 MHz  
DATA PROCESSING  
FT size 65536  
Total time 15 min, 50 sec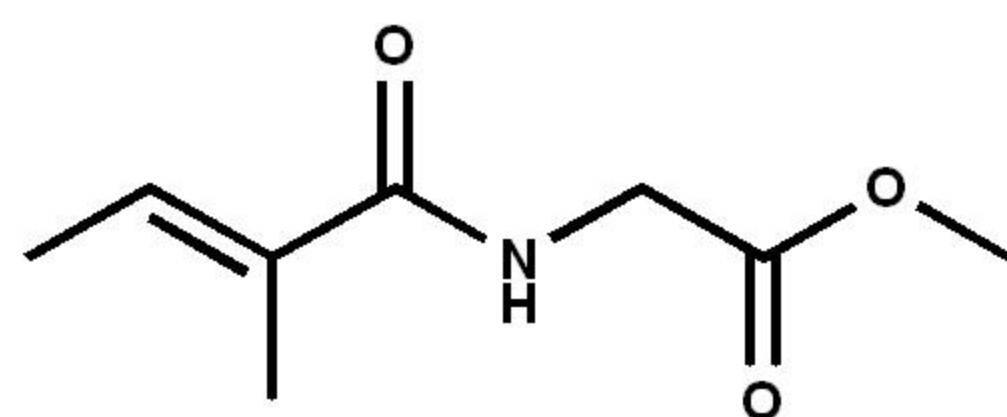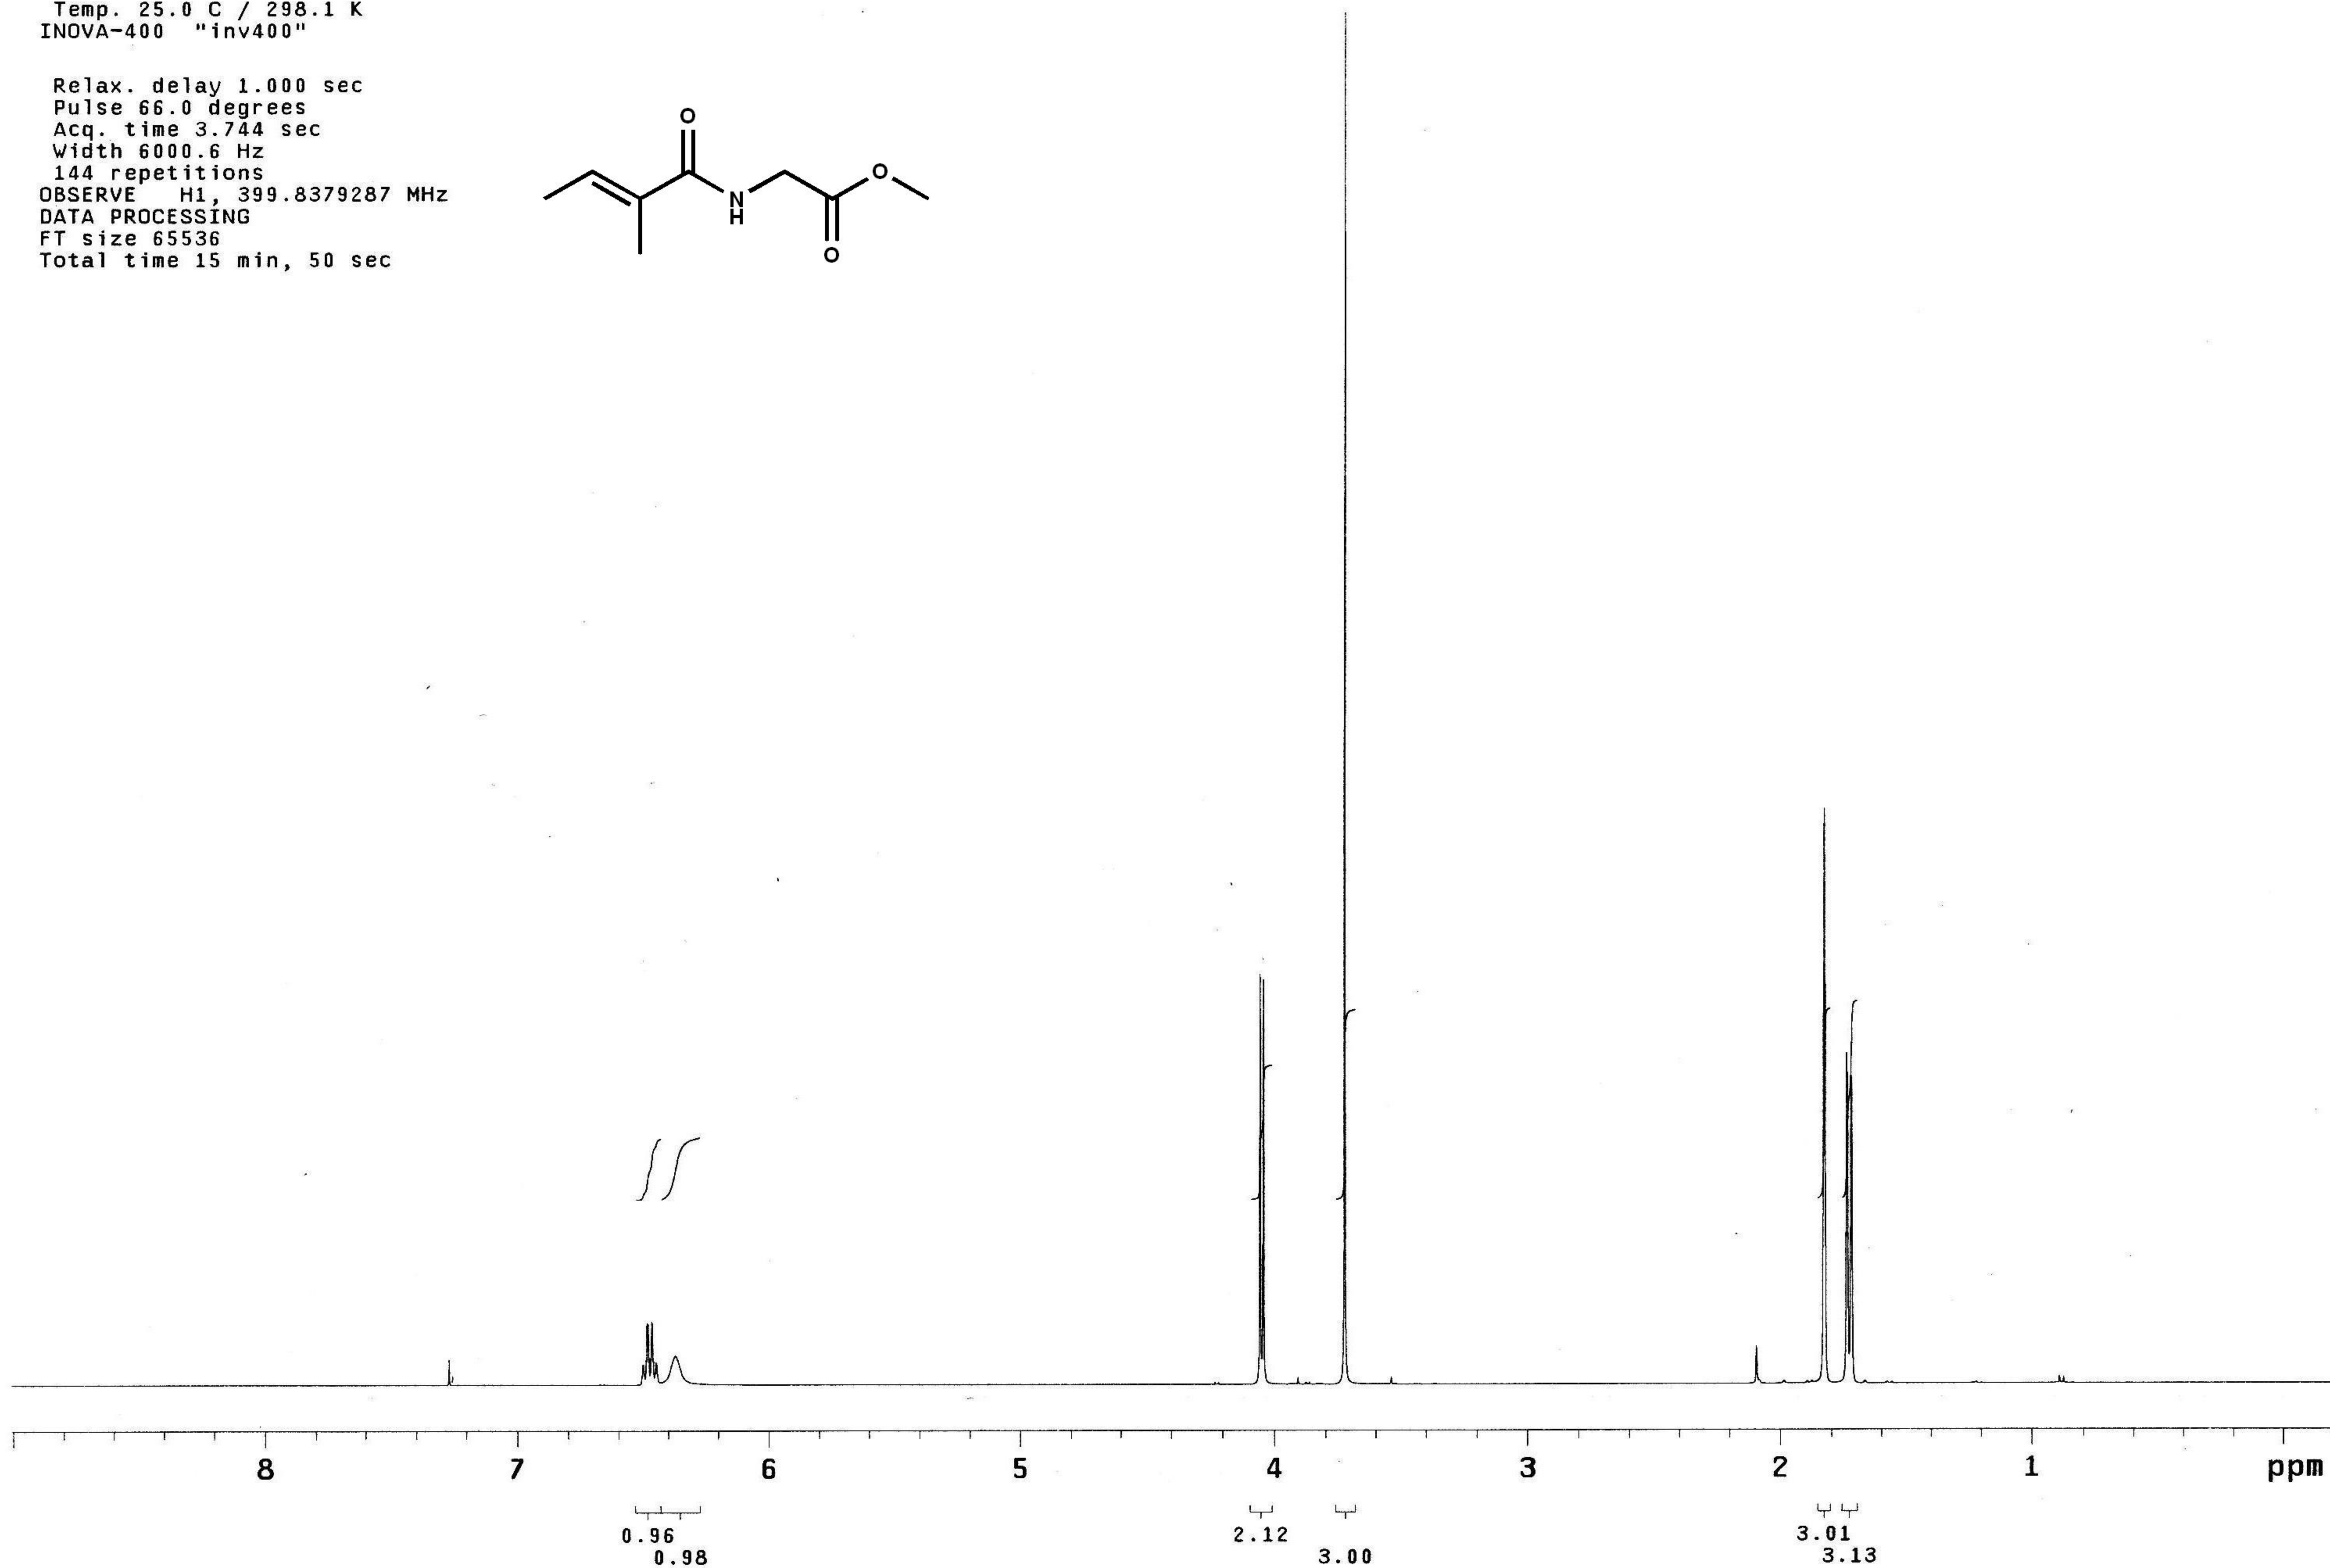

**<sup>13</sup>C-NMR**

071905-Sep-B-TiglicAcidGlyOMe-C13

Pulse Sequence: s2pu1

Solvent: CDCl<sub>3</sub>  
Temp. 25.0 C / 298.1 K  
INOVA-400 "inv400"Relax. delay 1.000 sec  
Pulse 82.1 degrees  
Acq. time 1.199 sec  
Width 25000.0 Hz  
2856 repetitions  
OBSERVE C13, 100.5393128 MHz  
DECOUPLE H1, 399.8399342 MHz  
Power 47 dB  
continuously on  
WALTZ-16 modulated  
DATA PROCESSING  
Line broadening 1.0 Hz  
FT size 65536  
Total time 1 hr, 50 min, 24 sec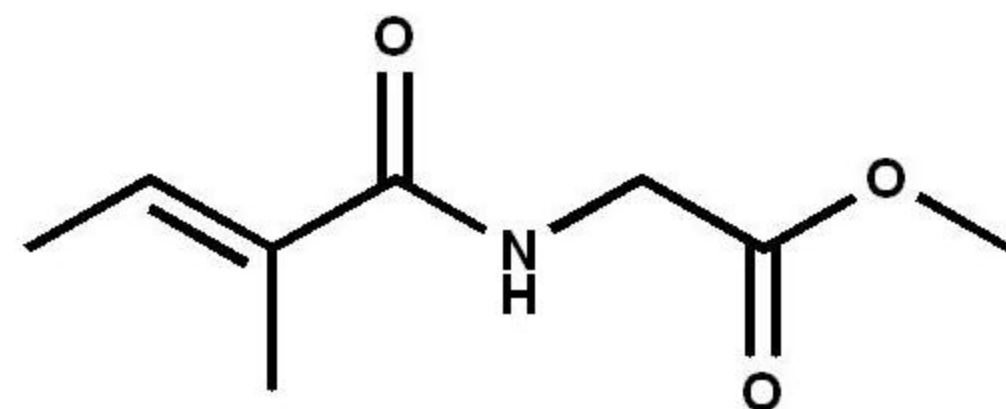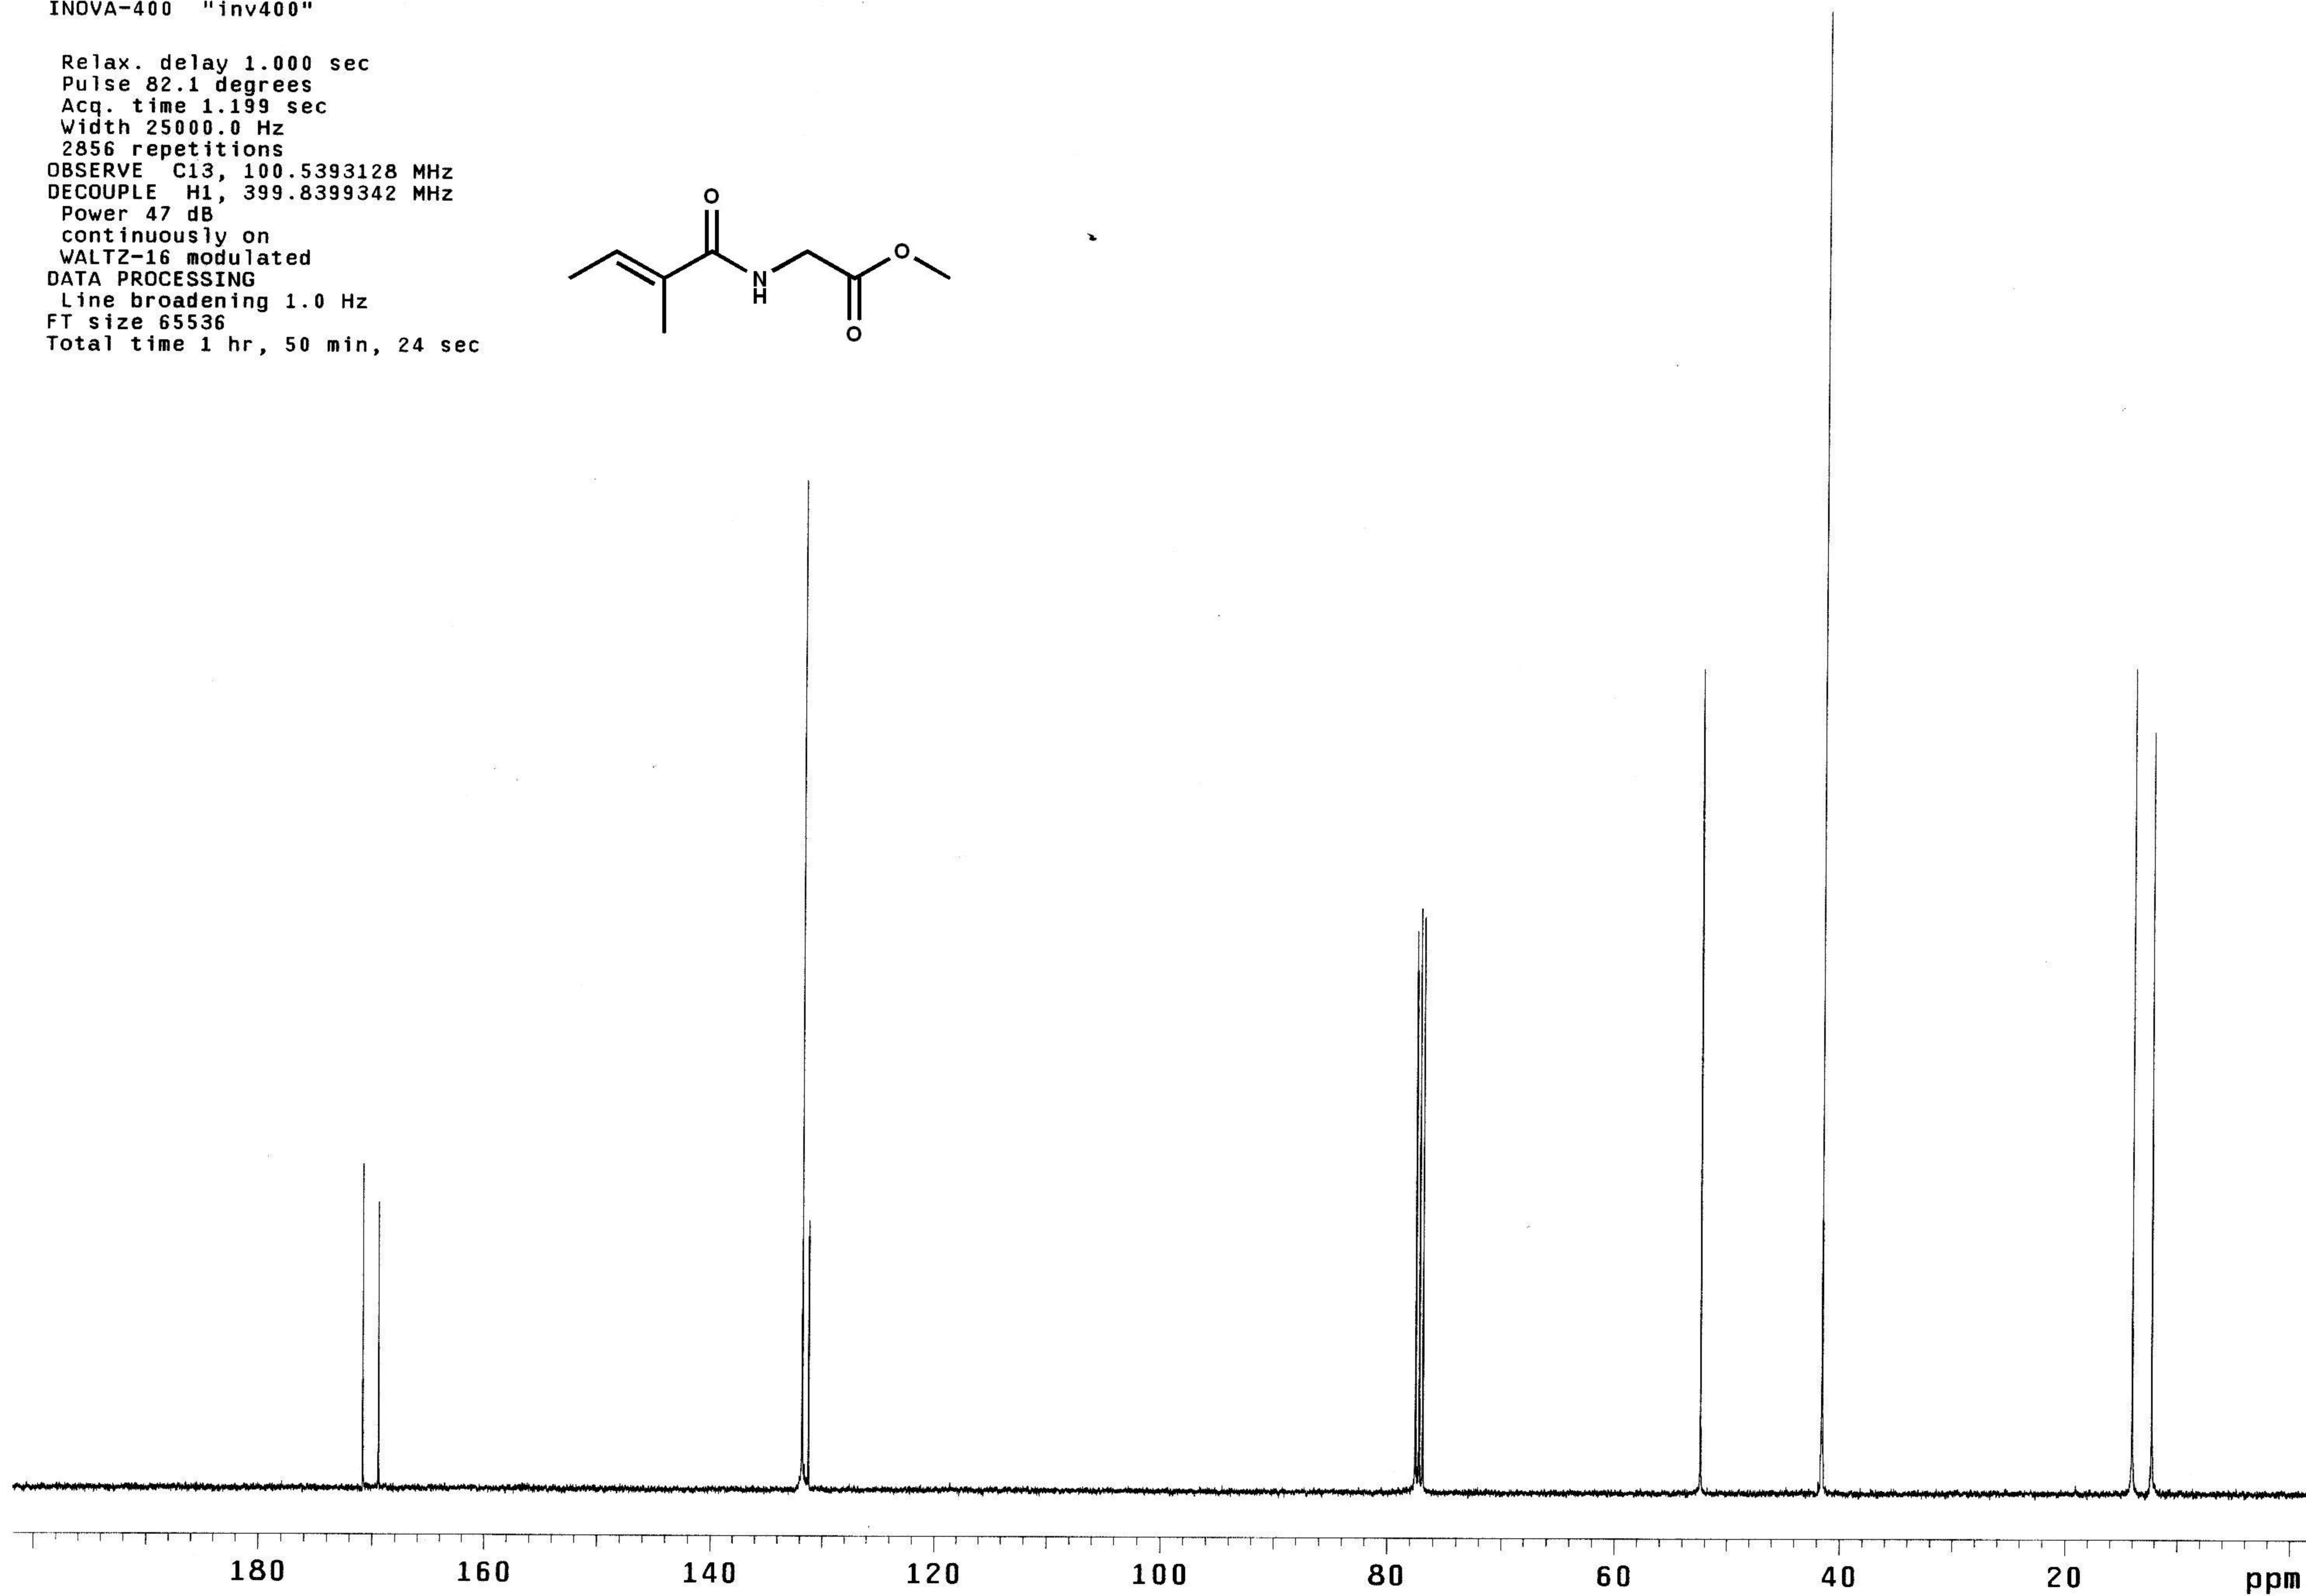



## 1H-NMR

072105-Sep-B-AngelicAcidGlyOMe

Pulse Sequence: s2pu1

Solvent: CDCl3  
Temp. 25.0 C / 298.1 K  
INNOVA-400 "inv400"Relax. delay 1.000 sec  
Pulse 66.0 degrees  
Acq. time 3.744 sec  
Width 6000.6 Hz  
128 repetitions  
OBSERVE H1, 399.8379287 MHz  
DATA PROCESSING  
FT size 65536  
Total time 15 min, 50 sec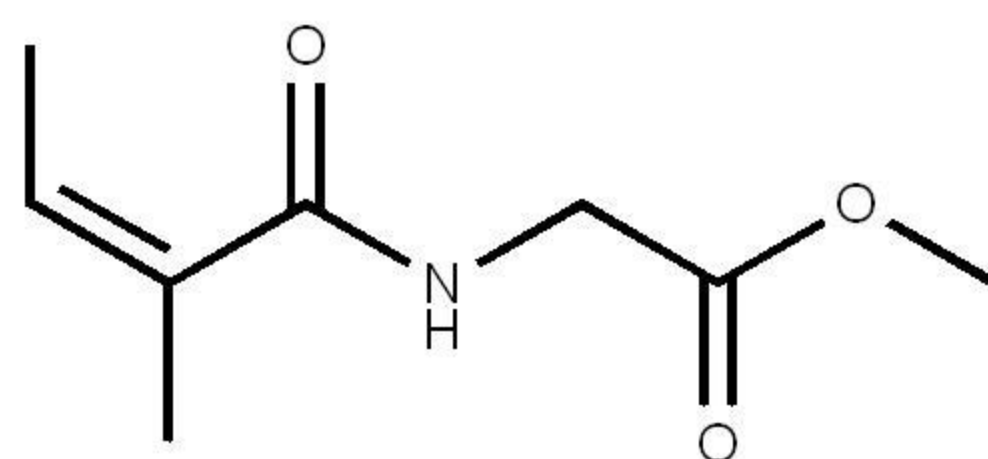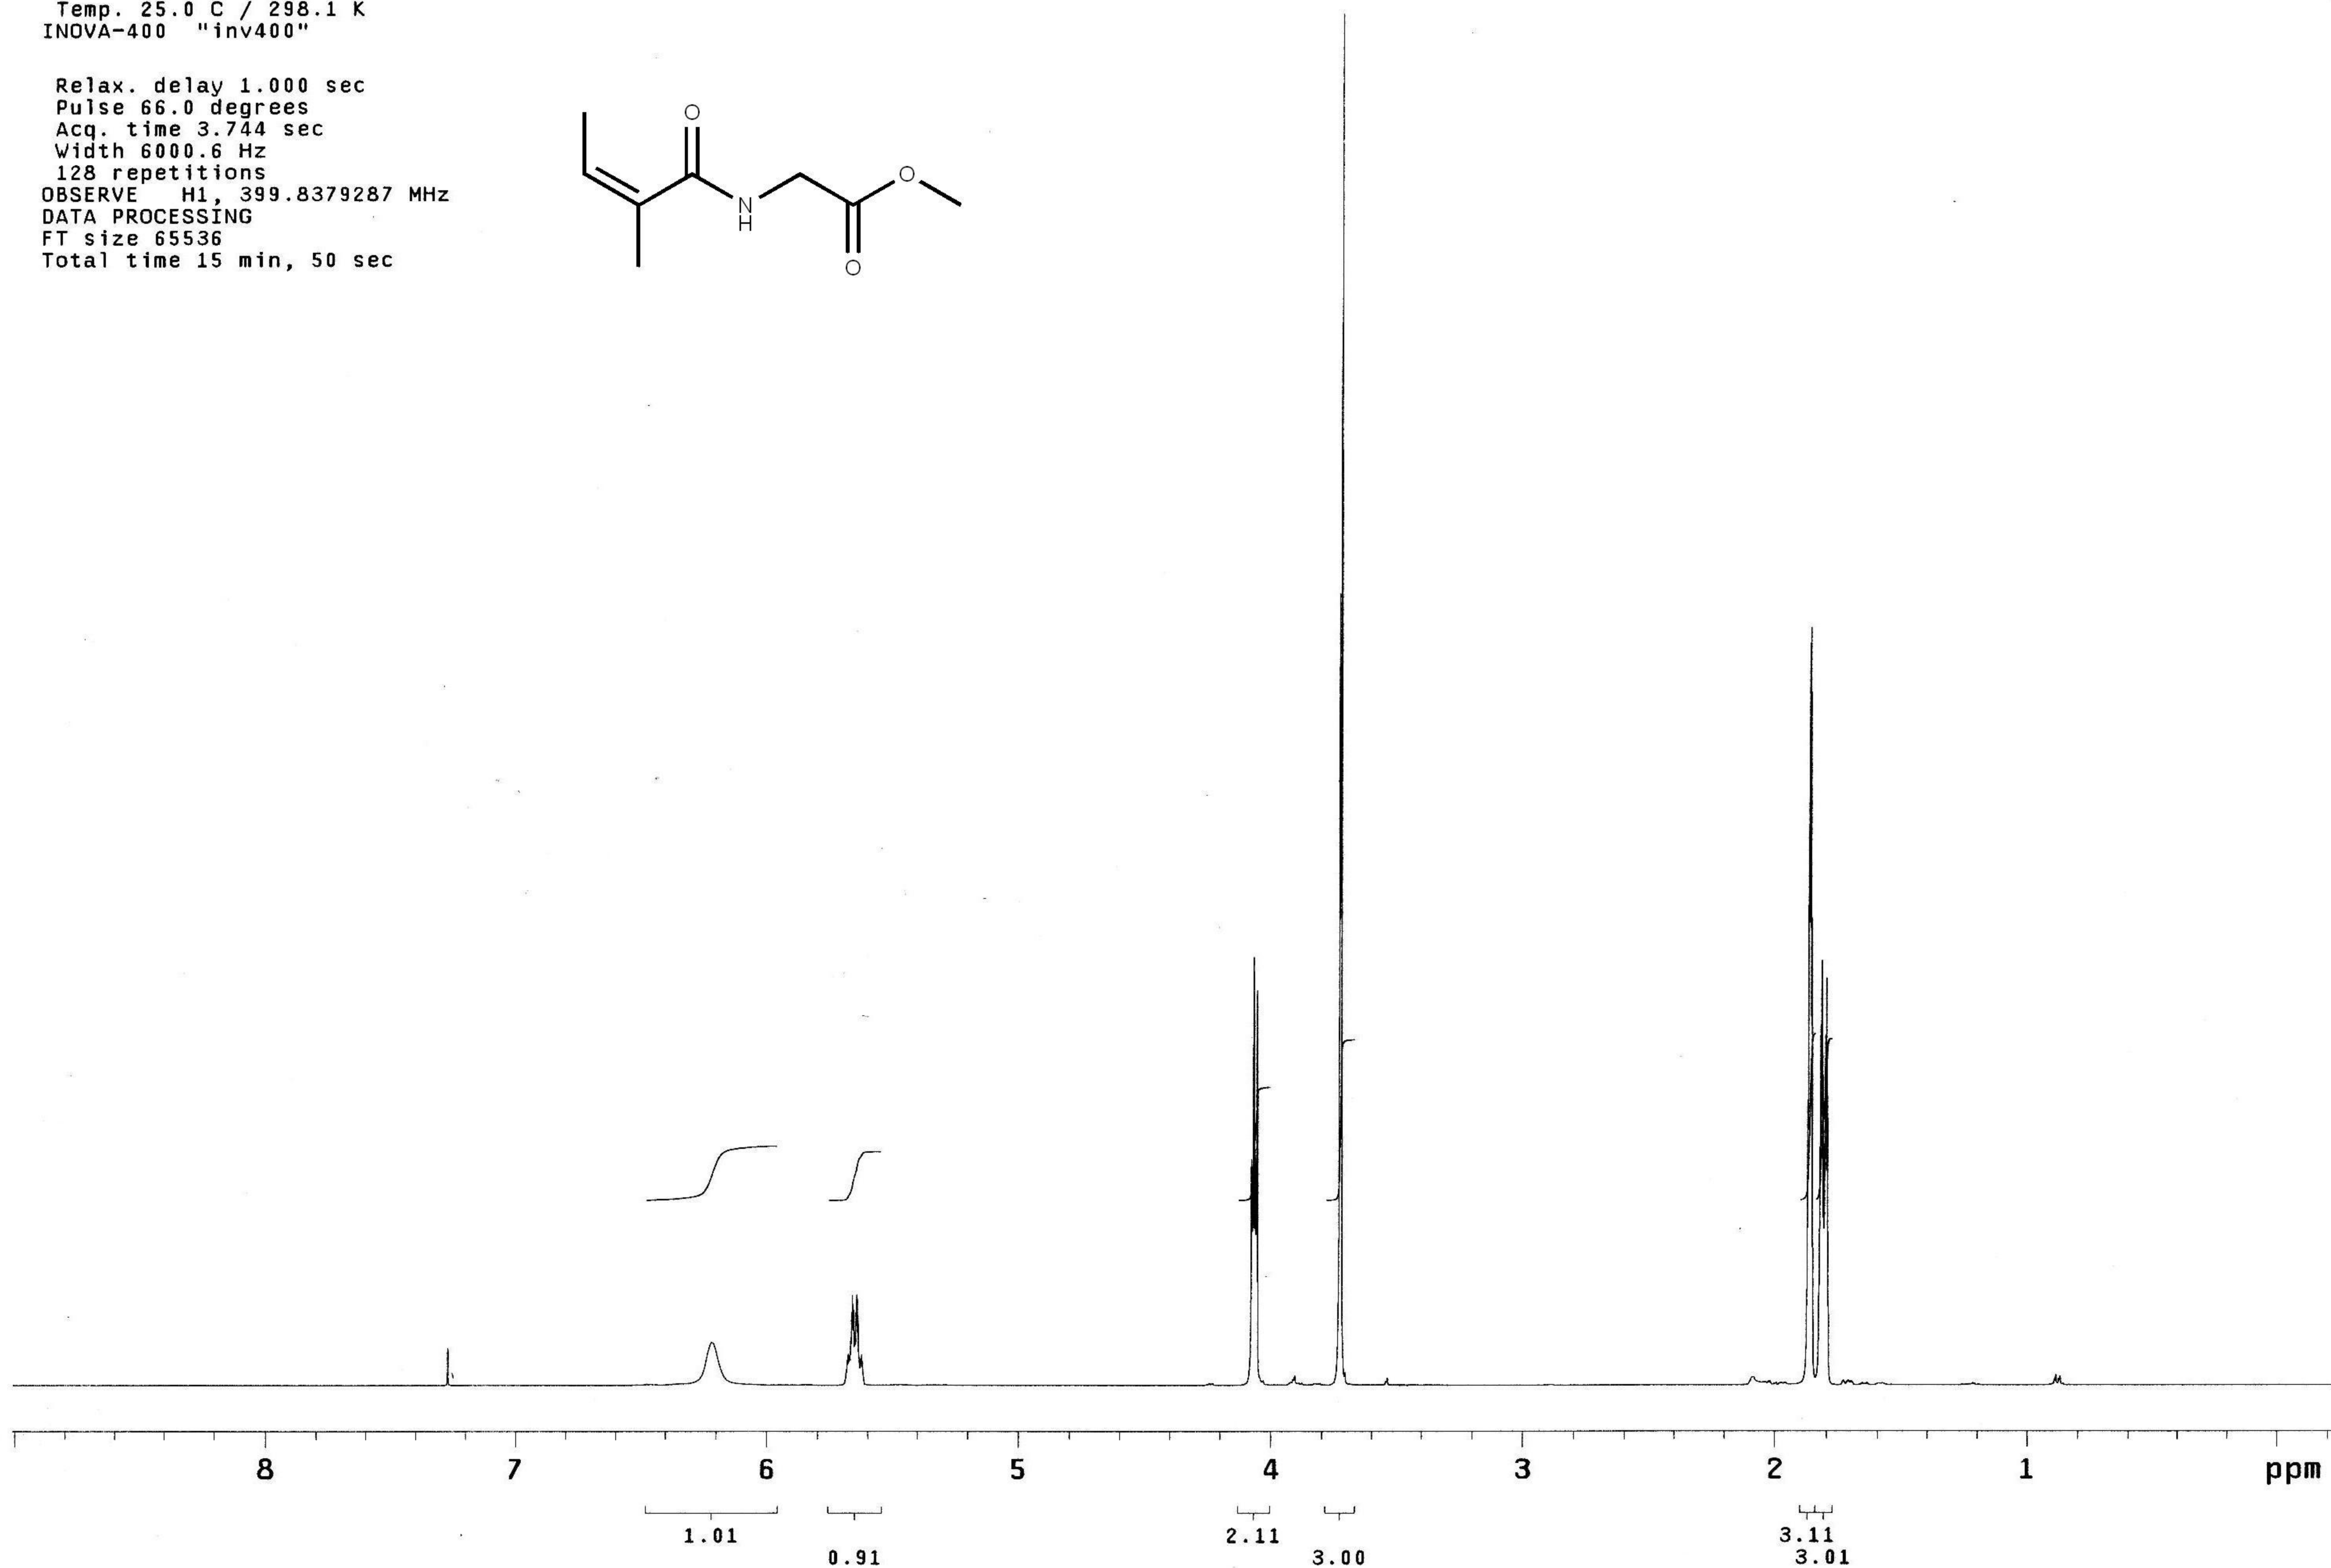

072105-Sep-B-AngelicAcidGlyOMe-C13

## 13C-NMR

Pulse Sequence: s2pu1

Solvent: CDCl3  
Temp. 25.0 C / 298.1 K  
INOVA-400 "inv400"Relax. delay 1.000 sec  
Pulse 82.1 degrees  
Acq. time 1.199 sec  
Width 25000.0 Hz  
2352 repetitions  
OBSERVE C13, 100.5393128 MHz  
DECOUPLE H1, 399.8399342 MHz  
Power 47 dB  
continuously on  
WALTZ-16 modulated  
DATA PROCESSING  
Line broadening 1.0 Hz  
FT size 65536  
Total time 1 hr, 32 min, 0 sec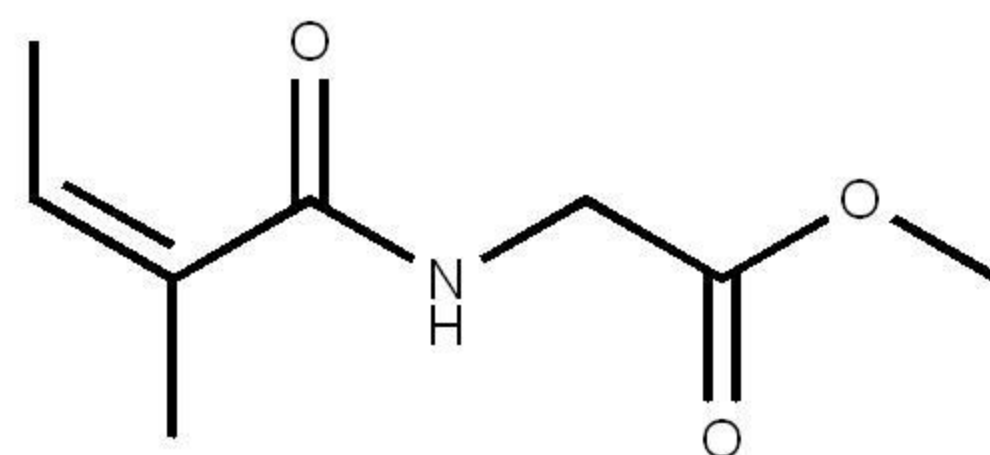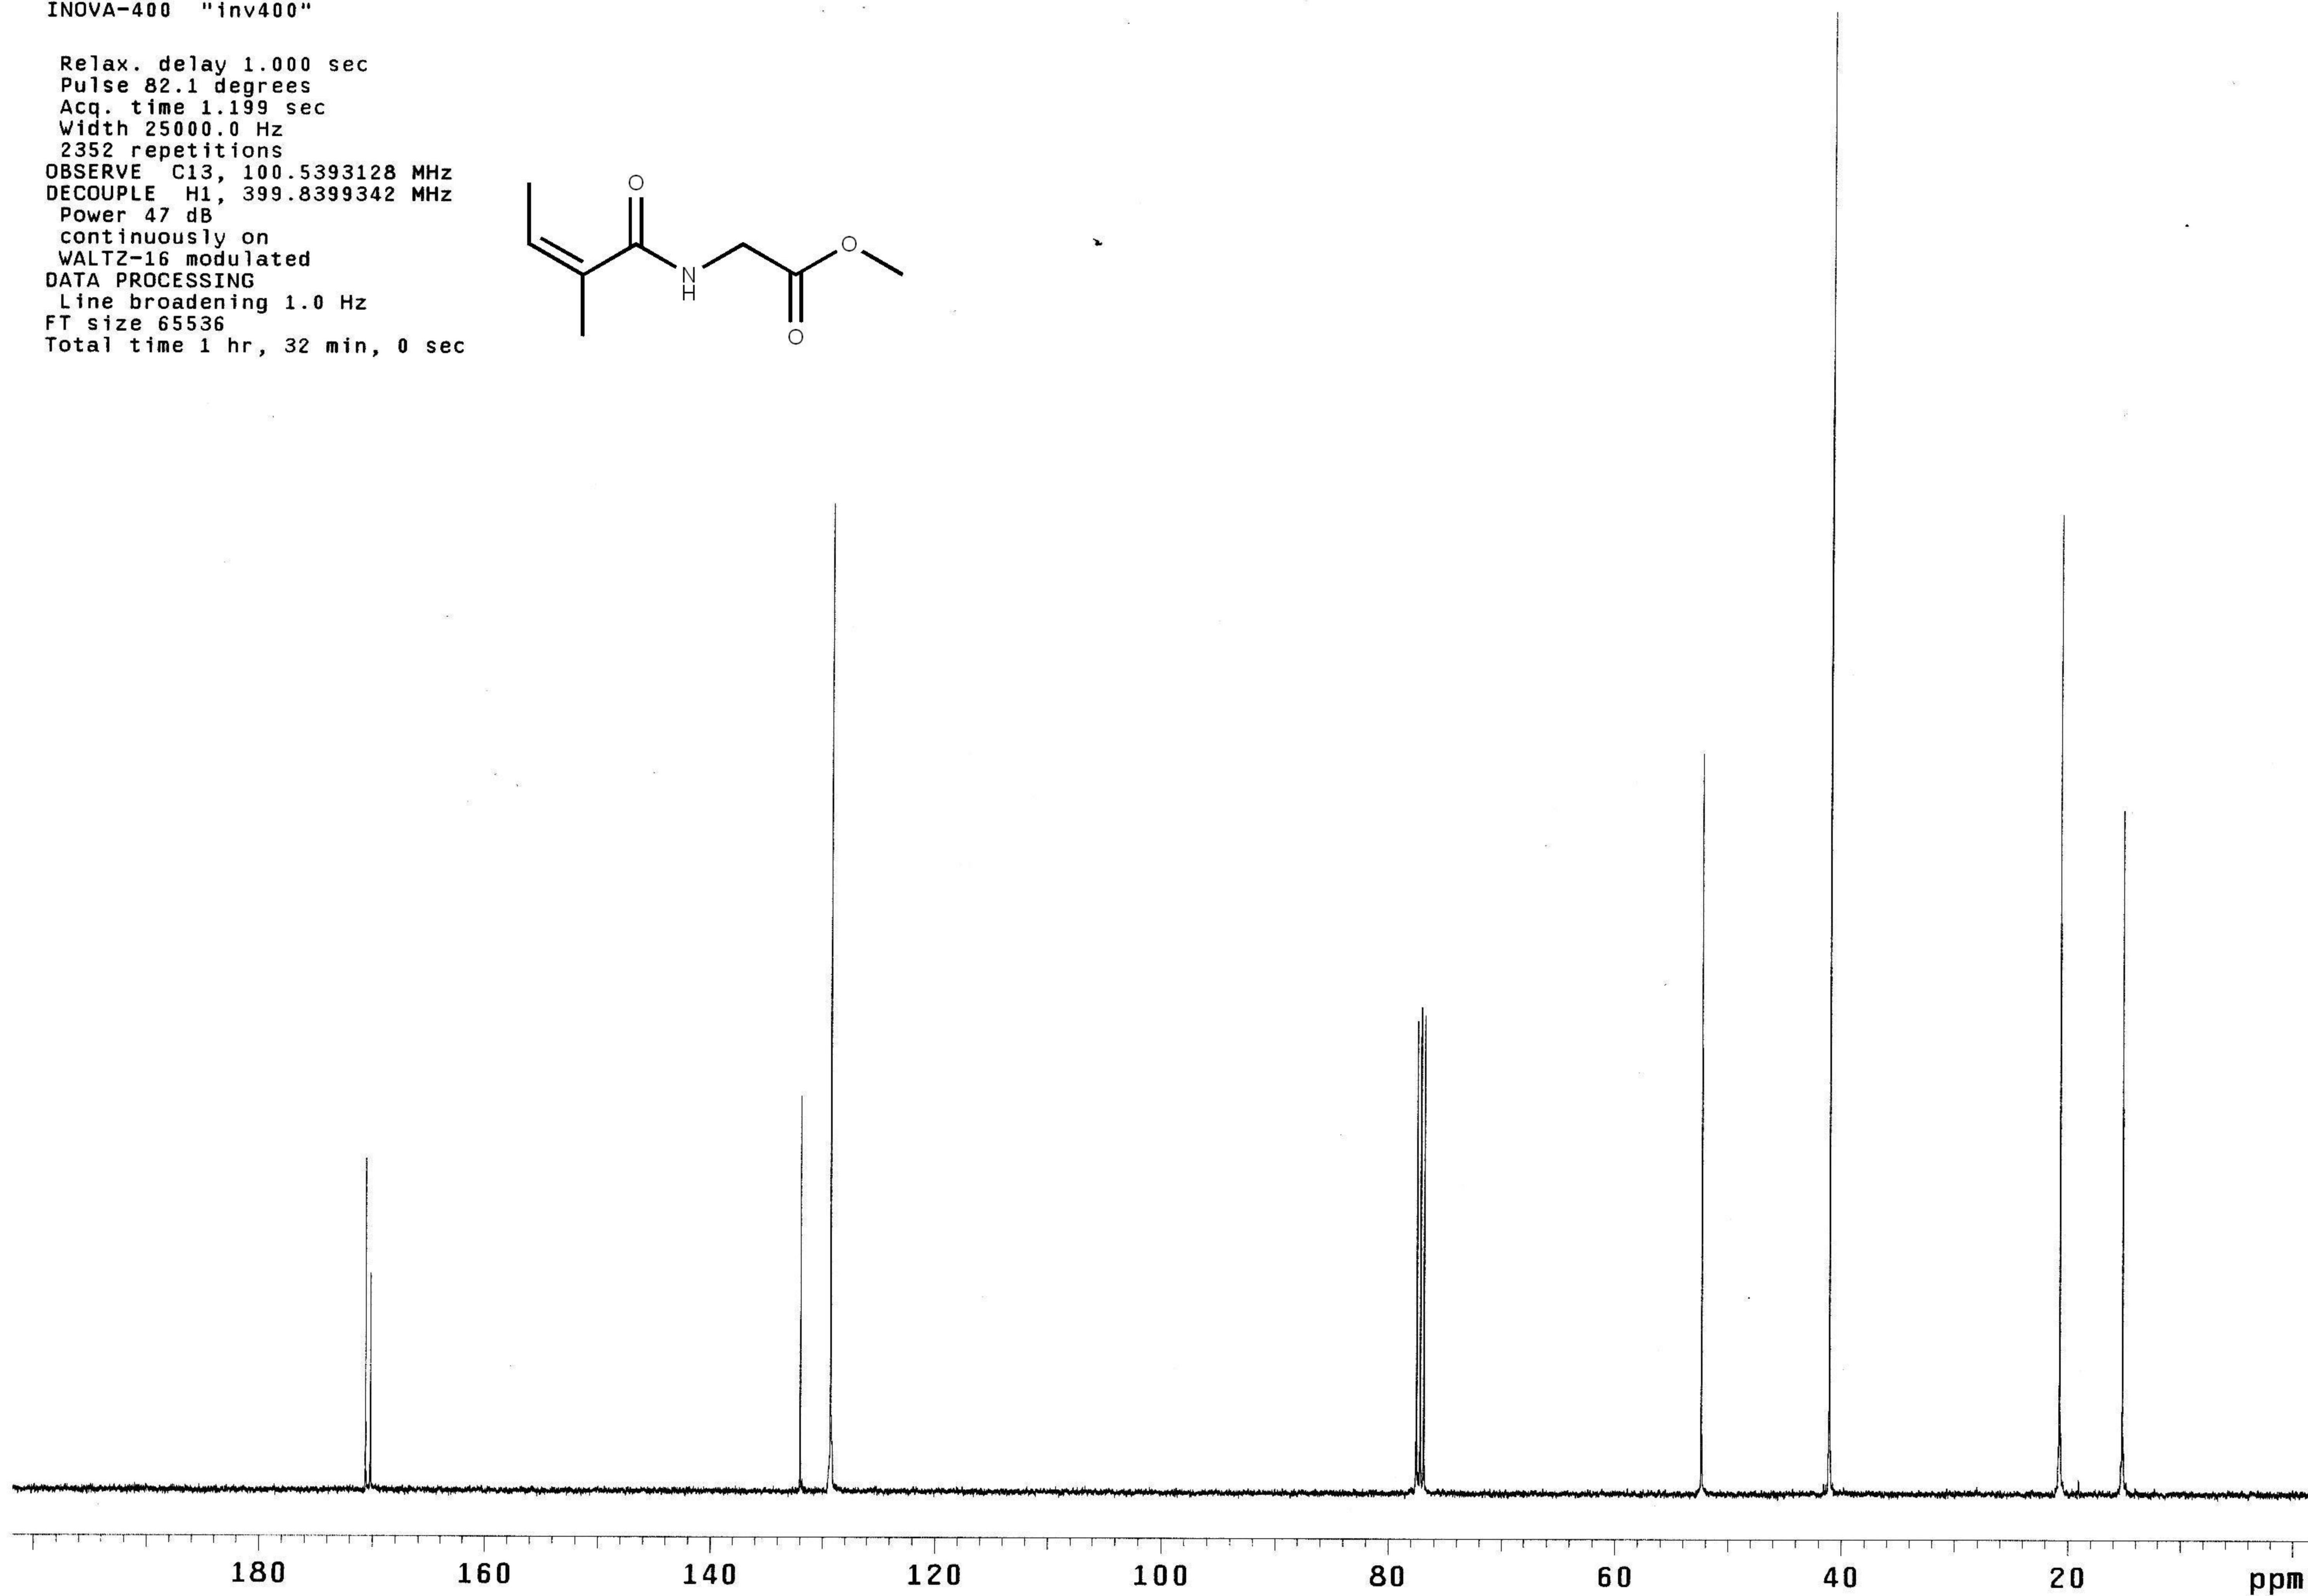

Supplement: NIHMS9136-supplement-supplemental_i.pdf [file NIHMS9136-supplement-supplemental_i.pdf]
